# Supplementary material for: Unravelling mechanisms of CaO nanoparticle-induced drought tolerance inBrassica napus: an analysis of metabolite and nutrient profiling
Source: Royal Society of Chemistry journal article supplement (doi:10.1039/d4en00080c), 2024-01-01
Supplement: d4en00080c2.xlsx [file d4en00080c2.xlsx]

## Sheet: Table S1. Total DEMs
Supplementry Table S1: Total deferentially expressed metabolites identified in rapeseed plants following the CaO NPs and drought treatment
				Control								Drought									Ca-NPs+ Drought
BGI_num	Name	Class	BWID	Area[Control-D1]	Area[Control-D2]	Area[Control-D3]	Area[Control-D4]	Area[Control-D5]	Area[Control-D6]			Area[Drought-E1]		Area[Drought-E2]	Area[Drought-E3]	Area[Drought-E4]	Area[Drought-E5]	Area[Drought-E6]			Area[DroughtNPs-F1]	Area[DroughtNPs-F2]	Area[DroughtNPs-F3]	Area[DroughtNPs-F4]	Area[DroughtNPs-F5]	Area[DroughtNPs-F6]
BGI0176	4-Acetamidophenol	Phenols	103-90-2	419558.677777273	743431.796619158	25834.0304632566	587545.141989348	516403.408284682	66363.3215343412			712813.579914995		879226.791108477	465538.0474766	498444.28536378	1048823.51136084	1355388.65293826			970833.996525832	590171.500684486	392656.505104055	318549.413889555	608921.057261332	853595.231577478
BGI0181	Octopamine	Phenols	104-14-3	637804.533749276	500385.136305376	348270.336492818	573414.857819168	668484.353416962	523383.333370849			387472.199603403		1174546.73678259	423030.369693442	529959.788214217	458603.962548362	725800.206919813			393200.912204836	574464.786679381	502806.316041987	583463.271166111	573965.677590247	659986.148111455
BGI0202	5-Aminolevulinic acid	Carboxylic acids and derivatives	106-60-5	27586963.3771395	27431986.9820217	22286997.5089858	22403037.7339961	23753868.9259776	20486902.9599874			46775375.480603		59992226.1534979	24850377.7896881	26203686.7175801	51260285.1598043	38720124.9921565			30895072.9240324	33255475.7251076	35088975.3459989	32416467.8576477	30824789.0364373	46145505.0420207
BGI0215	m-Cresol	Phenols	108-39-4	398507.942626864	511685.608471635	186519.974579205	475058.654251379	582568.956351078	127293.430360195			574249.507698887		767261.553359226	479026.33759765	541609.239432722	434683.435661288	860996.264812788			687217.584029907	704142.354416305	755214.377562626	606463.856946046	678840.192716204	664930.135614472
BGI0218	Melamine	Triazines	108-78-1	862109.457679484	714442.074652977	410812.181728885	534313.494523348	45646.8299018791	432866.380320583			146776.875873119		318675.394780768	333295.672895948	335047.514728268	356825.968492603	233753.613078469			198676.427911346	189531.521427322	306633.354517596	318268.058117965	297540.928858188	175324.059825042
BGI0225	Succinic acid	Carboxylic acids and derivatives	110-15-6	5223515.55331541	2506441.29472453	3325725.62944898	2813915.23889543	2935736.60007638	4586265.94728451			3322687.84233629		2143707.33581403	3529323.09250679	2831561.37236	2513482.91824194	2692481.99119915			3452740.38095845	3536371.69706691	2724402.45031306	2018735.61467428	2336015.93330434	2815151.05576173
BGI0226	Maleic acid 马来酸	Carboxylic acids and derivatives	110-16-7	3780357.65650214	2771639.9118648	2279925.85281434	2708142.21304612	2180444.1665073	3058757.61395518			2463751.13211678		1972665.02112935	2905643.90516817	2156837.5546963	2292417.35565027	2268679.71656625			2774981.72884409	2575420.60959624	2494329.3676921	1925129.64307548	2083769.29923122	1947217.27360165
BGI0227	Fumaric acid 富马酸	Carboxylic acids and derivatives	110-17-8	3995616.34959965	2742098.24984343	2532236.66860054	2669272.92297637	2501492.89991429	3168431.23957536			2718717.90153976		2001109.47325199	2858864.57544153	2369699.82766541	2651228.45219184	2116903.23588146			2421736.23100576	2668030.47624733	2813827.64133155	2024298.1077557	1882369.39198655	1798287.46242877
BGI0232	Agnuside 慧花牡荆苷	Prenol lipids	11027-63-7	197965.504541646	102393.459617059	89741.5688586705	51895.143707631	205453.152290721	82349.313163905			139672.640772051		155011.551793213	106038.748497471	104026.500153224	104528.434205102	114361.745757924			169756.596020008	198776.851766601	147940.286449394	133353.688023344	130836.741790792	152734.839479007
BGI0268	All trans-Retinal	Prenol lipids	116-31-4	2164294.83756051	1738586.86561143	1432215.29008838	1778122.44592143	2189097.38388945	1261922.46026415			1412294.34882984		1746239.79569365	1692934.04083214	1962842.2880903	1421476.21924222	2329813.98801189			2328414.64381592	2194522.89729519	2111538.77984093	2447326.94933548	1943284.20628491	2703491.93680637
BGI0273	Quercetin 槲皮素	Flavonoids	117-39-5	17231.557858253	19453.7421007148	21308.2640168294	23028.8047412604	26053.6590125602	25788.8702922662			26988.4963407545		8065.133016525	22787.7448156493	27972.3559892219	22661.3277010542	36126.4288094496			26623.3427213305	23596.9623501306	20862.8558631209	9819.61468547314	29333.1466884964	20625.4408787694
BGI0276	Guanosine 鸟苷	Purine nucleosides	118-00-3	199348.343319138	366042.068933935	423480.346166171	145831.244908028	56496.5979602646	331703.980066361			233838.992147587		231468.510792038	233475.364611786	116023.247217914	209839.211099743	183009.568939438			151062.163876343	366574.8735331	147740.113621863	229574.379336916	170986.242017385	88000.8394353492
BGI0284	N-Acetyl-L-leucine	Carboxylic acids and derivatives	1188-21-2	13834.1656528256	62123.2840358439	4953.12621057661	18194.5409242578	2856.12730587396	8552.56967678173			299072.603862883		125698.464137287	11651.9238739241	6018.88312956079	8691.98694254621	36348.6979471589			3505.93460852667	3604.5540962678	19575.6458421367	6919.56243909011	2303.43099352841	14872.2578163767
BGI0286	L-Homocitrulline	Carboxylic acids and derivatives	1190-49-4	182656.054064922	217424.344642873	125009.36703489	284068.339787427	283171.609202606	221050.921979444			413391.1122157		382530.415361642	425268.816131932	223695.897987258	329441.84553511	422172.015995934			310299.013186533	273291.964829087	215648.969770761	179852.948776028	439205.192337348	426719.903410323
BGI0295	Dihydrocoumarin	3,4-dihydrocoumarins	119-84-6	4119725.16689995	4575414.32974594	8470387.31941448	5551220.13056583	5087374.92281638	10516689.6147258			4510143.69611296		4398714.76225068	7864278.06121862	4756871.09754561	4129564.48658026	4310361.0920778			3968931.69411843	5338029.69047834	4216952.0916322	5744189.25847017	5615356.19405817	4655047.94594792
BGI0300	Vanillin 香兰素	Phenols	121-33-5	509318.010959779	481959.489799694	151241.558769094	198257.181737861	230304.593414028	259362.841453382			494301.622635099		471744.394251339	177805.861818178	269608.226545447	245073.371248184	333466.967780053			383481.633801315	295645.419001224	340561.302330107	358240.461483778	252355.523538269	347715.608100557
BGI0312	1-Caffeoylquinic acid 1-咖啡酰奎宁酸	Organooxygen compounds	1241-87-8	1361029.21437787	745292.091986525	1817892.87798664	1618201.3808929	4785684.72527518	3731254.19413949			1874558.44015929		1202815.48966423	1732412.31442722	1787327.53588211	1505956.4567705	1969885.02450625			3178179.75189857	3480133.09493887	2454371.10124571	1236261.35332391	1393120.64896112	1609971.04422712
BGI0313	Spermidine	Organonitrogen compounds	124-20-9	18975275.1855664	25697265.1266931	770282.794773432	14647783.6619446	3127970.70556956	466167.084189606			9366785.53853077		5534813.84369497	12382752.0311841	6295161.98865843	11374273.8673068	3804167.92250256			10334488.811901	3454956.10338428	11628270.2437284	18573075.9159633	9089295.88922041	12379506.2251227
BGI0340	Decursinol angelate 紫花前胡醇当归酸酯	Coumarins and derivatives	130848-06-5	36252.3319063257	69229.8697205592	61065.9941250912	95076.2353059334	74636.1017005945	86892.9103567544			34057.7450581816		121164.348009957	93583.8644801956	61723.8607049946	76411.9959137286	146744.64935957			47173.2293128443	63021.2104100342	48151.8878351861	54943.9106603901	59248.8985494973	69917.2923310017
BGI0348	Camelliaside B 山茶苷B	Flavonoids	131573-90-5	5508.24359836856	11786.636981712	14921.7572308448	14135.0446466124	65229.3008226986	15464.1979136608			150798.310769925		91431.7335949187	135095.343580272	33559.1702707724	29237.2639404677	110936.236393304			40581.0230913253	35981.6559549808	78821.4169753312	52510.1335266412	41184.4154850987	122093.958846538
BGI0381	D-Erythronic acid	Organooxygen compounds	13752-84-6	833553.259136473	717294.718202476	550177.916989875	558303.915503934	555606.564299533	500856.386635922			241306.086027561		492701.907288278	500607.841839207	436967.451363028	537325.732116918	487348.166222689			350522.545577958	734147.612890654	489758.279176557	508116.593210461	750401.976940199	115196.060114784
BGI0386	Agomelatine	Carboxylic acids and derivatives	138112-76-2	588003.078166544	582804.371489882	842185.411489455	250094.009609196	416759.951634076	758350.18010693			271205.449487257		434641.375961468	552458.182934543	562848.978309278	666181.298525289	359389.533406048			393186.340573047	477394.666744417	504351.147594368	522140.637429686	566598.421127714	399990.134648172
BGI0388	Marmesin 异紫花前胡内酯	Coumarins and derivatives	13849-08-6	233270.264472308	925446.183938834	642131.935310773	633649.166117084	1057308.21586605	394200.895705814			1022463.06735807		1501646.73088417	638941.431259182	1320145.34590095	731920.437094797	986995.509692391			180769.835326427	476636.144751618	1716829.38120968	1288657.1549999	1031637.40640177	378596.615870564
BGI0390	Shikimic acid 莽草酸	Organooxygen compounds	138-59-0	4711395.27157394	3130153.57564179	3069633.60879303	3180088.70582988	2984039.3150165	3362665.38615553			2523925.71275757		2432463.65984238	3625641.10228826	2724239.66358746	3017485.1094318	3204837.14517674			3904221.99166812	3318847.74480212	2554180.14548787	1237129.28119881	1944774.22366698	2134702.29270723
BGI0418	Pregnenolone	Steroids and steroid derivatives	145-13-1	66160.5538780268	31067.3616039861	8407.83883815723	16636.675011787	26249.3155794062	10890.6617371121			171485.259611434		136604.36702481	22743.3359586927	41019.1944313548	25628.9078621881	111322.642740399			66816.7604070581	29236.838804301	75945.3912380694	44493.9795113562	24621.1179530481	265920.245993512
BGI0423	Flavin mononucleotide	Flavin nucleotides	146-17-8	13187.0433279824	15106.8566919553	137068.344727628	25745.8466649967	121506.549428726	111355.911370906			51585.9232623792		99372.2635782885	44388.4528872411	80543.4671101002	50172.1156654247	89317.1432258805			68099.0640045242	160270.388324319	182862.814947575	92253.8731911622	184421.526794183	72883.5203621696
BGI0436	Bicine	Carboxylic acids and derivatives	150-25-4	150009.117968437	253562.119292735	224296.188762389	316737.109304098	280225.296447951	194927.020202923			133921.878912413		343823.693285335	384229.031107098	239383.461013116	195988.020053533	257636.431925333			175055.812780749	234457.978248752	223314.781192801	325816.942830611	376147.023866027	203907.412724219
BGI0445	Ginkgolide B 银杏内酯B	Prenol lipids	15291-77-7	3241.38950211688	9691.83858571445	167993.530642057	169381.321818626	513256.088978932	14590.2647228178			892969.465003658		203757.33407315	294197.875183435	229533.385123667	493183.509425964	784421.127346741			304647.162936489	222055.288867086	492380.273926414	309946.687770956	440377.848115871	553501.275558125
BGI0449	Rutin 芦丁	Flavonoids	153-18-4	1747070.422455	849940.498409378	946962.877143309	1430606.47624428	1032631.79565605	849083.834372545			391253.727869527		1109700.27048467	515596.431181766	901966.50866279	157177.436181488	845725.52017086			533293.551670128	1747930.70193808	916355.298997093	1168542.10109135	560951.059807015	802797.651396366
BGI0478	Doxepin	Benzoxepines	1668-19-5	593838.734845934	532749.41404941	115010.210317183	338691.236490767	157178.715838777	179956.102687356			346851.008974148		224589.347652235	389002.38311025	175183.864039776	314280.3635354	145187.055633007			230253.153998949	223557.036442391	268990.988945787	248983.950816564	139031.372052618	296437.773644368
BGI0515	3-Methoxyphenylacetic acid	Phenol ethers	1798-09-0	4429850.8372439	4151883.27138464	1023129.80107117	2891134.9271038	1300251.00064479	1356963.0511848			1910920.28848298		1895524.09008522	1641261.33516463	1853118.67759939	1645340.12051524	2125705.09373475			1923257.22200683	1993573.95526688	1899121.29966259	1826665.06491923	1288616.54415251	1937468.27628823
BGI0539	1-Deoxynojirimycin 1-脱氧野尻霉素	Piperidines	19130-96-2	9938017.39724046	4251734.37499618	7958671.78119805	2238445.04537662	5007359.02981098	10626048.1681842			2469857.7554786		4620111.94154993	2443803.79521274	2869391.0965399	2943525.51835712	2829868.25497986			6467231.16431411	6938143.08164885	2256211.67125798	2824818.90608802	7418379.60108138	3091177.20036212
BGI0551	N-α-Acetyl-L-lysine	Carboxylic acids and derivatives	1946-82-3	2437636.6112313	3345089.90034675	2657815.40625288	4586062.09677522	4317811.0241195	1885329.08684276			6519193.79343254		6939936.25226944	6793478.49964664	4607535.70676117	4490179.76116096	7742524.85272801			4538956.44376113	4238919.62565731	3434527.67406533	3288883.93433962	5675871.74698431	8349652.30764589
BGI0572	Diosmetin-7-O-β-D-glucopyranoside 香叶木素-7-O-β-D-葡萄糖苷	Flavonoids	20126-59-4	47245.7075914612	581809.163514719	81477.0680780541	779225.725535984	1988276.5536755	61427.6662216193			22342.3045932147		379933.473008761	549660.424946273	2090050.10232317	206256.400905204	75519.3590619269			72588.0980377749	379729.78638568	1002128.00914014	812169.722628123	1214930.01933933	74541.3844350374
BGI0608	5-Methylcytidine	Pyrimidine nucleosides	2140-61-6	240956.768039123	145870.89308375	76845.1252927078	58690.723814742	58222.350022524	81476.8056389525			35379.2307488545		77950.4025472896	86903.3321066622	32513.6365815999	64987.6638228213	59822.8835331566			74583.4401508017	64413.1837467607	53270.2082951945	79517.3050292105	69953.5705848766	86032.9482020293
BGI0611	Glucoraphanin 萝卜硫苷	Organooxygen compounds	21414-41-5	9733.79830285129	26541.7391307217	26834.7424575692	44042.737832549	115326.553336861	16895.566467668			123148.071972873		146815.54077064	38442.4670125583	48856.5951807056	115227.901844886	172327.827109909			74351.2654842908	51286.1643482457	50544.0877695815	64334.0352634369	46212.8751449104	114145.915064659
BGI0614	S-Allyl-L-cysteine	Carboxylic acids and derivatives	21593-77-1	142621.138093143	161965.808268289	113657.789200201	149700.322128382	113739.13658163	116206.026730202			156850.955139837		83502.8571326353	179659.031416585	137642.185758546	99261.7245073655	107944.151847218			167141.473834873	105942.93769415	155272.177280217	186488.172873512	176254.816908037	113781.612592297
BGI0616	N-Propionylglycine	Carboxylic acids and derivatives	21709-90-0	475706.16925393	789335.764473568	768110.1614383	1132037.72524407	1314776.97216618	756375.632848664			1130773.91383422		919374.964100708	1060337.07492087	1450749.54943273	1618598.90229854	1365809.65597163			2013381.79318208	2097747.00831117	1627866.47273011	1651153.74389773	1636762.22324993	1228648.32746293
BGI0642	1H-imidazole-1-acetic acid	Carboxylic acids and derivatives	22884-10-2	29948360.8894752	20061523.9045469	27213271.7234498	19938778.2989341	30657610.8871409	36781281.8039794			20644335.4262346		19667920.0507166	25670393.3345896	22059355.2504779	17456790.2978697	25116768.1917701			31048438.3771736	26950347.5897982	25478062.1179401	21521763.9374211	22030058.6947068	21597904.7999009
BGI0645	Neferine 甲基莲心碱	Isoquinolines and derivatives	2292-16-2	70921.5252679454	54404.7026422637	12335.0361739279	20978.2295180464	14840.0920251953	51050.2442050675			3804.51931823073		9935.97136325031	16551.3010116825	34198.1581662475	2519.46278386075	4526.59647757958			18635.1741743882	29648.0423045492	27506.2598835562	24441.1670980735	32962.7955267836	8462.83689180718
BGI0659	Norisoboldine 去甲异波尔定	Aporphines	23599-69-1	16933.034166733	85320.4952155496	20784.0183434163	33694.6521878328	312860.964654567	35893.9901237429			516682.9120558		952175.143835581	287676.97464707	507132.150744341	756798.934622121	615276.878193868			367989.074882838	351753.551747348	319606.887595201	309226.89420689	447689.263827046	404757.316210878
BGI0682	Isomangiferin 异芒果苷	Benzopyrans	24699-16-9	47436.377562174	18298.3857157551	10365.4650869784	5914.8919671351	19563.3638342135	10043.8161981876			16267.6687821563		275034.751161396	17978.3856311815	31060.6455610759	46272.1107477797	27121.1092070278			6755.40849756011	28801.341005351	29606.7281186351	10566.2513796911	24306.5483870633	32819.29428774
BGI0683	N-α-Acetyl-L-glutamine	Carboxylic acids and derivatives	2490-97-3	2212649.89770885	3200661.77284768	2808046.96259801	4369070.06003803	4120384.37677025	2415310.40195459			7907458.4943667		7643225.35341223	7397222.91116923	4741254.63445677	6189325.89930365	8057085.26570199			4671114.34399604	4595765.98224361	3083138.18869259	3695549.40261696	4187411.39119165	8543323.88995593
BGI0684	Bisdemethoxycurcumin 双脱氧基姜黄素	Diarylheptanoids	24939-16-0	56245.7154009634	36782.6579785952	13147.2851666591	48544.9584183986	51493.5984033337	17125.0986760297			259994.812557683		294504.199198065	71206.601531551	105020.076196117	132311.711596033	190276.059979935			94956.5242766042	83294.3527822284	52546.7136808896	31103.2343257089	87659.742161393	83073.2989965474
BGI0693	Dexchlorpheniramine	Pyridines and derivatives	25523-97-1	1923422.8117306	2209631.95530419	4025586.96743431	2637589.57208119	2423916.59972676	4637390.32611588			2201213.30927387		2307713.61303659	3746591.62480815	2323061.00359696	1948736.87316556	2314648.39376973			2017897.05615255	2666077.03467394	2011694.72779485	2634927.62082528	2711604.54965678	2415290.85292085
BGI0697	cis-4-Hydroxy-D-proline	Carboxylic acids and derivatives	2584-71-6	822777.516852252	1104612.21739856	943644.866552087	1312193.1953481	1812402.70001789	1080080.20160374			2212279.00261407		1878023.19068746	1376244.87995922	1579106.81264732	2054089.16212128	2232728.53842307			2606671.61013971	1761073.01774688	1915375.69231251	2334047.94590554	2441157.55335763	1748040.85889886
BGI0709	Amoxicillin	Lactams	26787-78-0	20605.8385520787	56197.792873377	25354.9097338841	39803.5335695842	32468.2901279469	26667.0804807805			62987.4858855373		87285.769362238	40200.8177001664	30531.9537217384	40977.7263426579	81531.7392369632			46202.758635671	37851.4171661752	41590.1686905594	49848.6868816061	36818.5994080717	63479.089044056
BGI0733	Orientin 荭草苷	Flavonoids	28608-75-5	65919.8089655107	30285.2082097126	133413.224260338	43701.1736485314	48218.6437590549	65264.1331328078			40869.0941476257		101641.114491351	60019.1702966059	88519.4215828636	73912.7569544953	82496.0453421019			75448.9950790913	96137.9386958896	63668.4236948328	60717.1720230045	126849.712143812	75924.5825355155
BGI0761	Astilbin	Flavonoids	29838-67-3	28219.1556654882	27170.893597779	181403.60224754	21410.2427542778	228056.071462227	124330.89663985			632518.82984768		80655.8122887448	377175.224287254	388840.086305547	96433.5822949794	121287.139160166			183737.591000866	83374.4339890601	1034438.41688444	104217.95571875	173988.613082081	368997.286841503
BGI0787	L-Theanine L-茶氨酸	Carboxylic acids and derivatives	3081-61-6	390116.537956203	197145.552252404	207476.529473365	160260.248974335	331286.310410523	281727.262276799			269024.298369973		215120.413557142	289336.905705747	305369.671788356	229695.813648506	265653.508746247			359668.673131097	267499.12427198	382099.408132788	258205.063118657	269515.386430664	261923.609389277
BGI0789	Cynarin	Organooxygen compounds	30964-13-7	745785.367870301	787431.142314204	487113.153284632	853978.296833312	400042.015137237	301586.788130703			64554.8758726591		591578.448008042	228943.260723453	881964.637920407	108730.732080338	46989.4054743417			5684.87928209976	189539.619526889	491621.771508191	523924.214299762	122489.480141921	13161.763138021
BGI0794	Monocrotaline 野百合碱	Pyrrolizines	315-22-0	258931.746187225	362081.255584506	72367.1381987942	304015.92615788	204982.353676748	167571.343097057			358167.604665607		286336.873765859	289303.299003186	324972.289038273	299618.090680444	376140.932457638			287074.746440607	221882.529409651	405044.77951103	365325.059463801	256188.060439825	314450.598372591
BGI0796	Allopurinol	Pyrazolopyrimidines	315-30-0	3596391.95011314	2794305.20154054	2837739.17577674	2126106.13240805	2316748.00808722	2535459.82053776			2530158.2871005		4466293.53103103	1846911.55029463	2079648.54615303	2634628.94981993	1814725.77852179			2153142.19944257	3173132.34076667	1925589.89233258	2615053.76261301	3180392.31070536	1852029.06710436
BGI0798	5,7-Dihydroxychromone 5,7-二羟基色原酮	Benzopyrans	31721-94-5	652780.793267078	2265572.36680468	1286934.20554536	3789455.8717849	3203221.29117541	1303172.6771383			5650182.00433535		4221882.44043544	6692730.4063239	4863390.65318261	4213073.98052642	3943446.0385977			2936551.98212482	2590104.26368935	3234179.80751472	3021506.47422915	3490620.25827215	3474506.45896054
BGI0800	L-(+)-Selenomethionine	Carboxylic acids and derivatives	3211-76-5	837241.47119622	1400097.47264505	677889.471850257	754735.454530007	543802.206194309	594268.867109683			632598.798724574		367226.652901031	754325.243547586	538489.957580631	452460.177508884	519937.951098664			791513.552841389	726399.531182476	739927.636518441	774516.764545413	503989.770704827	616677.738620625
BGI0803	D-Glucuro-3,6-lactone	Furofurans	32449-92-6	8659386.4996	11469056.9654997	8588850.91515501	8481608.75621129	1640488.59898852	7850151.22088875			4361880.39874057		7948443.62061224	5524747.46237948	5025293.41360316	8324152.8269853	4573004.56377069			3081225.9426247	3194296.27409127	3722259.50737521	4274646.19127841	3026033.58308409	3267529.2017006
BGI0810	L-Norleucine	Carboxylic acids and derivatives	327-57-1	9614061.41316228	19730418.4971893	8988620.7576363	14985246.6955158	15278235.8638754	10552030.4464841			16076752.0850706		15436255.8239661	13697815.9091296	14159849.6176827	9304105.70019483	17629943.4648255			17745358.4506114	16056071.4191693	21005068.3342677	19218826.1851713	13977198.7937882	21319406.661549
BGI0812	Chlorogenic acid 绿原酸	Organooxygen compounds	327-97-9	153036.72598824	133264.925398348	90682.5566623411	85093.5162273964	160789.955207322	42442.0735585585			140376.366888718		192590.571598231	53446.6594670212	88212.2333934554	133729.508143605	147401.198197111			117527.010476246	205355.207981731	141988.06214734	92647.5724333863	141311.536066414	152988.946621128
BGI0819	8-Desoxygartanin 1,3,5-三羟基-2,4-双(3-甲基-2-丁烯基)氧杂蒽酮	Benzopyrans	33390-41-9	35582.0980698808	53812.7254846234	73232.475360985	37428.0558298656	29890.3620030572	77095.7343576139			53958.9996842078		52577.1014432838	49602.2927418276	32220.1214570022	35075.5627868877	27875.1145126416			31939.0739980991	26409.7022664893	45988.5850802544	60120.6580196347	40240.706787144	50203.8411629518
BGI0821	Alnustone 桤木酮	Diarylheptanoids	33457-62-4	5461190.48670711	5240746.60855555	2706753.40806494	4542337.12074452	5362118.77825878	3508428.31812645			6267441.7728607		5037867.36545713	4172498.96828876	4910789.69965452	3823253.37435992	6677735.14483737			5327488.64073841	4695440.99087271	5473332.80426866	4621827.28313971	6030521.01225659	7517362.60305247
BGI0824	Bilobalide 白果内酯	Prenol lipids	33570-04-6	5924.25080719639	4060.90610555164	8904.21322260408	3544.17470384876	58586.1489515034	13665.0075599188			105410.97507779		197431.264972604	59705.9078191549	126946.202926157	121233.313347439	144365.514704782			55428.544442592	30341.7795008104	51518.0228272997	32955.4103061723	87924.0550511554	91879.8795304473
BGI0825	Acesulfame	Organic sulfuric acids and derivatives	33665-90-6	340417.158216377	334133.928178518	359413.543262379	434817.156850023	252797.455766683	823207.998460961			335710.344811857		348783.61114467	365656.5269842	250341.055152212	479158.819252686	245111.566015414			199851.87287569	616536.213508936	308837.948528431	227246.980533768	259155.065695327	473561.964647738
BGI0836	D-Proline	Carboxylic acids and derivatives	344-25-2	22359547.7562413	34738718.1418801	20234948.6419639	33036585.3479753	319147385.69026	16448095.5659657			541989958.800318		830932627.591874	107054448.669954	361959176.334055	379467787.653774	658696025.802064			147715887.723006	205672048.826667	302059396.432152	168661980.210888	186233834.656799	536082768.784722
BGI0845	Ipriflavone	Isoflavonoids	35212-22-7	1995971.77260715	1456035.02435251	804251.26000213	1511939.21609016	63751.1766028538	1241221.79153488			86577.3049582979		82462.1080571451	152822.879181617	80741.2707810247	422310.712636532	65979.7386477039			116732.370822665	67215.1261970298	90892.8258750494	157209.277208109	1768139.68964971	100035.156321435
BGI0848	Methyl p-tert-butylphenylacetate	Benzene and substituted derivatives	3549-23-3	5256441.75351041	4169552.50263334	3500302.09310402	3071066.65481552	1784215.16157317	3965629.38953104			1973232.03735877		1712300.2601664	2874959.78548987	1961125.86268776	2024005.69078192	1604748.97900912			2117377.5863787	1775801.66128203	2133266.95680602	2640059.62963427	1943064.56599623	1542496.96328525
BGI0863	Puerarin 葛根素	Isoflavonoids	3681-99-0	65232.2414953647	89867.5661365546	61131.0271326791	137386.159717125	133199.322148171	49750.0369129814			160651.476014223		149889.381063367	121575.847235414	136003.2410566	88220.5806725588	142284.733623303			65279.9389743373	65447.0411248465	231930.291500616	215028.385364742	63025.5946996946	125320.872845513
BGI0870	Betamethasone	Steroids and steroid derivatives	378-44-9	72080.952766623	125702.202725016	129493.990149986	147515.263445955	193148.188516418	105935.529655433			223906.857637355		170123.479368247	210961.27437414	149497.644486862	133147.274876697	182785.590039131			215289.059593367	97568.6029527707	130884.304853354	177880.475804885	265202.619067427	124362.831354991
BGI0892	Methyl vanillate 香草酸甲酯	Benzene and substituted derivatives	3943-74-6	946601.292176137	2090307.09104071	418252.488678642	1896842.7775475	695038.618098601	463951.599395854			1473948.35369317		654329.0733598	758002.776999348	788357.924690402	1026277.14013662	1181165.55398873			560003.352740076	622670.074036708	855272.964612202	1089142.1104828	730404.473199615	1021654.62313877
BGI0928	Dacarbazine	Carboxylic acids and derivatives	4342-03-4	14610885.7789746	13403735.5496312	14525637.2000138	12153724.8345355	14736582.058499	28609219.5020257			11937453.0598329		10336607.7646815	13485092.6833497	19719948.5536689	12788654.7173402	13944785.2777029			15198866.7083197	18588231.9808773	12886266.7011611	13140054.210591	11688653.0832136	16374595.1606151
BGI0929	L-5-Hydroxytryptophan	Indoles and derivatives	4350-09-8	1146174.97273339	529061.710934545	816809.266487788	451471.683648431	133704.513518035	845264.475452042			380742.818612775		473582.064884203	473143.964409959	373829.795756633	525693.839720623	497375.923858573			241825.943966081	294138.272692875	368376.34899694	537981.066789172	383424.004447198	309302.667273309
BGI0934	Phosphonoacetic acid	Organic phosphonic acids and derivatives	4408-78-0	2843051.04390843	2805408.34798758	1830138.99147672	2055842.69038638	96124.6955812346	1510277.7353774			715750.436918926		909092.076378961	1457138.61350421	815982.073295784	1145708.40426856	875490.77723533			582463.094538119	296167.296528892	517500.61732756	1032349.00641196	929110.994870431	567071.748241887
BGI0941	Genistein 染料木素	Isoflavonoids	446-72-0	511669.607265236	502611.48518085	386440.730334239	372433.493442922	229595.338359211	416255.947031004			293964.591851281		208741.455399357	340265.462959389	253459.425466649	276574.639135112	260069.424101951			275455.327251749	278077.041884492	225808.413994959	298813.748088064	227198.334372182	213140.794574497
BGI0950	4-Guanidinobutyric acid	Carboxylic acids and derivatives	463-00-3	2989160.09429411	2133471.37717039	3369711.8322547	3158880.78332397	9169233.2987211	2591268.93748513			6623181.32250161		4838056.98933349	4177970.85960944	5340625.28041241	4728985.87559826	9008932.33079085			7661565.82066768	5562736.65705928	4851969.41853244	3964811.84697808	6408477.27646663	4782639.33600831
BGI0963	(+)-Nootkatone 诺卡酮	Prenol lipids	4674-50-4	584503.610118209	531921.503966623	504438.477387758	491645.344260627	264787.534753718	546788.490294291			361170.435992975		227347.646450928	442845.12157175	378298.153336688	409658.049302458	254192.115172138			288788.370339039	300550.167972457	324963.97923065	410823.170880829	308964.08522771	310915.301919586
BGI0968	Isoalantolactone 异土木香内酯	Prenol lipids	470-17-7	1631133.45046514	1463015.77914381	11849455.9415364	5192608.6804441	9647505.84069126	9241636.77161069			4484407.71230656		5370458.85726452	9516843.25083778	9982311.74538182	9896577.54442372	7674335.2459227			7430711.34399689	8801700.24878582	8474375.89750159	6413120.06184911	12727690.3198495	10896587.1072497
BGI0978	α-Cyperone α-香附酮	Prenol lipids	473-08-5	20274028.5059746	10529756.514217	21833798.4055562	16223118.1426837	22326971.569607	36840563.8430359			10107487.2646516		10864934.4859311	38765957.9299819	23969628.2505226	16230558.0748171	15725391.0338237			28079005.9936371	22313703.3007279	15635066.897897	14327554.5208995	10330439.4186057	22330690.588347
BGI0996	Rheic acid 大黄酸	Anthracenes	478-43-3	30133.5592098163	90086.3403035086	13676.8396570182	66302.7256299927	50590.9796320634	14029.9780278728			53852.0413113621		260914.26930341	35888.3576178621	55221.8626187979	106792.438151563	107797.11226381			85349.9331589206	79456.7533761919	38882.0008849043	33176.1204874191	45036.4966496297	62171.5474389667
BGI1003	Aucubin 桃叶珊瑚苷	Prenol lipids	479-98-1	149622.000149111	115258.238571865	171113.787802042	118475.167089805	211206.678209538	169022.670973531			123929.767744511		84346.3927743548	127114.951961223	114446.287076442	124139.157622868	104204.04616461			155259.765273806	180011.755491597	131934.538970894	98755.8758278934	91340.5783550919	113409.086587829
BGI1004	Astragalin 紫云英苷	Flavonoids	480-10-4	417155.080570712	315545.273470007	362269.686779303	491623.922116681	296743.754960623	328506.211474092			334990.624919811		228646.565839719	195765.043619324	259697.989170831	106896.750510168	270418.617106215			124895.39895108	235393.75864319	275610.15679428	252065.939833975	183918.960031959	155107.328492014
BGI1009	DIHYDROKAEMPFEROL	Flavonoids	480-20-6	13836.0916121258	82865.3628975101	47373.2280172351	130579.868538041	87092.3936008176	19590.0750006097			165835.458458875		9769.23636924413	40378.453127993	34846.2614382629	22740.0941759193	48838.5137238232			26390.1966127003	22236.4816228323	77331.3412188223	75662.8303774358	71385.8858572161	21946.9624884414
BGI1014	Naringenin 柚皮素	Flavonoids	480-41-1	1644010.4143458	1653220.61370736	591515.020139559	1888327.47532922	2666004.91559248	529080.294269069			1343418.15477203		2425069.05250067	1375218.67529171	1850780.5835168	1850230.88105217	2570303.21084425			2899508.95123196	3067661.79221395	2542858.2626464	3034741.13158391	3127402.22970394	2637160.92682744
BGI1024	Isoquercitrin 异槲皮苷	Flavonoids	482-35-9	76264.1363665029	69933.3788064506	8454.29098643434	37974.3205004722	25533.9462568753	20391.29923104			495576.126610597		37164.8715940991	177226.146198987	40018.3260872297	1364931.46999548	480639.912670362			4314.17445177803	11699.0545081563	52703.7999805215	24554.5047587137	6726.01850110297	1105912.1107588
BGI1046	Ononin 芒柄花苷	Isoflavonoids	486-62-4	198306.399337769	87172.2112038205	488826.573953939	258222.523117352	186245.944550845	271820.310004094			375968.676662205		778803.02135831	389529.288196844	400225.191604383	360338.527506857	585947.610591829			152396.925348251	162432.580908775	44750.7450391545	66025.1524629904	168480.853639777	408582.903347277
BGI1052	Harmol 哈尔酚	Harmala alkaloids	487-03-6	570472.996616771	344682.27477734	352703.198642691	281636.926449628	274435.08492285	328366.496216828			522505.645904642		489758.945001599	361318.861874974	303514.692662404	720324.734700467	318624.518668865			293648.495261859	598854.462998262	344742.490808311	237049.693989145	314757.56318113	372073.710202911
BGI1054	Curcumol 莪术醇	Prenol lipids	4871-97-0	48349.2822704351	230728.101828103	287530.834609903	197102.766203028	116947.59856452	120169.37790564			59471.854135086		21468.4751153448	187084.912443364	105241.579846046	61062.1130214363	66286.6410340025			190144.2517776	88582.4117996437	147860.396845581	168804.515243613	49154.7520623017	126156.383707633
BGI1062	D-Fructose-1,6-diphosphate	Organooxygen compounds	488-69-7	288691.669292816	166339.861710853	72429.5167979092	421289.072948529	33871.514568296	87150.955882925			181711.279744251		93179.7617578868	190882.469832846	60361.1119122196	199614.471132795	114924.257652588			41557.3224212143	45641.7889498713	35047.2999018885	43156.7939538021	22544.77268171	54272.0224965219
BGI1070	Dehydroascorbic acid	Lactones	490-83-5	10259746.9723677	6462816.24536764	6916955.81199909	6042047.86299921	9482619.3261156	12295602.7225081			8443494.8742418		5506883.04292484	7481602.13986563	6997967.54682983	5647226.28016281	6299401.4418481			10970037.33249	10905082.634607	4757815.48107703	6065474.68325519	6964630.68505278	6095083.81094004
BGI1100	Hydrocortisone	Steroids and steroid derivatives	50-23-7	287532.241794139	551175.060555093	536730.68366577	709147.942095176	738181.655371622	251390.517794012			1010521.71481588		699464.056952335	787928.345391246	712033.965380807	734219.566631399	784848.567996182			650465.014330713	425196.116511594	592388.593360107	424624.516538796	779380.53485757	642027.598695142
BGI1102	Estriol	Steroids and steroid derivatives	50-27-1	205001.033865017	376637.602117786	181427.491923797	607520.101099287	665165.070331757	211108.328059478			801243.16398435		2016744.01642651	558927.473177688	598461.84291458	490480.967808633	889639.062731825			1443479.44524641	1184913.02889143	1036366.53900792	617769.785689916	672955.508202232	1162977.66711223
BGI1119	Serotonin	Indoles and derivatives	50-67-9	787676.908607404	424304.632376473	465258.081122369	349529.65120801	340215.434123268	433389.599702376			282793.939360154		249113.734566327	394283.43636996	385220.370281393	183988.905578475	317726.893305039			432688.091469838	378524.969127841	280153.092579636	330314.658416019	386090.400324556	266796.874516169
BGI1126	Thymidine 胸苷	Pyrimidine nucleosides	50-89-5	351333.495529508	600500.770772385	436922.270673331	804331.288120836	1143113.55611308	326605.798842128			505180.388725563		400166.674888942	834186.771228176	804380.933572943	444602.689435178	978574.074017105			1678311.9773957	972209.245446834	1237657.82099232	1070952.41014004	930598.22021494	829128.578851305
BGI1140	L-Hydroxyproline L-羟脯氨酸	Carboxylic acids and derivatives	51-35-4	861471.965151141	828985.364966822	732964.466051837	1322102.12704194	1436363.00707519	823722.663847412			1282322.93243599		1288613.1940262	1072829.16635884	1438817.52154147	1833212.0004222	1366664.53727051			1828923.3921287	2010877.79446442	1626631.325597	1682883.31792697	2268832.06398683	1127928.15091694
BGI1147	2-Methylmalonic acid	Carboxylic acids and derivatives	516-05-2	711468.625060605	1698288.09209989	778034.994718764	544661.580168065	747334.714139389	867885.516135738			928949.461940179		2116477.53915848	630300.90798267	530175.822638222	750780.750177698	831160.90748181			1403820.32072629	908217.16287757	990158.033108183	1348328.439137	517813.148703566	1378148.02941085
BGI1150	Tyramine	Benzene and substituted derivatives	51-67-2	135219.676502748	207293.527826735	136800.249471858	169436.067297597	259933.570472315	197467.556819697			127061.548885871		121253.094055154	165241.756017576	164398.550517292	104581.654796227	93795.8663507227			156029.147432286	176346.915542995	189076.251325018	295599.531799906	213652.298771856	124371.054887099
BGI1156	Acetylcholine	Organonitrogen compounds	51-84-3	4138260.59920439	11411916.8708223	2590187.71438259	11559063.970399	3473307.60318672	2009661.4091485			7111971.09029679		5047808.71536857	6540776.50045138	8726228.35426845	9713697.7559643	7500759.29211642			5119109.44893957	2833169.62198925	6370947.25890166	3076640.27518061	1291580.75737044	3787607.57571429
BGI1170	Tricetin	Flavonoids	520-31-0	5117.2738604424	5959.80867885185	30454.0284104745	2274.31761553223	17557.1197405771	32402.5343580422			10515.9073115574		990.549292348574	9115.81806988605	19265.3483179263	3660.51225758222	2963.01858192461			3474.84846070931	2354.74739638863	46250.6947916404	14485.3483818309	3628.71815909789	4725.24154895774
BGI1175	Medroxyprogesterone	Steroids and steroid derivatives	520-85-4	831891.156260462	1570137.90653941	502245.935989078	2717789.31853618	1206061.47079502	1376142.53440896			5055790.33576879		16919349.252856	2378129.09697074	3566480.40208288	4137089.87816534	5552328.36868691			3863210.61971795	3043401.68548814	1639261.96172341	1134371.79059831	2042545.79522017	2129498.44158962
BGI1198	Tryptophol	Indoles and derivatives	526-55-6	16578.6576555093	52537.2577923163	3376.40757762778	18493.2608203848	23379.4311711759	4031.78313817949			173635.422788921		24282.3522453739	14597.3113055898	28484.6401507868	61008.8924303112	31982.8191537691			28944.1179443203	26019.1939095797	20597.1556077434	6029.76238406344	32020.0175080182	21540.7200023319
BGI1199	D-(-)-Penicillamine	Carboxylic acids and derivatives	52-67-5	367900.597429216	921847.134407963	442503.164487767	994467.09706519	880922.292287395	500134.999695357			442702.704430225		393951.762451066	534435.388446405	762587.843673317	725692.563521341	634724.572862132			745080.562423446	801795.537520112	772350.248762479	873839.328676508	621538.275030732	669897.14900739
BGI1200	Mucic acid	Organooxygen compounds	526-99-8	1852618.76997996	1904294.71306219	2913538.46413109	1940766.50346924	1268175.55221746	2336411.20024556			3115367.5293777		3332938.40559025	2344156.3213989	1798564.06054334	2204520.35617175	2183863.52337899			1658971.53624271	1974339.16921698	1347958.4347779	1104967.6269922	727845.105429028	1911388.98891578
BGI1218	3-[(Carboxycarbonyl)amino]-L-alanine 三七素	Carboxylic acids and derivatives	5302-45-4	247634.068932669	120085.569210013	115016.846338365	104803.078776234	39530.2693375469	183926.582192247			76807.1074237769		90996.9676159241	134990.922754455	104731.118759789	117666.469330237	78056.6467570083			88282.7169170647	75597.5590379761	60719.6894417413	72567.9168899519	60569.5323191202	66379.528818364
BGI1220	Sinapic acid 芥子酸	Cinnamic acids and derivatives	530-59-6	2139205.36575773	687564.309840986	1311443.6861806	723346.063054516	764665.605974551	1191026.94686408			616968.881735647		1897953.4010194	855352.992645219	956979.629158815	1448861.40661153	932760.985210025			978288.843349283	942747.459432331	963339.362399015	616181.070060941	824685.067113719	706415.388037074
BGI1225	7-Methoxycoumarin 甲氧基香豆素	Coumarins and derivatives	531-59-9	8301720.44989167	7622881.27955472	5500296.6827666	6369474.62213204	4002335.44573376	6438505.32881003			5909848.94449777		3389941.15577229	3955397.26926083	3000293.37288455	4315316.05813679	4019344.11007503			4705752.08420153	6794121.0802118	5458827.00654265	3293930.44280813	207919.314965741	6417978.33208059
BGI1230	Coixol 薏苡素	Benzoxazoles	532-91-2	534307.332878951	56004.7568437117	76898.2134621673	74374.1134209606	121838.248452207	42424.9655678731			119647.434386839		312925.726761652	65513.8661654589	138252.915986746	109653.577130446	108167.275866226			150718.273366114	521366.447605753	71990.4070313354	78821.3720252791	205131.930793774	500254.727515405
BGI1235	Trigonelline	null	535-83-1	4640743.38060801	19931031.5484931	1616045.02168023	32623780.6341483	3935232.12185674	1623261.7571952			14741169.8806232		5988695.18297017	9477811.46629102	9899893.24531738	18136813.2077348	21398379.9136787			4102032.86465117	3901904.61512236	6911772.94763457	7691695.13600206	2137355.0149138	12687048.2341718
BGI1241	Feruloyltryptamine	Cinnamic acids and derivatives	53905-13-8	158787.640458425	54158.7604415049	89234.5768403317	65339.9192715596	231079.57684677	59398.9436595156			463158.743139703		1337698.72126704	252704.399674017	627029.432991883	891663.105768513	593060.222998526			309945.40825511	409250.058674835	170362.336040862	91595.7194074441	319199.69495168	368785.11971313
BGI1242	Hordenine 大麦芽碱	Benzene and substituted derivatives	539-15-1	135514.348275667	124014.924836089	106034.328065808	127668.837199688	121459.928137407	127222.147065673			189020.43509236		129386.3553488	164455.599225506	70678.8066181864	153573.337750498	143109.694076724			168305.261493785	212789.263384468	96771.4440252765	212295.357039303	213460.578858859	97024.5212168865
BGI1247	L-(-)-Nicotine	Pyridines and derivatives	54-11-5	66653.5994588598	74155.8632183147	138833.526362159	83824.8492581879	27489.7476418717	61413.4095627149			47648.4556863122		27226.2109567519	105822.705409574	38402.1698266343	52767.1516886831	39193.7429098378			145764.889999841	246173.228956043	49278.4210125468	49818.8611814376	63377.3914332517	22183.8002131368
BGI1248	L(-)-Carnitine 左旋肉碱	Organonitrogen compounds	541-15-1	1201326.74325188	2123866.76227215	375270.979479948	1265237.04593898	31960.0416242257	234161.345507979			284681.204854852		476006.893694884	859134.946922797	630145.980231012	802621.863580805	555343.714973156			652745.960426812	151972.535634408	235023.545149369	240717.260919864	911402.031256347	327388.681437289
BGI1251	5-Iodo-2'-deoxyuridine	Pyrimidine nucleosides	54-42-2	139358.563038725	73245.0191375976	81798.2515032844	54019.5063155457	89163.6017889145	40172.4134609694			80335.7341167234		89133.3006667904	70814.1232552044	43704.5843601275	75086.8031947144	85950.6206708836			57851.3210881075	74234.3789441554	68707.7521870262	52153.2193146249	87694.1772913973	80312.6592680666
BGI1270	Isorhamnetin-3-O-nehesperidine 异鼠李素-3-O-新橙皮苷	Flavonoids	55033-90-4	63069.38920132	36026.2427216104	17975.6541790058	80168.80335818	76465.0320305266	26183.7797439195			241913.849491956		391729.525622349	37046.5886168667	96915.5949141349	155643.618745263	232526.858414574			99351.3284242835	97616.2917613334	50641.9300933522	45085.5225646979	99015.8896292854	137277.888529788
BGI1278	Isonicotinic acid	Pyridines and derivatives	55-22-1	40191111.2710192	35823194.5565398	31139489.5824939	58100734.1681046	49828246.1346864	35712505.707221			22942602.9629508		33248822.3682072	37222855.7718033	22544898.5434242	40560068.1740975	28169976.7507268			46236063.5572889	42799600.7443307	31315137.6741845	34309262.4649805	29044632.4170952	22390699.3468417
BGI1281	Eriodictyol 圣草酚	Flavonoids	552-58-9	15933.4612899661	18853.1855639783	15398.2235517443	45824.346137338	42821.2739345748	14550.3460778854			220436.208380157		172006.867660757	34792.5390664723	36842.5289005888	55702.7994951419	129537.598575675			129014.31353688	76880.6579249651	40029.1796902166	23255.0984213731	51710.3971161316	114961.689449721
BGI1294	Glycylglycine	Carboxylic acids and derivatives	556-50-3	382372.255610385	821043.71971674	704154.843690373	1010657.47741145	1057501.5795825	667090.455127742			519226.921951989		365027.723114488	800647.282071507	623525.482249792	498556.660305951	620937.902155064			673834.997394533	827183.979452286	822510.148324961	1040934.83130047	893625.128061443	368318.845442636
BGI1305	N-Acetyl-L-carnosine	Peptidomimetics	56353-15-2	784938.194482621	3589134.62842873	2527137.54992395	2342701.85948225	2391001.20377223	1902994.51289127			814327.071855165		640977.72389352	1905950.12502005	1151951.15259228	706439.482475936	1239782.20000917			2703865.36561704	2564266.82712561	2390913.62201039	2650918.17287561	1539158.17395082	1744770.36017972
BGI1306	Clareolide 香紫苏内酯	Naphthofurans	564-20-5	52474952.8736945	31019056.8398813	22775944.8585253	22742876.2453071	2405621.18215972	17857933.7136953			11995192.5881722		20217948.3175032	14846491.8024523	8883689.19170092	33326101.9018954	10651928.699112			8844031.39720775	3608819.09537322	6614663.51105466	11388365.9849454	16509856.0716423	8425499.58897959
BGI1307	L-Serine	Carboxylic acids and derivatives	56-45-1	5021944.65296392	2287930.22872947	4145871.4873873	2461025.88144533	3413351.09398383	3967896.19829685			2903092.14488458		3175207.9976851	2407370.52891763	2434546.61637311	2744966.94375225	4276702.70557822			2898779.39820037	4886684.81046409	4123759.52233054	2968713.99074091	3412452.51316247	2277710.33840951
BGI1312	L-Glutamic acid L-谷氨酸	Carboxylic acids and derivatives	56-86-0	810256.855442115	778821.735391131	729228.386126121	627145.165191451	879302.011343201	1159856.18783539			789016.922318222		728265.286105156	799765.10612926	676659.012103206	496323.524302343	648889.955984605			906051.435916573	829446.948386913	521295.822326669	460722.561452722	500483.902198718	689199.423570066
BGI1315	DL-β-Leucine	Carboxylic acids and derivatives	5699-54-7	3899464.75750001	3803683.45117785	3039849.81852198	2668163.73196765	3784337.34466096	3007024.47578859			10584835.4853852		9312175.41156172	4251999.22391681	5412753.43190051	9039459.9243545	7427574.61388174			5153972.56371674	4967584.82514093	6235783.92324633	6597935.01294317	4051119.93867235	8649276.6999819
BGI1321	Isochlorogenic acid C 异绿原酸C	Organooxygen compounds	57378-72-0	25838.6699705289	73445.2046498431	11244.074291534	32897.2723854222	107518.633466161	19272.1515070404			24051.6393368233		24121.8922242604	25733.1322473149	96795.2719438029	31266.0328741553	19920.4440265457			10207.9137895257	29416.7965724621	99976.0045377686	116307.306187045	64363.9113739143	4865.04159478489
BGI1330	Apigenin-7-O-β-D-glucoside 芹菜素-7-O-β-D-吡喃葡萄糖苷	Flavonoids	578-74-5	244319.492977148	127679.749606698	53550.0365338545	191604.415923719	144327.28938754	34958.7532996107			715435.559466156		534636.654705532	149057.728255319	250440.412756501	243691.764702577	817320.379252912			278574.627896797	209449.247207398	165370.582256557	57341.8969539368	202506.484800746	108469.210850866
BGI1340	L-Anserine	Peptidomimetics	584-85-0	184695.644963758	129351.298633948	137016.583762405	73275.6334842069	30571.3385696972	152604.702579162			75415.6489658217		81323.6486894684	104630.867708007	82918.9342365026	97999.3320858789	57714.7462501139			56541.8171113012	39013.0445596554	80728.8934708622	98589.8460969555	79375.7666973945	55447.1652346807
BGI1348	Maltitol	Fatty Acyls	585-88-6	10800488.9352684	9148751.01985407	6144821.56731576	4590188.23972291	50464.1085769991	4982689.45611353			1812217.70256564		2202801.44481874	4288967.79697416	2018192.67751832	3771117.41888198	1268058.25385098			1075001.73497757	434125.620967751	987042.338559482	2428918.52719149	1823594.20914441	957041.509017095
BGI1350	Inosine 肌苷	Purine nucleosides	58-63-9	1303302.4362751	4412879.42266427	1948580.02474523	3499015.63429284	2625783.73400325	2337881.06177861			952967.114504322		878338.434231809	2630579.04589679	1642631.87175668	1102875.40811928	1804077.37706291			3623670.47905856	3591365.89122811	3454440.83104267	3920732.44469907	1993795.88860521	2208516.71690397
BGI1357	Uridine 尿苷	Pyrimidine nucleosides	58-96-8	66963.6789061806	228669.050845007	111560.806506548	158874.950332535	234518.088152397	141910.782734931			191171.597880808		172188.841874646	155936.300126092	170299.845289483	84956.0296129471	211928.493518015			223145.112012086	201928.812075943	251586.724582564	208292.748076691	152112.068058291	203076.013628153
BGI1362	Acyclovir	Imidazopyrimidines	59277-89-3	157433.691070434	100383.025115508	92847.2267720545	160165.039445689	305380.158106562	53880.1909976016			9924907.32298207		8303530.89023998	144644.44806533	701954.182002542	2732218.48335415	3749305.91514682			251220.760701759	403925.108314947	563631.028895482	262197.730181212	501592.341113179	2072662.32178198
BGI1366	2-Hydroxyisobutyric acid	Hydroxy acids and derivatives	594-61-6	82731.5076963356	49760.398758168	139750.624489573	70832.318955328	99656.4494694989	154791.674055105			38596.9784328757		32478.3632679468	70894.5392934772	89030.7942067745	13749.0075112502	25272.8558388452			140350.071626905	92271.5460469473	98516.4484051882	101078.303681013	170630.72256707	66299.7605569215
BGI1371	Nicotinic acid 烟酸	Pyridines and derivatives	59-67-6	816129.105348207	696741.385680927	595898.775732682	1250452.19625936	905739.340654811	768338.395335391			606307.031223758		692589.375936026	681464.712154244	538042.392592502	924948.327869953	579441.109026039			979698.405864376	1233470.13368551	661228.298038824	870409.373157132	1022368.77235549	469179.644387662
BGI1373	2,2-Dimethylsuccinic acid	Fatty Acyls	597-43-3	1733916.12043512	1311282.3103443	1309450.2254174	831445.77176012	1148576.65431549	2233470.99462595			1307491.13721645		1454152.35748398	1287988.87807445	1646793.04114733	785252.791461228	1485622.97977253			1336451.78119548	1841682.40062815	1533127.27660407	1509654.65715837	1291749.21030371	1423277.12891028
BGI1374	Glabridin 光甘草定	Isoflavonoids	59870-68-7	663273.41953418	587245.6300687	4538263.40151796	2079837.8718434	3903470.02964975	3556945.15404419			1845811.62813783		2082990.69810421	3982783.13113056	4045902.71968237	3969680.25113415	2864353.31169546			3005926.54963198	3440262.55161393	3511662.43300061	2692730.82194182	4982810.77625553	4493790.23779273
BGI1382	2-Oxobutyric acid	Keto acids and derivatives	600-18-0	72922.5969807793	26188.55469126	26724.5845059407	34858.5886755306	34044.2426312148	36877.6995881502			27137.4383739695		22875.8618927088	22682.1237504551	39321.9113195507	20179.119330981	21335.2725761952			42849.3404398733	32516.5691290379	28973.8947401178	28769.8703825272	35074.5066073153	25705.9390147703
BGI1385	L-Tyrosine L-酪氨酸	Carboxylic acids and derivatives	60-18-4	1784564.99810991	2353007.67896745	1829789.93676253	2483746.44533759	1940216.88087701	1817759.6519651			2534294.67725784		2015765.12065525	1924929.51029183	1414079.30114875	3286388.53256215	1373178.73276799			2090117.94906923	2953197.85419737	1659951.57383894	1946733.39189752	2683149.96412299	1108814.19523953
BGI1390	6-Aminocaproic acid	Fatty Acyls	60-32-2	92272.710069174	71976.7009278708	83506.3633556456	183443.769199645	103598.623578061	62409.9500201362			133726.954774984		125448.361646277	140318.785349876	194210.389492346	216772.789711517	178486.391987054			221353.77274411	165140.04553076	224853.329293197	232443.611693124	148909.600967895	173245.973261482
BGI1403	Phloretin 根皮素	Linear 1,3-diarylpropanoids	60-82-2	11107773.8156446	12253734.127124	21311061.7633599	14982409.4515621	14393050.3984244	25579052.1918375			13074075.6974009		12629177.1788539	20643373.139544	12854685.3931257	10860240.6591017	13163322.8945316			11342070.5209155	14613023.3684722	11282872.4786416	14974208.5088226	13913332.7957806	13100571.8356092
BGI1404	Galactitol	Organooxygen compounds	608-66-2	8390932.81063294	8358172.67530807	9334683.95348384	10309744.7675305	13614026.9632906	11950538.8273824			6073067.42146029		6583004.14061124	5640139.67634352	10104580.8486051	7664151.50350145	8879294.71110321			13309032.9238693	10246858.3043147	7279324.36914945	6925601.14918423	6965317.52629448	9723182.00142518
BGI1409	(R)-Mandelic acid 扁桃酸	Benzene and substituted derivatives	611-71-2	558195.006078449	593940.405556796	666502.059501182	403958.558496734	995006.120711398	345637.012813683			962059.575807167		1101902.27202844	647507.539694308	760616.187727649	518845.414054649	1043860.50393142			732526.615915829	845070.881818664	902277.673642075	842921.013691844	709357.163333496	953941.237412576
BGI1412	Verbascoside 毛蕊花糖苷	Cinnamic acids and derivatives	61276-17-3	15168.855447815	20157.2511866062	35011.6477585774	51352.4493943486	60967.6562260828	38970.577115324			46027.0867072869		51081.8650454219	38694.5172817718	38639.1696166822	28298.4527130215	40247.8115513592			55669.4620881765	44346.093019111	65234.798511163	39559.814513482	57293.5415727687	48800.9065854158
BGI1426	L-Leucine L-亮氨酸	Carboxylic acids and derivatives	61-90-5	136390.659757226	184718.321631506	91327.5779212747	197582.384203582	220449.922426086	172320.236178131			256434.198313979		176532.019541097	222991.273651884	236867.617087993	383310.663460082	273862.078978111			334737.582581574	313041.936449363	292926.45282971	405081.723598395	301439.543982184	170315.928771587
BGI1437	2-Aminoisobutyric acid	Carboxylic acids and derivatives	62-57-7	95270226.9008714	108514377.596166	103939107.899382	133299395.430475	110209320.916231	114321638.582846			130260439.908721		136577000.9716	138134474.508255	116507835.219399	128612556.931647	119493953.825733			119939878.412145	115819639.065556	124565335.206911	111578469.262651	111699088.83049	114630182.423404
BGI1439	L-homocystine	Carboxylic acids and derivatives	626-72-2	131229.088832881	207988.45753353	126137.490635906	413892.48269184	200327.867379512	130566.759244658			163580.336130465		975667.745921173	210041.891011199	151028.116207978	139003.668724099	297087.494106134			280194.993351777	203642.909817678	237899.570886631	191347.773620965	192846.965494956	244810.439073612
BGI1443	Mulberrin 桑黄酮	Flavonoids	62949-79-5	17377.9307650628	66986.3620868936	106697.930184053	267879.149560276	109603.598756614	139077.984610616			25483.0822332255		12293.5683215098	171158.936147206	81975.4927645815	84817.6560760219	56460.6353846541			73734.39973854	53206.3137345252	122375.613229289	278932.930545753	96450.0071043731	113047.2511751
BGI1462	L-Phenylalanine L-苯丙氨酸	Carboxylic acids and derivatives	63-91-2	1380275.32566405	1706704.4629933	862769.021993162	2213247.84362044	1046704.54708315	542753.85582433			1020811.71005021		749030.964256518	1504545.66842512	1533556.36453779	1797341.3220039	1349637.86644068			1855839.13892793	1176810.43037997	1471705.63581198	1847213.97814531	1184555.442638	1184365.42941736
BGI1464	Traumatic acid	Fatty Acyls	6402-36-4	905645.767658897	367456.236588298	518318.379292959	735843.503808417	2485213.66212593	370138.506806877			1782003.46165317		3580098.83073755	1817233.23121443	3115178.10957258	3479588.85805255	4730261.6884626			2830858.10810368	3565595.0390386	1106312.13123605	778833.5375498	3476242.19547658	3248486.79075252
BGI1470	Imidazole-4-acetic acid	Azoles	645-65-8	27756135.7901442	15908582.5097404	20108734.1734823	16113946.1366617	24690505.9542413	30464096.3654486			15789537.8660401		18804711.4725538	18920502.7281656	17655228.2596759	13359896.8677693	19091735.7735104			22007844.4101061	27980591.4158993	21881295.7136148	18251865.0554288	18152564.4042327	19016210.7747852
BGI1481	Deoxyadenosine monophosphate	Purine nucleotides	653-63-4	1046082.86790569	930806.865977466	2437531.3558974	1791583.88315287	3387528.24857747	3106045.52587537			1038184.94855542		2048303.54437803	2022328.93575216	1676654.1031557	1487878.48637714	1743479.97107297			2730215.73310285	2280349.25587545	1997828.94453533	2476312.55894923	2979118.97583044	1343335.35094026
BGI1483	Cytidine 胞苷	Pyrimidine nucleosides	65-46-3	1383327.97115476	866767.520610129	1050561.78543516	719738.812037939	1175596.36762685	1639264.85681545			910155.776259134		799630.5528139	903995.093885281	770811.736387976	708944.043494282	976433.451244705			1238222.46841898	1181725.07702845	1132442.31513483	671551.48823374	887154.11565821	804135.620070253
BGI1488	Orotic acid	Diazines	65-86-1	1352476.02912599	592649.209002813	970289.818803838	535200.133258865	541329.749187485	245399.86972236			1438055.32291027		812549.825575283	428593.479206795	659408.162000687	759416.323293652	1089259.83018984			680907.096022983	526659.905356213	304213.327867266	843801.86603682	434921.276028979	504912.536101082
BGI1489	Glycyl-L-tyrosine	Carboxylic acids and derivatives	658-79-7	163072.899901211	251939.18674703	157107.801494374	192631.488713988	220942.120977058	128821.744194753			120191.222749718		64261.1009695022	162664.842074713	152678.910899427	74413.030511071	125857.334583989			61214.4537050982	138949.891741427	201644.950567571	162521.234408118	129591.493035503	70462.5125097276
BGI1493	Uracil	Diazines	66-22-8	49160010.9859057	50370644.2736972	30847624.0988476	89134018.2040769	17830797.4205869	41663999.2908572			43225305.1333174		9423383.17044035	69020672.7672493	30694754.3467482	50234026.1146687	28360015.1537056			27479284.2584076	17895819.2737897	23515147.6231789	20449406.7368031	18476098.272169	11518443.2040384
BGI1499	Pyridoxal	Pyridines and derivatives	66-72-8	2423174.58284664	2598106.24078175	3846889.53462497	2619214.1330525	8615595.52862545	4007553.94637137			2475401.59786927		9134572.16450537	4342422.85811682	3577776.17669163	1520072.68636052	4369768.5032997			3092010.89303308	4061797.09213354	4641973.76027643	3644520.61219869	5961945.77755107	3561647.11693745
BGI1510	5-Hydroxymethylfurfural 5-羟甲基糠醛	Organooxygen compounds	67-47-0	31232442.251935	16889954.8062145	25414355.2116364	18578804.201635	27162759.6616641	37396564.9863142			18408945.4181982		17767255.8614075	24497113.7342735	23722539.56172	17241342.7008772	21538818.1036964			28744756.6497149	30434716.8905996	23179810.5623566	21708667.681717	21752193.2545897	20520199.4042707
BGI1529	D-cycloserine	Azolines	68-41-7	138517211.570382	102389055.53579	91838010.0529945	56797391.8885633	7492555.11341723	86214464.4728093			47901089.3637518		42368426.9295141	48562486.9616933	48293480.0334014	71647322.4385455	38471539.1885424			33265045.8617117	24611589.4411107	39813377.2246902	48779713.9037672	37956913.12451	39890739.1516773
BGI1537	D-Glutamic acid	Carboxylic acids and derivatives	6893-26-1	7594616.04860516	5863908.37931412	8576721.59563774	6407434.66120322	6724959.24464078	7388561.94987337			5251680.09738635		2070495.43422543	9911612.78415551	7525262.91048132	5295951.21932455	4739687.60966408			11921536.7165156	7434881.4088929	7887315.671425	9620440.64812796	11277824.2993581	2866250.43957118
BGI1548	Hesperetin 5-O-glucoside	Flavonoids	69651-80-5	808596.678525403	473355.802462685	1029550.8151673	948036.980301841	132648.273770452	1118761.3685433			756021.763711769		431978.994605563	1133030.77304078	663528.312196903	804670.85633912	401419.772465576			97299.6426683377	192601.600952151	405910.998249001	597642.409026212	208868.607738831	381340.80853483
BGI1549	Salicylic acid 水杨酸	Benzene and substituted derivatives	69-72-7	575757.828936324	2802798.78684581	2703998.13206999	5287584.94574495	1818925.8593852	3094476.2471744			2173441.11793955		2525647.90372376	2620194.57480519	3814682.98989874	1838867.22043515	2194087.04883231			2368041.7107461	4365083.51797088	3263193.19823874	2571973.52128964	2132588.07610618	2194952.00069268
BGI1564	Cytosine 胞嘧啶	Diazines	71-30-7	1857487.59509069	1284241.53732948	1296479.45841419	1380158.51737207	1557290.99392148	1697855.44791508			1321312.75797661		1140817.8610596	1354624.96805759	1372316.29199171	1100532.63769796	1100208.29498462			1659453.37153388	1457102.75239053	1450219.82056631	928077.364432911	1269226.77392254	1273446.01861842
BGI1566	Spermine	Organonitrogen compounds	71-44-3	5370369.94995023	2813328.54478992	1069876.58868878	1201457.37281811	882410.352192275	1430426.18885356			1211774.38924013		1055169.85962236	1547876.71042105	1155341.16112761	1685515.28034373	799266.141101825			1242755.2173476	965828.84277668	1163835.33888928	4033920.9768385	4098455.21291956	1526381.30741423
BGI1591	L-Tryptophan L-色氨酸	Indoles and derivatives	73-22-3	107661.124877204	301517.988647661	327730.523728916	165401.563521221	1389672.93024462	224741.970969807			779007.817763981		1404000.98127607	574520.983166359	978739.856035822	510876.162739581	1192505.5544184			1831842.57569717	1747471.80962927	2229071.64686156	1236291.17902408	1503112.03826987	1155763.16239434
BGI1592	Adenine 腺嘌呤	Imidazopyrimidines	73-24-5	26711325.9813359	53325513.9849203	40000632.3732155	46769048.403899	52231725.0302959	41593716.81379			23553567.1816427		30038795.4423652	27713380.7905022	30663185.9747138	18970030.5247416	29006266.0911206			49052581.2368275	39910713.4979522	41646626.4042831	54669967.5694825	50075052.317287	34279803.4582669
BGI1594	L-Isoleucine	Carboxylic acids and derivatives	73-32-5	3415613.70636584	2470788.25499361	1916534.67845521	2712293.34849508	3072584.61148284	2098555.95441544			6290098.95490668		6970564.39495874	3201924.19567106	4341640.17308058	7153305.1442929	5223375.17416495			2921678.23183633	3896050.58892407	4282508.24383061	4013097.66717086	2310331.04903792	6163278.27329452
BGI1600	p-Hydroxy-cinnamic acid 对羟基肉桂酸	Cinnamic acids and derivatives	7400-08-0	63863161.7711123	77412778.5499999	35438179.3472833	136574660.341616	80991938.0176439	33415036.5707729			6173600.29504754		12070359.467894	35750954.2139595	155046648.186523	9194539.40483383	5127128.36313034			389712.463554457	17811843.780855	54696602.1634686	56853662.1724587	71416114.3172847	731013.617276967
BGI1605	8-Geranyloxypsoralen 8-香叶草氧基补骨脂素	Prenol lipids	7437-55-0	7953907.6079628	111624448.27524	3650246.97333407	45692014.4134729	163834053.445526	2960174.24329678			12635780.2776985		5563223.33525435	235502002.406902	57156247.612867	77295900.5217229	2054991.02245384			183500893.299848	79064323.0703183	19017883.5573955	3435993.23528067	160567.288493122	2237027.7027206
BGI1621	L-Arabitol	Organooxygen compounds	7643-75-6	235202.001650337	215861.467750842	294008.918488205	124247.244763971	277013.01304774	160122.23881948			241003.203906325		184075.433382829	143985.516647243	139910.091441773	116364.693671318	147961.145447879			228463.757615212	265179.468640383	261586.389599136	148463.387728702	166510.60579602	140226.024790319
BGI1630	Gibberellic acid	Prenol lipids	77-06-5	18560.4697753419	95691.5346463827	264461.370571253	346830.461070895	18245.7391418595	188367.531440984			3445.65898316903		7626.78133873454	30105.6042984795	46773.7316412468	12430.201263171	5264.35903851465			12934.7518183798	16951.1219719394	27364.4333958885	76252.3850507663	38680.8884658699	2548.47260010791
BGI1631	3-Indolecarboxylic acid	Indoles and derivatives	771-50-6	555849.187650892	35106.8192617971	648994.908417657	88278.2749606063	244482.81595919	676660.950250302			43516.0639728162		321128.012757117	47494.6723954524	152238.63821253	79796.8255092829	116628.890962559			313484.371895693	401214.94432644	234942.757909558	202966.872216604	486855.966829733	256353.811092881
BGI1640	Tomatidin 番茄碱	Steroids and steroid derivatives	77-59-8	887686.197185195	892489.92903716	875632.285453213	912359.589679955	570718.741237999	960978.647450039			794281.873250729		631701.521108703	694286.869420945	501565.39029118	315113.797992419	359426.2933019			635839.953224765	707745.108934891	801958.77215311	931760.838403719	947786.934162203	851956.281628458
BGI1645	α-Pinene	Prenol lipids	7785-26-4	1484571.79964393	1550768.52833315	3083890.43670139	1277555.96882667	1269107.97804384	2996299.19129477			1345786.23313905		2146906.67556461	1918637.85547651	1393915.17670395	1467846.25587767	1079223.52374096			1222834.82524938	1228193.77192302	1507547.343572	1911389.93719786	1743639.55999127	1635944.24803539
BGI1646	(1R)-(+)-ALPHA-PINENE	Prenol lipids	7785-70-8	2476488.9881928	1764671.03785701	929656.133899493	1767336.39644494	64882.3161299326	1814252.5138746			46949.7276244511		97660.0924032788	344707.548894431	100056.753669923	580467.407694721	50692.751261098			185581.388143283	90918.2636303754	90294.1026644521	314688.974097746	1536586.70735077	165189.378855784
BGI1649	Triethyl citrate	Carboxylic acids and derivatives	77-93-0	9337.05068702474	20790.6953432116	14507.6695090603	17781.5695937557	22074.7992977141	10585.5692365568			52520.5595110775		118847.090163151	40364.0502554665	40919.8368270655	65057.9150031064	61916.4878341183			42193.6170093508	22590.098637269	43972.4946289779	22116.7508649423	55270.245015221	69769.2687530671
BGI1665	Sertraline	Tetralins	79617-96-2	5935.80656299717	15771.7585719136	7831.83219952105	18384.9599815499	14935.6274582256	11388.2191328776			30718.0448368971		51870.7187805049	23889.5645639252	23864.0557825082	22418.6418055239	33050.5658960726			20985.0926609568	21030.7645761526	24795.3991699075	23749.2108541645	25506.1938620766	31601.3891826223
BGI1681	Hydroxymalonic acid	Carboxylic acids and derivatives	80-69-3	2914221.01792609	3328237.14000871	2999728.43445292	1694423.7492887	595008.434015088	1711846.93296391			1281181.37671833		1402314.80641733	1325747.208642	1393630.77695589	1538789.30384738	1503649.86172205			1185731.56494512	862518.687230728	889310.424016456	1200098.68605962	755983.260038457	1011020.77377059
BGI1699	Deoxycholic acid 去氧胆酸	Steroids and steroid derivatives	83-44-3	19300.0381465914	12392.9131045127	11790.8824369675	12276.0785997985	17287.3276776995	16091.4909054568			12170.2634523014		9239.44937215996	12607.3144181808	9275.80716741036	5057.02056870402	9769.58348362218			15216.6693565979	9605.2458756013	12312.8729831525	13624.3798369671	15342.2464356832	11698.7967761004
BGI1726	Benztropine	Benzene and substituted derivatives	86-13-5	75455.2334604487	60647.6308312913	149814.814214868	41366.1599584873	117581.953839841	117171.202538033			57089.7812146068		189066.726106627	170878.08013294	148865.948892619	151113.482028697	106025.798212527			94946.8098554113	135254.458972238	114260.983808301	93088.9927958799	172939.737635735	145547.472417069
BGI1750	Phthalic acid	Benzene and substituted derivatives	88-99-3	1738906.28098175	691776.784977238	1058807.70535647	799013.835945955	619087.184556045	1800878.34215634			496653.707226743		318857.368994657	357191.23865676	653649.067102525	416892.85646	441794.961330468			92627.9775166601	322394.341660698	350220.763303476	829476.582245893	379058.188370171	279703.708158858
BGI1752	5-Aminosalicylic acid	Benzene and substituted derivatives	89-57-6	130961.380490163	130392.263297625	226882.909819306	271099.611866728	263545.574124324	841956.930586208			383399.784547577		347186.182331127	230736.418353	316635.365654514	329421.621710482	244019.027715443			376999.200539276	732243.659703509	392127.797501293	135806.3547672	161479.35409864	302385.032064497
BGI1762	2-Phenylbutyric acid	Benzene and substituted derivatives	90-27-7	239554.669668629	209243.906674612	183910.691050268	296841.888174401	210599.072855466	112832.901233408			447106.99032516		414091.736162555	309568.140647946	323362.513541256	269361.12021402	269991.176456774			161542.081459271	192471.131570234	272748.493232984	205712.825012116	256815.338213416	169558.541464488
BGI1773	Scopoletin 东莨菪内酯	Coumarins and derivatives	92-61-5	702328.022222193	150326.450627729	1176668.75037363	296396.783627981	777909.874126408	1610494.91914626			254868.807548779		1428239.4087112	344778.363017686	414011.287083934	2229009.27897204	649702.948099842			1293003.060968	749853.427106918	441671.02113322	258211.02825869	787671.025075894	498765.445850741
BGI1776	Methyl eugenol 甲基丁香酚	Benzene and substituted derivatives	93-15-2	3592493.80848968	2576905.16513844	2385591.21810241	2006092.1413115	390882.077818291	2073787.86090073			1269489.92691643		1107804.33224638	1521431.83622305	1108958.47913995	1575021.88228533	1029896.87279548			1006146.88900423	678348.107716927	947145.111360956	1142849.2487762	700922.41784083	821942.034142579
BGI1785	D-(-)-Synephrine	Phenols	94-07-5	1597631.3884394	3156726.77249586	5731333.74184611	3010637.16698388	4266913.56681827	4224540.29489715			1446527.02580623		2431310.85767952	2512919.5797492	2812809.21974129	1411698.53224072	3861634.753176			3416487.13250857	2401591.30322982	3162332.12460705	2862151.73498892	3856496.30660501	2312904.58876989
BGI1806	Epigallocatechin (-)-表没食子儿茶素	Flavonoids	970-74-1	86577.6484186929	64033.6257812724	61627.401517126	41286.4219782462	17785.6404963856	56114.2094479295			16882.4295232787		13707.2300717666	33068.9953208032	27502.9140973964	26450.6337891591	16515.4518130991			33019.3176347524	22076.3192091689	20745.2655473964	24086.2412660684	21090.1211088272	14336.0835229691
BGI1822	(-)-Epigallocatechin gallate 表没食子儿茶素没食子酸酯	Flavonoids	989-51-5	372655.790941235	449334.970889741	173804.030789405	541319.725712589	170442.09107724	167504.336800207			24833.3351084619		40811.5272694602	194812.053553822	304223.86895724	58402.1478770053	24835.1566138177			2898.78328396885	61365.5989429516	178565.831425642	272276.828458151	309878.012191607	17146.0644440948
BGI1823	2-Picolinic acid	Pyridines and derivatives	98-98-6	3631658.1908578	2718024.51209939	2523827.50255815	1992223.6833451	2285697.46378544	2473575.9412312			2538268.13082851		4695550.56209074	1727413.31742116	1790028.421951	3209659.34192532	1618627.97689647			1848509.60813787	3215426.91522875	1850942.48274747	2231105.535964	2763402.43061671	1358127.84049519
BGI1828	N-Acetyl-L-aspartic acid	Carboxylic acids and derivatives	997-55-7	160158.923480116	41698.6422007384	500621.438003616	89037.5709515585	760496.439677108	511104.073056443			106445.572422605		165701.416328287	189317.357684969	570230.610231613	151891.567070946	212691.047636618			564616.731364596	1353015.17928612	433064.487185384	598063.945588593	963635.470076867	479825.829054005
BGI0173	Huperzine B 石杉碱乙	#N/A	103548-82-9	455577.968608283	435749.524090852	250220.469113727	394656.587548016	309109.861412065	288289.602370519			335920.263113704		442167.757733919	299295.291818433	283761.671699572	230586.72634394	357419.032012125			325013.446967456	251529.67192536	345995.590661375	318919.252571644	269327.389234424	365325.479755514
BGI0199	trans,trans-Farnesol	#N/A	106-28-5	1364981.28286173	1625476.33160665	3139236.18056721	1181564.53192663	1121172.50642161	3122422.14995891			1380592.68680715		1944569.27821461	1931629.24649539	1254864.66526993	1487221.74428266	1161197.23660945			1060606.90565389	1263943.28235708	1395303.34785098	1905241.86620313	1721200.88473714	1485866.43178031
BGI0310	Topotecan 拓扑替康	Benzopyrans	123948-87-8	1561868.25019531	375356.414839415	2812603.25474187	663252.188811353	1061352.80395882	2242734.97158207			523544.241693303		1422767.63234876	809933.534132957	973617.014420172	1050249.82320299	950648.52150783			1397373.83082267	1905499.9241623	1147317.93889198	1093855.56529943	1580431.93463809	927619.355842955
BGI0332	Aurantio-obtusin β-D-glucoside 橙黄决明素-6-O-葡萄糖苷	#N/A	129025-96-3	330119.053838588	134284.441614284	205579.954619422	107571.295821618	61514.8831864804	301682.307745362			62872.5306250022		35910.7734402569	88225.9959003442	66081.0106912585	107141.565229343	26250.8400447661			32680.2843351193	77970.3022111808	64579.5242326982	77275.4065665456	70314.6741103267	37456.5440431477
BGI0364	Linderane 乌药醚内酯	#N/A	13476-25-0	58854970.3935106	59004262.2045795	84075447.2969843	27394033.0968176	41485899.5230473	77312749.2194575			28894688.4693911		42681157.2356913	62750012.5391171	52835766.9633494	66275223.1974392	33471085.4265178			40167996.9883499	50796481.2653024	48185265.5321319	50840240.2953276	54470222.0159446	45095896.166189
BGI0403	Aloin 芦荟苷	#N/A	1415-73-2	118479.238266028	107216.50056566	92077.448314891	77291.0953548535	18238.0963072171	106561.396981339			48263.2164274346		45835.0912824208	61608.2872320278	51154.5816065155	36877.6120023826	52953.9122966406			46324.1889005826	30873.5547057266	57005.2716824437	56804.0401608984	42865.2221009825	20967.5398144406
BGI0405	Sweroside 獐芽菜苷	#N/A	14215-86-2	325196.301867459	134744.868292448	169120.327038836	112775.686681232	134163.847880045	144351.522739374			97192.1737550116		30866.5916592203	132165.55926051	108676.253726431	99498.0239319608	13763.5889119984			15402.2148013827	58456.5816206267	68112.6195204206	96328.0638341782	66305.3081628033	31053.7019442642
BGI0437	3-Methyl-2-oxindole	#N/A	1504-06-9	1394837.50393233	3423995.87979135	75442.270414739	2380790.43141709	170483.362384309	641023.579986839			1258055.37713155		41640.7201159963	246596.381483411	163075.909381294	672705.0785854	264643.893932267			293610.609019207	763351.159507845	1057381.09535469	529008.501988484	88584.8372755616	396354.511103455
BGI0496	Swertiamarin 獐牙菜苦甙	#N/A	17388-39-5	43859.8711418347	68476.3142566065	143940.608264168	38469.4100494316	74762.9727556587	135311.37532806			11503.5229411979		45688.9740564906	31301.0427181775	34613.8193364852	11260.412670242	25996.9402989981			72750.3288716967	78189.8506883374	81829.3952042839	104052.920177818	60589.0765820957	51503.9815891443
BGI0521	Isoguanosine 巴豆苷	#N/A	1818-71-9	337127.619731757	392489.434894598	428481.251729262	254382.008755592	56247.4415509216	356556.187868604			230424.321104214		239581.154317608	255269.311223108	142437.785356398	231425.482860071	197965.717263377			160487.095317719	383940.798160651	147741.011257861	282557.74730623	196601.32534461	122261.71890153
BGI0527	quercetin-3-O-sophoroside	#N/A	18609-17-1	99930.3242464864	11341.9391652238	40900.4529558787	1570.95722265962	2121.65089673698	27498.2436949102			1400.45495660569		5856.34255829252	1235.04631914585	309.011264716206	2034.09099280012	1873.89980714909			4012.05595267806	8774.7407755376	3099.53710073817	3090.93672746137	2569.60524166947	3977.72248038785
BGI0557	10-Hydroxycamptothecin 羟基喜树碱	#N/A	19685-09-7	112040.756325697	147592.488489062	126429.475567933	137421.863290367	55905.8068424052	120207.870884682			101935.327765785		60366.1356525297	83022.9582001525	63639.9128537659	89068.9168950924	115283.307798119			100385.91428133	84931.9684724948	88733.1136641093	87194.4402525803	57226.5326711388	78876.8305621006
BGI0563	kaempferol 3-O-sophoroside	#N/A	19895-95-5	2908984.33458904	1358327.33561851	1495025.23058022	2050205.09617143	1727085.73690451	1237118.72510218			689015.84176231		1832801.25389913	679017.424064119	1375235.94709757	269024.76607811	1666406.43780968			838763.526081658	2757446.09251356	1504707.22327466	2055973.99552464	918071.278326902	1246501.61566827
BGI0600	Gentiopicrin 龙胆苦苷	#N/A	20831-76-9	256632.150782871	125426.23269742	85517.0777739263	244653.975166183	365851.030080887	36002.3407314167			227490.462933167		391535.897887374	211393.360549934	268212.662397126	1565712.53648573	1142458.23853796			112840.773692779	173261.539607872	187318.680041136	151280.922204619	208200.380080911	509650.112948201
BGI0668	Catalpol 梓醇	#N/A	2415-24-9	172309.800704629	64431.1370127313	81516.8842051487	78097.9961101287	311547.925662998	158685.167601912			112220.324945311		70911.6758110715	104297.201161144	87090.1305413444	69502.8987738721	126241.176287187			236165.350736963	161150.381810627	158514.43850462	90945.519143771	92702.1620090443	132813.332948637
BGI0700	Byakangelicol 白当归脑	#N/A	26091-79-2	1904303.81375822	2017734.12326565	388102.390038323	1154120.38529441	555816.7422522	633806.859249404			1303642.63501592		869177.870233158	1336549.36303686	608810.529900784	1154968.78712432	549378.353269558			853890.822763281	823859.259685509	964792.635079611	892598.699892484	465888.695373894	966464.032105846
BGI0859	Jatrorrhizine 药根碱	#N/A	3621-38-3	181479.292932543	160231.343794333	183759.389767308	229252.643788578	520123.17590515	375059.905460695			288571.690715744		239686.036007386	166289.564993878	178056.119187625	182402.931962948	290518.586205526			254205.030892225	730714.018674139	266156.254464429	171834.806380732	182240.014774454	228826.359716304
BGI0862	Vitexin 牡荆素	#N/A	3681-93-4	5554210.46898473	1277902.80607388	8475762.49657226	1837724.80097296	3991825.78381696	9000391.29229308			1733554.31758696		4372341.94760734	2594851.52035547	3802944.20799014	3955964.2403894	4324427.3089696			5964140.7195749	6581886.98654211	3639611.46814084	3532499.25912586	7862689.56877207	3936539.8539468
BGI0922	Homoorientin 异荭草素	#N/A	4261-42-1	605592.864454621	333042.91713678	216109.993031725	113851.554354932	96582.5013763158	195755.332085272			74338.0683496755		231323.289990807	104844.51031715	105127.637639292	69956.3382102577	102298.515749402			105996.963962364	357343.939815274	135008.044627693	228575.218381271	127170.796464122	134731.882989312
BGI0947	Ferulaldehyde 松柏醛	Phenols	458-36-6	149238.734248386	231014.081131311	280653.262256417	107270.195687275	148793.761952573	188952.054456067			126807.647701733		142664.197989765	130664.059799624	106118.479069223	61173.8762627989	123426.907051268			107787.33178822	172660.480662214	97625.9934952744	108123.134060811	191912.563588894	73620.3488389997
BGI0955	Asiatic acid 积雪草酸	#N/A	464-92-6	21441.7048883347	36113.4664090888	39102.0912154362	21221.0138160938	68781.6903644974	35836.9634881251			15906.8092251723		67900.5852472716	65654.2941725921	72291.3167281656	102529.468802445	36413.6689258739			59262.8264874395	94589.4021008629	48262.2970629274	37726.5281431254	59323.3528846416	64373.8093373497
BGI0956	Gamabufotalin 和蟾蜍他灵	#N/A	465-11-2	59498.6606588811	20696.322173153	236738.728479473	24076.1095563668	114031.857148435	124941.08164096			30196.2479151639		189708.566191081	47732.3197921394	81193.3934574236	81355.1244174249	70060.941968566			86522.4637969066	191245.619169057	67539.0301177644	68720.4015682165	173234.762938744	181846.143139484
BGI0958	Bufalin 蟾毒灵	#N/A	465-21-4	633318.974539276	438058.806964255	463396.013578575	506453.99632241	190357.025305005	581343.780146906			177758.818003766		219550.544419392	269118.873396698	213435.630153495	175637.530419129	144492.892018315			295095.944019605	302555.797298613	295498.179963684	292745.212293781	2121733.56472132	232971.842251684
BGI0986	Lycorine 石蒜碱	#N/A	476-28-8	504254.66395974	550297.104094245	524438.11802741	636210.302437662	560280.92196684	558022.737511			350605.54774432		366557.920075609	595268.321040757	507618.000313939	281185.671150188	580160.064198398			697754.816697873	564708.376278525	734977.17399004	552785.550162806	514397.556078819	344459.089385995
BGI1007	Taxifolin 二氢槲皮素	#N/A	480-18-2	141271.040623752	49920.5471679644	276958.325662032	290430.716539198	2634397.97292873	325489.502449909			424221.896980028		907942.859914897	155176.54860032	436814.313037151	707024.908978312	961761.123511995			1223490.54867991	2539220.30495294	1070060.20382498	396495.898709892	4196211.89360572	1262368.92086965
BGI1017	Orsellinic acid 苔色酸	#N/A	480-64-8	1304660.2375817	873672.490886083	752108.059958953	1448571.32418068	701064.993214153	699239.220957285			245283.538042075		545552.418264744	392012.583468285	1432903.46524213	187399.281057769	164891.214690936			117178.26275542	406858.419935973	866740.264485335	886339.279617123	909937.142212382	82662.1223911735
BGI1034	Osthole 蛇床子素	#N/A	484-12-8	49680.1201468241	71168.8093963086	91932.7830531137	74109.9069789678	114076.949872825	75021.3904870159			318885.892724326		1196131.7471088	192013.095326175	280758.155129543	250157.00211245	492147.469834611			172676.751030601	136165.945067974	163225.232221584	34162.3569729906	170552.545515169	260342.224165008
BGI1049	4-Quinolinecarboxylic acid	#N/A	486-74-8	19513.8196289057	69171.2439634016	2761.91201613342	20468.8585397901	3190.88346321214	6702.05535098365			370107.957596838		128738.240291453	9592.31310263718	3292.47400635674	7641.41247373736	41543.8116004641			6611.63506390482	10111.8269929749	21847.5625528139	9255.90895228864	2408.59774191981	8543.42750646048
BGI1072	Baicalein 黄芩素	Flavonoids	491-67-8	65715.6572796971	72222.6431286295	89749.5320840894	127408.20111502	570768.419663175	116054.906145814			224971.443311006		709220.743375794	78013.1590396911	160729.611459821	189105.533209239	762901.200409988			159386.451396561	147869.498520334	222377.649210997	150135.615318149	229751.187388444	554250.439333116
BGI1088	Apocynin	#N/A	498-02-2	137076.301268072	370919.445950145	215004.43190273	347670.685161196	196203.79380646	294342.97974135			95815.7094614741		276536.262532151	144327.584869747	176082.64016665	188595.679946261	67834.8310662776			44015.0709830243	53514.0415180807	311116.148691093	365860.927876828	261384.042353711	119668.839228042
BGI1154	Evodiamine 吴茱萸碱	#N/A	518-17-2	5554006.31729892	16318902.75419	5316492.16805525	3976020.13328592	3704335.20875792	6827763.44087367			3053069.77505538		3433304.80415969	4606697.56538711	4668783.74481076	3773299.46311811	3002904.77868655			3961902.33894323	5926830.81275828	4894514.67192476	5033015.3217526	4045893.24434521	3230034.82940975
BGI1159	Matrine 苦参碱	#N/A	519-02-8	92006.9276857562	268488.809023669	113027.367187868	276202.842602156	120149.946279695	124574.685507116			93452.6291492572		56139.4931969428	187471.389522824	112808.25391215	75383.7740931922	81983.1165627728			226905.564455867	138052.802267143	167202.657328265	182479.598770867	93509.0608661712	68882.7719918808
BGI1212	Scutellarein 高黄芩素	Flavonoids	529-53-3	544237.579030415	367500.563380295	319929.217226834	265685.760044093	169429.415487119	328838.391626566			200457.98371012		219881.325133307	270859.220493648	193792.905246801	156508.985556957	158429.166952688			235283.281292646	225619.352465517	228208.692653335	271082.806261406	273793.718663896	146294.991485639
BGI1295	Maleamic Acid	#N/A	557-24-4	24630481.0342906	36446720.95091	24229366.2179043	31791701.7190227	320382492.225547	18802396.0218046			542834750.015826		842635832.120843	106745737.500221	343197864.585	377865345.458529	700428841.399135			130208930.882891	202536464.674227	256081877.40848	170484354.351743	171639429.899606	518921559.883898
BGI1310	5-Hydroxytryptophan 5-羟基色氨酸	#N/A	56-69-9	1208206.26987194	637962.629596099	842684.440282375	515678.609529103	135186.459155201	896283.355007519			458636.503151349		538510.10582973	644888.617373242	440454.994427347	661700.124752558	486648.873320203			292991.800389217	347242.910288389	408480.032474982	570026.793240205	547533.457934813	369379.681084501
BGI1397	3-n-Butylphathlide 正丁基苯酞	Benzofurans	6066-49-5	1072747.77441598	1348175.07035463	1867340.52622551	720377.905998976	1060077.97914046	1562690.91617374			674046.66761872		1263780.43701567	1405834.3813255	1221008.33372394	1363848.96317199	712423.024354909			1010035.57180776	1317037.1224865	1208886.79198773	1216609.19948289	1397490.1877549	1090565.35513982
BGI1415	Schisandrin C 五味子丙素	#N/A	61301-33-5	497773.810914806	413044.197312663	397936.973430706	527288.221428379	6018.73228090913	335243.908472337			76400.2657625788		204407.241979895	352510.305085653	223979.386197662	327749.430737333	146041.936931889			82955.3283348645	56807.2686754297	154676.146977613	115957.351305068	261370.082165872	98560.6770145636
BGI1452	Lithosprmoside 紫草氰苷	#N/A	63492-69-3	1961940.07177387	678861.959644371	2294616.67650804	1280915.67506877	4385413.42509867	3128921.76075345			2462341.68066152		1493715.16514779	1380775.78360818	2523738.75274465	1180204.92702401	2617622.60049996			2907051.22784615	5455951.51701013	2067815.82801936	1584179.13997937	1585569.28376305	2567103.0120974
BGI1485	Metformin	Organonitrogen compounds	657-24-9	9232767.69475997	6420291.12298063	6307668.19992871	5529797.98662047	7910994.19582225	8127749.75474682			9631818.39033278		5659965.48876589	6015593.75736387	5882917.26154801	9004941.04895077	5941627.63409694			6717928.31771357	8405701.38036953	8693674.6552398	4228976.0849904	4006906.16242606	6745519.97121507
BGI1541	Germacrone 吉马酮	#N/A	6902-91-6	3003302.41343495	2854463.80776334	1692161.5118471	3224293.29986113	4388705.19397916	1398404.30728827			3599395.15055385		4123025.62105905	3328328.60592097	4115029.17767574	3276467.14996461	5336343.4634057			6036216.86761581	5476313.73847757	4429912.64158926	4364156.10005407	4952445.5063461	5286222.94932082
BGI1624	Danshensu 丹参素	#N/A	76822-21-4	7185.7541487808	50343.796536712	48393.8480750951	119479.627617021	84675.729286883	24260.5564577087			220106.336762969		129653.489909089	135975.119043764	94096.2089502198	173580.022366234	184433.801183376			158817.186314655	75916.0842876213	93857.717576103	45625.3677377476	53746.7231823296	77782.2784385951
BGI1687	Purpurin 羟基茜草素	#N/A	81-54-9	1524471.8984647	1955120.38472481	598898.257307147	1872585.76988671	2532764.32213724	577843.770385862			2344721.45730395		4437642.90122763	2226213.59875829	2788577.81428421	2511842.65962346	3821613.48516884			3724214.73840534	3402760.25251798	3336837.0507782	2948783.46369832	3548546.66169364	3607762.21793656
BGI1707	Sudan I 苏丹红I	#N/A	842-07-9	2910186.13319232	3626090.30388576	3200177.41749408	3100042.48473983	4007399.58796783	1791447.56229104			578473.863620811		1006338.02057132	1215489.61873364	1132812.50800826	1451947.13648496	2025468.55167825			3284823.69631238	2016957.66766174	3060211.6676703	4029411.33097302	2097506.12406535	1731892.3088994
BGI0158	Protosappanin B 原苏木素B	#N/A	102036-29-3	389627.34429397	260109.615439679	251272.942073263	143905.632191162	146876.939024253	166169.91352675			345672.467650924		810745.32265628	150031.122390234	141764.15903007	707040.875155649	305036.180423138			214359.389485204	375945.274521251	143980.814062671	149920.870276936	435662.096663666	248599.020315528
BGI0164	Ethyl caffeate 咖啡酸乙酯	#N/A	102-37-4	66736.4157087654	69254.1779613319	89906.1421839951	177682.402597452	86280.7245617921	17457.2788285035			213011.098160552		272228.941853658	35595.4992098237	179693.240814263	113673.860584034	259907.851536462			101998.508199356	148232.113423179	40914.248784143	40734.9471001206	61251.7201648804	118786.45423291
BGI0204	Epigoitrin 表告依春	#N/A	1072-93-1	375155.686112802	319373.106443444	73483.3169616814	158104.94326961	262355.584770499	164722.862647948			434524.887156855		597003.610286136	267398.93036916	330052.288384183	499979.778912635	406385.777930781			207365.977668418	229906.846291957	262133.049921855	249291.1555283	255166.174689968	462285.035068751
BGI0255	Epimagnolin B 表木兰脂素B	#N/A	1134188-26-3	55454.1461286105	58823.0828768252	140420.862628999	28689.0112192674	171278.981470585	110581.774792395			49308.8094928233		245596.164047616	187183.332072295	191412.880432128	208798.216337337	123722.695980681			112254.022652727	189676.387430691	135808.735937817	128169.98133406	190481.178995744	256378.481689203
BGI0256	Ferulic acid 阿魏酸	#N/A	1135-24-6	4705201.38646473	1752193.76085805	8035532.8329416	4435729.82140045	5170158.2862458	7112707.00539931			1032097.31780187		1107001.13571611	1568889.30119781	4669995.17835296	589249.86964218	724640.13299723			723481.518343096	2225081.52590663	2319277.78119822	5194777.98918643	1299616.2414909	613708.221176614
BGI0257	Baohuoside I 宝藿苷I	#N/A	113558-15-9	432474.160843937	394878.7919729	1065926.82888099	229232.411763741	934173.742658486	829704.757923721			523006.450996191		1723164.92751777	1274877.46311784	1244367.39764612	1352574.71314806	932322.431103699			626460.679562996	917020.696896013	767452.746757953	609267.472761884	1138955.88507884	1082571.25957814
BGI0288	Scutellarin methyl ester 灯盏花乙素甲酯	#N/A	119262-68-9	2478.70961926585	13007.7686064096	42426.7378278409	16487.9101232776	37673.0605194378	19490.2783882786			219742.478373102		32210.3322829583	143908.701327102	122031.191895626	57168.4945747262	31661.3837853895			23683.7588683514	11613.5745682797	187036.822337796	30231.3296907834	32756.184746758	71853.9341423131
BGI0296	alpha-Methylcinnamic acid	#N/A	1199-77-5	1022902.02176934	942228.879347588	1678767.36669246	584280.645275897	822350.664721712	1381480.22750279			471056.669343944		773855.653444761	1199761.68193473	988393.039792	1238125.96075724	708512.797293823			803693.494133079	987322.998605848	987352.022978757	1038020.86039401	1152954.23076517	769878.030016915
BGI0349	(2R,3S)-3-Phenylisoserine hydrochloride	#N/A	132201-32-2	733686.491546891	668050.512086598	866766.561153467	854337.712803951	606721.078104603	673470.309987485			444184.127874686		330239.273397326	556960.280838446	436387.713415065	574988.880044307	211041.126729776			607878.934705168	943816.408575208	488099.447852443	795930.623076385	907690.482649401	132342.94691209
BGI0357	Oxypeucedan hydrate 水合氧化前胡素	#N/A	133164-11-1	84873.1744380789	254105.47996883	31648.5122233145	80502.0367084412	26694.8928390596	52230.6955623563			1364148.08688487		581628.133849609	68411.2440220362	41732.0168768063	38643.4712159123	157174.201205929			33246.6350906668	34882.1139915162	84813.1372612933	31024.6933152652	50831.8359614282	53647.8564095642
BGI0359	DL-Tartaric acid	#N/A	133-37-9	283300.909211756	151777.795591509	165786.389996775	153244.49683223	25861.0595795711	125779.373184542			98278.7508698084		81849.8499877568	103565.055141048	62494.11002265	75276.2684991196	65249.6700184588			56727.3625560861	30214.009485416	47484.9442887487	116266.544396815	60574.1857150668	56804.0480324148
BGI0373	Lobetyolin 党参炔苷	#N/A	136085-37-5	3355.02110082449	271.680338047469	2042.56731995643	5703.05076589767	105422.968207208	4666.20445942767			101076.661950136		350071.773437073	12076.8086134554	83210.6262857923	81542.4608981852	244501.180768013			19984.5072780855	77407.0343968364	76878.9326758822	42136.7550080397	44262.1715641284	223560.009754674
BGI0380	Diacerein 双醋瑞因	#N/A	13739-02-1	2413.22700306147	14035.8642014419	6531.17204776192	39852.3284530153	20814.4958651783	6245.84226604113			33435.987040331		13261.7069963844	17907.5715079263	12784.3155977722	17818.253908673	21673.8055705524			22022.5928443612	20328.0294914833	14902.5528370852	18390.5267238921	38657.6214861372	23048.0934376329
BGI0383	Taxifolin 7-rhamnoside 二氢田基黄苷	#N/A	137592-12-2	5973572.69891339	1266083.2814723	6278140.56007531	5216119.48342413	3806562.70780113	5850024.66521555			739927.027625896		1071153.11200478	1097087.20441156	3591098.29950528	404805.395803675	902298.145005668			217646.74961689	1758296.26938416	1598237.30371153	3403833.17697899	1209886.66881249	664967.963862167
BGI0413	Abscisic acid 脱落酸	#N/A	14375-45-2	608137.056690091	436654.648585504	441763.911728043	438761.211574185	222533.359149611	450591.68433649			370700.726896814		374456.318098128	374099.010763473	366722.53666816	335030.007603242	271314.532707443			489290.137992535	228778.511085586	360673.734498986	189965.849513158	410570.985720019	378826.052416363
BGI0424	Lactose 乳糖	#N/A	14641-93-1	2849262.26265135	1293650.25640502	2432129.63465489	2083198.76820461	5763340.84706481	4366687.7381699			2725685.18993914		1799500.86918224	2454993.62692644	2720672.81674724	1750596.61240693	2349573.71435425			4776653.75872022	5899438.54107763	3063590.36956639	1689493.68727432	1999519.56561944	3091705.15112342
BGI0510	D-Histidine methyl ester	#N/A	17720-12-6	6552217.54084061	2963441.94083676	1376503.23785329	2192548.10197369	262124.771164298	1895633.7998989			784801.562894949		1766221.10223342	1449046.59962308	1503641.52180783	1570057.46554518	1403205.58350992			829994.318070804	559641.665315948	1463747.19505462	4014434.85272841	3607797.42160152	1496611.29883194
BGI0517	Phytolaccagenin 商陆皂苷元	#N/A	1802-12-6	44235.4332053598	31911.0005484493	90584.3435488409	17604.2418466524	61847.3464934259	62251.7011062968			23527.8431931678		69269.4257625804	75916.3408477107	61002.8344206568	60660.8297643533	38067.0093579115			36847.7710268842	66238.8553047555	43264.2598266372	46933.7217851388	56680.2239870171	49518.8209383987
BGI0532	(+)-Corynoline 紫堇灵	#N/A	18797-79-0	253015.199217229	252937.254515226	206879.287566945	202633.249698254	125866.022308764	611539.383706538			70206.6762471406		67923.8922894445	265257.703320223	109317.976234869	100043.002785082	102109.586982349			304804.536559814	249401.671316854	294832.134053245	176662.593048005	189758.971944844	263105.330953121
BGI0533	Acetylcorynoline 乙酰紫堇灵	#N/A	18797-80-3	36435.2980398379	38703.008999636	25284.5679093502	28035.6358289339	39822.2256208875	11748.9126031602			8100.84722935939		10365.3587940512	28338.851935231	20597.1048304643	12961.3427625992	15717.8475612423			42252.8749786277	28567.3959067415	27347.3783119285	24192.6195966694	22477.7637800801	34834.8820072833
BGI0560	Bavachinin 甲基补骨脂黄酮A	#N/A	19879-30-2	1089719.32776871	14389624.8891995	808051.045731197	10655432.7142576	10961615.5933932	743313.681960403			1789068.71192675		763536.012310357	18435829.2642982	4492242.60120413	13153067.8133036	493036.546385449			11788253.8863065	4922548.59408092	1674022.91574197	190412.24082568	6005.67280858135	513603.987185477
BGI0561	Bavachin 补骨脂甲素	#N/A	19879-32-4	2477891.0865633	2115882.22012659	9269158.55312415	2815868.22435179	8742316.01984724	4583568.58741979			1648887.26917547		3368660.03341903	8603631.51877493	7443650.20970304	3978726.68721359	5555461.50864731			6862231.18732387	7937307.3013997	8150300.57790886	6795315.53151821	8270191.17452576	7513058.40634741
BGI0580	Rosmarinic acid 迷迭香酸	#N/A	20283-92-5	57187.5094987264	223941.812962981	120544.651983342	785276.29108144	248734.52487077	71897.7565210501			788123.270118932		278370.347466219	120236.380090451	402014.540019244	89521.2919196555	285426.913189385			38337.9632378789	60831.124371513	188426.36286254	242953.194242495	108217.514773938	48071.4792874823
BGI0598	4'-O-Methylbroussochalcone B 4'-O-甲基补骨脂查耳酮B	#N/A	20784-60-5	7837479.51635141	109550320.463278	3529184.71169849	45058018.9226954	162224068.928162	2899150.04052215			12502630.0984481		5570786.47043945	232946587.151764	55560870.7646329	75672672.4924083	2128751.03580267			181449502.862306	77481025.8327935	18617941.8385325	3360944.81432671	206785.747713168	2080727.13971979
BGI0620	Lycorine chloride 盐酸石蒜碱	#N/A	2188-68-3	499014.128704089	518210.226274323	478135.943829021	608610.250202284	499808.521425586	558022.737511			331024.16862587		339141.667082678	566984.680116877	481554.404172257	277383.592120213	484598.013084186			768782.778692064	539196.66327516	711663.77185266	524281.128511778	491514.016172202	343243.651340509
BGI0622	Butin	#N/A	21913-99-5	27941.8175262696	166917.539903333	153374.375977131	263584.009699232	241245.311204659	60891.6158468119			602196.630951408		28894.4573215127	125913.512344639	76014.0365072246	44751.0662534252	110641.30234519			75073.0469789251	26717.4300500449	236720.974821392	240654.62694951	169844.298652108	89259.8622010043
BGI0629	Dehydroglaucine 脱氢海罂粟碱	#N/A	22212-26-6	182207.305547992	159683.69342869	429767.312634419	175083.182465415	453372.186705145	272078.355530264			256498.173415494		595381.081581022	516740.259308244	507995.376902708	389706.714101493	374686.77936824			338391.176392233	404528.866627127	530406.827705323	347871.059725199	465546.20543223	554433.001745902
BGI0632	4-Methoxysalicylic acid 4-甲氧基水杨酸	#N/A	2237-36-7	8522853.31885457	426069.124677265	4422199.391037	427314.645992715	97817.5834545316	11376133.7631243			252597.69144499		122046.429913732	147065.330889156	204521.703434735	280021.204616371	129161.450804167			48164.1002745226	130186.84822082	156097.104762284	78240.7650619991	48274.3295492197	171656.364505106
BGI0662	Nardosinone 甘松新酮	#N/A	23720-80-1	373127.650969766	177851.958561485	214766.862344399	144814.883189732	249512.565437369	241690.287075421			212236.399665641		144071.58476713	196719.233924203	176284.08998819	189019.315851616	127866.305636361			263174.355979653	196643.45242505	171173.798982961	119422.103474641	115622.929083233	197704.402455548
BGI0666	Sibiricose A6 西伯利亚远志糖A6	#N/A	241125-75-7	317972.028532676	158800.017381778	112350.493027259	222399.93796428	167159.493598319	76077.8089118359			382192.254506478		309810.650932773	142904.10096838	140719.536878552	511259.350995682	174449.642493734			268504.658888211	339800.756786085	188046.66283543	128758.541817385	128459.787141309	223075.643713543
BGI0687	Aristolone 马兜铃酮	#N/A	25274-27-5	182151.452728288	596588.573904501	410927.648497459	423943.038559537	495786.861836743	285321.365986611			669641.382112823		1853680.77798726	656787.790558871	690883.557194346	789770.155235924	884921.827724595			1307087.0288135	615782.19046034	690146.539347072	637115.729009205	546368.247589804	1384320.61261073
BGI0694	7-Methoxy-4-methylcoumarin 7-甲氧基-4-甲基香豆素	#N/A	2555-28-4	195852.727189405	221799.827981954	59526.437210764	166306.054043359	300834.964344712	142723.412292485			289607.287671521		511829.817514643	237527.372749236	165142.36524298	289296.489237648	335966.640697983			682119.45578786	572904.552829424	368449.955148767	295975.335622029	629643.560090384	445575.640179563
BGI0703	N-(2-Acetamido)-2-Iminodiacetic acid	#N/A	26239-55-4	1948656.73048089	1665068.73623926	988591.96522502	899996.632385267	21057.5380068074	990834.942527746			397364.349675187		441083.980272879	612076.473279161	247202.631009387	640991.992745794	402201.988854053			180365.715404802	65022.3407919862	266683.166795194	552199.972249498	452280.304267885	154172.312891394
BGI0704	Oxypeucedanin hydrate 水合氧化前胡素	#N/A	2643-85-8	663238.752266778	69352.8408209386	844270.44934498	80194.9859785577	300142.523526109	749646.489845761			45587.2578843701		604348.017844699	93430.2338399131	207790.477462087	146657.854139707	231505.27526241			396950.678785305	499246.038743385	286946.40181172	200927.788515085	656572.762432907	329409.203276097
BGI0707	Alisol C 23-acetate 泽泻醇C-23-醋酸酯	#N/A	26575-93-9	529633.029657538	352174.932521386	1199293.60099305	378767.3073361	472554.937374166	775087.497660759			131667.756194964		171068.311000948	268255.901284486	238858.415324395	113835.651181054	178317.980371175			441306.725952201	388701.580917354	518057.151646256	889633.03110573	553596.832853131	298737.89557483
BGI0710	Dehydrodiisoeugenol 去氢二异丁香酚	#N/A	2680-81-1	802861.17172962	688712.516743366	659925.76250938	622863.116640596	395382.178855751	699765.291670859			543100.630537723		456425.392570846	602731.409488229	473325.042231673	468493.412791222	449325.610692319			508631.550587649	460045.838104842	420546.055558713	576825.06449861	482438.963397295	460591.809807821
BGI0731	5-Hydroxy-1-tetralone 5-羟基-四氢萘酮	#N/A	28315-93-7	7116111.46048814	4406895.30574464	3139520.20227382	3609327.77442035	871137.935378163	3571595.29673441			1913388.32794612		2510738.56813069	1954774.66264545	2126039.43197958	2456409.15631941	2322874.91650887			1215208.03317082	658316.108754069	1712605.10620358	2097186.15382746	2190252.95867548	1658902.70497305
BGI0737	Fraxinellone 梣酮	#N/A	28808-62-0	5066867.65363943	4361514.6800151	18309897.2939231	5872578.47236659	17475598.2091471	9704741.52546762			3149612.20168562		7120027.9742901	17435582.1737972	15719404.8591887	7930950.58445871	11215817.8075487			13084738.59583	16227103.2820297	16598066.9538888	13045767.2188384	19489096.0357674	14734556.4159434
BGI0742	Pectolinarin 大蓟苷	#N/A	28978-02-1	39495.6473677427	44595.612542234	34097.2040396365	94389.5365805739	48318.0006094064	23654.6484542695			238665.113868138		258098.599323983	51005.3725737824	48401.7378913446	54604.3264943204	221424.514985995			75178.934169928	59350.0719395468	62372.2373138696	32533.8737437909	70148.0825354412	36715.6038002638
BGI0753	Fisetinidin chloride	#N/A	2948-76-7	4841721.08549506	3326000.78185763	3102284.16021489	2472005.92033643	1376716.79695878	3074598.18766392			1219420.41348215		470614.002705953	2161221.83672192	1087505.44045235	1305725.69119248	702335.425028103			1482191.41370022	1362099.44742289	1514715.86465121	1759834.61855169	1181562.3783652	891471.998111318
BGI0757	Apigenin 7-O-glucuronide 芹菜素-7-O-葡萄糖醛酸苷	#N/A	29741-09-1	86336.9035061768	29693.2310520723	174041.600347736	50538.407924425	83495.6756180927	39120.2720338208			72912.6231190404		2974239.44085041	50206.0131485627	103137.750940544	388061.133423906	197304.894019341			114667.084877049	104101.06993702	44109.8329366561	50794.1615769473	193058.229670928	200126.2326612
BGI0760	Shanzhiside 山栀苷	#N/A	29836-27-9	10592614.3701276	944210.715918818	176889.780639242	269031.184856893	1130445.55769326	366237.884930619			496029.94998697		114462.676960547	457021.14885594	857328.509744936	399851.623181753	653667.887564056			1518625.35038428	388060.03147386	1382880.96327608	2756782.50724366	4057546.27847449	621523.866091563
BGI0766	Sparteine sulfate 硫酸司巴丁	#N/A	299-39-8	33685.0281592539	79485.0875335932	6417.03248342387	31390.5815945987	54028.7266542258	38761.0042294285			28864.7661148793		121922.723305276	12870.1668417891	56396.8346548427	25671.4843350881	43808.3921612022			48825.6523577608	36722.182170964	52992.8387718443	45614.4316476858	36636.1862869681	74497.7997148678
BGI0783	L-Alanyl-L-phenylalanine	#N/A	3061-90-3	378308.481487113	344506.397505867	391831.833942857	320509.786876698	359583.141390635	545596.633609878			410249.334964728		792643.818710222	234649.198722694	363242.285905073	225761.747552541	398548.226182632			270789.490752787	251111.270114385	372484.828959314	459934.168778268	323937.782704428	508120.53597621
BGI0795	Isobavachin 异补骨脂二氢黄酮	#N/A	31524-62-6	17082126.5280746	15609393.8225173	36211156.3666568	9683805.19299551	29844150.3676752	27569375.868848			14248470.6343589		52359531.9974491	40204440.0226068	38807570.7290383	39684197.7465394	25973210.5039038			22777193.5395537	31969799.8428785	27437491.9897574	22398679.289975	38755365.1373148	36570057.1502
BGI0806	Isorhapontigenin 异丹叶大黄素	#N/A	32507-66-7	78804.4766833728	3929.35562607603	15013.3343231625	14057.6869045875	19985.2483064753	27160.3608788746			28344.9684150685		31129.244096015	38856.5495976947	26800.1185661391	8145.94367760301	36915.4842483176			36180.3902909302	33483.8421329041	25325.0044086667	27686.2032764054	27672.8150147773	55781.0406382444
BGI0826	(-)-Gallocatechin 没食子儿茶素	#N/A	3371-27-5	664172.84252734	752917.730106563	625590.988911412	856644.163635402	749275.229855101	810856.029186143			757123.334990984		376657.937158768	959020.068133329	604943.787172388	528765.732240362	585248.317689343			1103006.46839253	753353.605697653	584995.663281428	1333366.87374248	827026.655954009	885112.740732604
BGI0879	Aloenin 芦荟宁	#N/A	38412-46-3	638014.46331299	372339.333190572	1288513.57858678	420404.814451229	567016.552137209	998975.494762189			351773.093346972		1429650.38118736	291760.189008328	339009.968910337	619299.279803216	650114.146004604			944942.149720329	658347.601363497	644517.906301975	557691.877840523	926876.434136911	909817.053536684
BGI0882	4'-O-Glucosylvitexin 牡荆素葡萄糖苷	#N/A	38950-94-6	45593.2345119507	39811.1787995665	164199.053729935	196931.389051465	265909.502879226	158140.563231761			333069.372652433		317561.138879963	299673.367222253	463157.751238621	204246.791384321	356954.831466832			152296.866809964	105679.299563794	230010.248101114	243468.184665405	236832.725339861	323309.809511979
BGI0889	9-Methoxycamptothecin 9-甲氧基喜树碱	#N/A	39026-92-1	107015.92851166	123969.168147576	231824.091191754	321859.381945255	123592.279002643	332512.332626243			90482.7849836073		46545.9560686944	152193.953747961	33083.3476153687	85263.64462965	97294.8955070463			177829.280031329	196789.218217261	211518.946544437	244364.944050471	109632.147141681	111354.02591417
BGI0893	Ethyl 3,4-dihydroxybenzoate 3,4-二羟基苯甲酸乙酯	#N/A	3943-89-3	86140.4556575637	606190.329009705	40126.6928860056	495632.243272679	263573.852612501	63982.4594972974			672458.285801413		202600.049786795	224172.309199056	282758.980280139	391709.93715144	472414.244812521			248464.779409326	182415.99127423	264851.091723487	349360.356353613	132132.247222304	414100.893391396
BGI0903	trans-Nerolidol	#N/A	40716-66-3	1414871.33257227	1417891.10489064	2991010.02982342	1193312.19764244	1164994.22741088	2862688.63537401			1081843.95689569		1807039.80090048	1670669.60038495	1252860.19396872	1249843.00609934	968883.13961298			1229039.4260653	1068085.34559005	1456642.40613127	1740001.52212965	1499799.75103514	1347105.84041154
BGI0908	Neobavaisoflavone 新补骨脂异黄酮	#N/A	41060-15-5	527167.801753373	809966.311406983	720341.426558591	1078049.16202533	1153218.9120773	468113.118130063			1225710.96526083		809995.911607951	1172277.40043607	791954.852273204	756900.053745259	891697.616899533			727239.05646052	868564.368452102	944891.147370237	1063220.59446636	1219288.38998284	757603.585993291
BGI0971	α-Boswellic acid α-乳香酸	#N/A	471-66-9	30224.0792969223	33416.6815798387	206692.1517696	15631.0243654633	47782.2379009724	32371.1697084524			9509.29907365448		36826.023057893	19244.6381741347	26311.534383579	29605.5504310532	53363.4004388051			16147.3109068801	83596.6818327391	21138.4301144753	30700.5873734343	101900.995116129	15072.9119997992
BGI0984	Aristolochic acid B 马兜铃酸B	#N/A	475-80-9	429273.216487123	307096.014956731	156752.110758995	360669.166059596	450797.315714112	265012.755377217			425341.461256543		1668609.41676389	376135.816986593	582570.095454219	300210.968065577	803819.23889967			659521.769208877	431743.879906138	333747.347470071	449961.44883193	501859.44604051	598387.78086038
BGI0985	Nuciferine 荷叶碱	#N/A	475-83-2	82831.6575799423	127732.655777792	21973.1933393104	140485.229874553	10123.6987673552	11258.483536847			68872.1956139725		53767.5534435	42325.2413978225	58633.7480578325	49966.684183682	59476.6566071094			32273.2500871357	16647.8931325878	89699.8676338443	77175.9875659839	10216.0654609945	111987.237886445
BGI1098	p-Coumaric acid 对羟基肉桂酸	#N/A	501-98-4	63863161.7711123	77412778.5499999	35438179.3472833	136574660.341616	80991938.0176439	33415036.5707729			6173600.29504754		12070359.467894	35750954.2139595	155046648.186523	9194539.40483383	5127128.36313034			389712.463554457	17811843.780855	54696602.1634686	56853662.1724587	71416114.3172847	731013.617276967
BGI1124	Hastatoside 5-羟基马鞭草苷	#N/A	50816-24-5	130246.849589815	287582.217202342	1012549.32889788	1022012.4038216	195373.017680828	471861.193756044			2603702.664347		314429.927406503	2332623.22122332	717010.960971811	2642031.93404543	579468.465227603			192670.97272988	41075.3605827821	284450.076101569	216371.53606233	136863.820220728	390030.614912804
BGI1146	(±)-α-Bisabolol	#N/A	515-69-5	1436838.82434954	1446436.12904034	3046447.35078157	1221325.22120832	1222122.88779607	2894938.62348178			1183695.31734073		1976052.61006671	1724524.34124022	1282274.60252661	1279485.81094418	987312.670654276			1286892.69003765	1094928.74607781	1495561.21009209	1778623.81546783	1524430.17578008	1482336.89179978
BGI1179	Luteolin 3',7-di-O-glucoside	#N/A	52187-80-1	5586805.40418012	13451145.198517	10328337.8756668	5619016.45567646	5441796.85797298	2655693.35340847			1058369.09308346		2856183.89369644	5669677.56741659	4758355.08084637	1462910.57825673	815708.92800452			2172917.84666501	3991123.17763245	4321493.47285528	6459328.02493015	2188487.46025337	2139575.55783412
BGI1185	Tetrahydroberberine THB 四氢小檗碱	#N/A	522-97-4	2654917.56159394	944126.352024372	1892506.97295781	1257797.6113944	4352970.35632504	1190148.73667557			8614821.19571041		15040075.5497134	765421.456589864	3236896.64405287	6472313.61966933	2387755.27780621			1976178.47433953	5674366.26022732	1178052.99545997	1630140.54393902	11443219.9514853	286378.749170499
BGI1192	Isobutyrylshikonin 异丁酰紫草素	#N/A	52438-12-7	1294233.0939308	647597.272321172	1622228.46621803	1359440.9239387	3781739.545166	2355148.72704368			1453623.26401961		773073.074682571	1745881.40071824	1584695.45000418	831707.981042478	717938.718495295			2885827.16042384	2761887.45023177	1686860.0081479	823977.717324829	1033656.04956337	1666776.73696596
BGI1211	Ajugol 益母草苷	#N/A	52949-83-4	128842.825260021	181725.548223436	186876.992518821	129857.466239439	207967.644888079	110342.2629228			156545.074185718		411845.295866966	108897.718693978	170545.048918417	148778.162490129	186129.885680357			239203.050243991	137817.057590852	108808.742757075	109085.509986248	195209.029277411	214396.52792731
BGI1215	Tropic acid	#N/A	529-64-6	14009.4279491374	20720.6304139256	23526.0222960024	34467.0394889738	36564.8494962863	43256.1287820028			16976.3929536291		15993.1130541094	10746.9433835102	58710.3172207711	17732.0365510504	14895.451751718			9013.0399827959	31826.4310881399	47849.3845038948	97601.6212313728	36833.4902751006	14189.7046514559
BGI1246	D-Glucose 6-phosphate	#N/A	54010-71-8	852470.031382339	397472.624252995	320683.069233159	381145.165314035	650289.821267207	839767.107778484			1267990.51047467		1108259.71599345	343764.160743947	784140.239965204	892160.186089621	811000.241810278			629674.210093615	1090405.50757508	686351.334347964	749426.391373673	578150.941904549	911474.917609551
BGI1280	Di-O-methylquercetin	#N/A	552-54-5	6834102.86996677	11202654.3754929	17500309.3456861	10164092.0404887	10717179.3987253	18956467.734585			11017665.0323519		8022881.83118901	15491278.3994785	7969292.95558778	7524851.9282907	8549730.27645255			8542667.70863447	10623809.5427599	9342019.18380081	11517022.1251922	10699254.5518184	7953422.79423047
BGI1313	Tanshinone IIA 丹参酮IIA	#N/A	568-72-9	267629.378386607	1573112.09129278	1018540.32882139	1318342.54077952	629395.839921747	1526115.45775436			2101704.03731086		3758910.4582881	1065589.32243553	1001792.64330624	661128.535603875	401872.004672684			2093847.31536519	1205326.53832279	1817304.47136228	1698095.41920291	807478.670261859	2186730.11329162
BGI1323	8-O-Acetyl shanzhiside methyl ester 8-O-乙酰山栀苷甲酯	#N/A	57420-46-9	792595.808659933	525295.363511297	553777.294879233	519460.808054567	370053.824850756	484981.596945813			359416.118756114		353789.246663651	443217.195778684	452439.891502535	395782.376784331	396839.318466167			422643.379956353	387951.157024122	351292.540684965	522277.835650461	443101.946102965	403405.367532408
BGI1343	Schisandrol B 五味子醇乙	#N/A	58546-54-6	1188363.11120271	1296826.05656714	1127523.70470068	1654206.0542695	735742.06255376	1516629.07691934			1185330.68087321		679382.350846278	873971.105864451	486690.007315062	185632.357432417	284620.760124539			881847.9555144	1177614.84160365	1263182.99822852	2326566.66611328	1478712.42196388	1566222.67576854
BGI1387	Thiocolchicoside 硫秋水仙苷	#N/A	602-41-5	321922.17105724	282055.66716785	454246.267572221	220420.76988755	315490.864055025	385376.023843957			450696.593286738		1140431.50201435	443375.627376475	680123.766726175	698450.007336241	616108.67769768			415503.280379554	406082.801955199	383771.70399687	465953.989262275	487855.516279046	541008.907933652
BGI1395	Narcissoside 水仙苷	#N/A	604-80-8	79262.8549968035	37513.3350982913	18222.5141669927	68024.8279793779	68823.7259550308	15953.2013140836			224556.604762119		313015.369231547	49271.0266737185	85942.5046349205	156814.471750015	247484.71650111			119864.300215264	122289.401565068	51483.9126593796	38477.1415973657	99606.8709144937	114532.42107371
BGI1417	Trigonelline HCl 盐酸胡芦巴碱	#N/A	6138-41-6	3357232.10210103	15514886.2421862	1423032.36397612	39395874.9307805	2725801.68955134	742630.78799888			14508923.2687368		4849157.41638068	8504730.59385371	9075386.47188111	20363686.2121791	17481433.4855837			3554968.14949796	4443590.99412003	7867263.38086798	9218669.57724827	1613229.99994837	12554975.841466
BGI1466	Picroside III 胡黄连苷III	#N/A	64461-95-6	135208.120746947	87812.8048430061	95952.8846854386	90703.7377028641	134677.446368015	111596.848906392			110034.175773222		220970.481142541	101405.824501453	184842.517021879	55176.9800548262	189386.983429097			58987.9083676798	111723.181207486	105147.285521653	262895.651565155	135229.547564309	102063.90169235
BGI1473	Neomangiferin 新芒果苷	#N/A	64809-67-2	117092.547569935	362547.401848735	106842.59544583	174679.732087778	194445.941838702	119068.763838216			333042.383156482		225198.020022827	159871.885043953	143654.688124529	122184.897516755	250171.608423496			205010.230529133	168914.65971794	299165.023015093	413494.559425921	155910.169829843	402023.814138352
BGI1490	Punicalin 安石榴林	#N/A	65995-64-4	656786.788611346	326609.812711119	649176.735398056	515128.774501172	1433706.35775348	1130689.91504866			796179.134855039		556598.163405304	744760.535950625	881539.861373629	517590.47251592	720541.83205039			1640010.92895836	1420497.54276887	950890.94638018	534965.688502137	502732.423120077	704533.843890883
BGI1502	Jatrorrhizine hydrochloride 盐酸药根碱	#N/A	6681-15-8	12346533.5038538	6367144.72927248	5582401.51844851	6113716.83568752	22603975.4112532	21102709.361704			12852588.8979006		8639732.28431007	12559968.5754681	10977251.4486051	6706510.83091519	12669911.9101372			29413056.3699137	26597655.5582899	14137789.4077769	6689878.69885258	11514364.7914325	14460556.5496543
BGI1530	S-Methyl-L-cysteine sulfoxide	#N/A	6853-87-8	114018.716526929	826993.519119979	234794.374273016	1041748.14899081	300305.315903992	276848.633599695			915324.764539368		281653.054713803	326784.374274601	296883.256229335	464907.409361215	834124.780945033			366481.396713696	326969.767916195	177547.014568029	240107.822446421	372027.837774166	295552.921589603
BGI1543	Harpagide	#N/A	6926-08-5	904024.109928189	875950.316036133	854795.178940337	386053.216515738	397215.694886468	607376.439306438			344619.877308807		379942.437255751	396205.019612868	419069.409526147	383323.436401952	174140.175463539			448890.774577518	594253.842655222	477989.37360813	337612.013057244	159043.76666023	452912.675525856
BGI1586	Atractylenolide III 白术内酯III	#N/A	73030-71-4	961427.32686853	1542119.08430762	1030567.45361245	1816432.38001038	1615164.06640085	938467.383039907			2373351.31484295		5694648.16036858	1552782.08875569	1474322.8247036	916403.229758912	2633908.08924366			1968831.45759132	1355796.42659305	1828535.69296797	1564105.44957597	1535728.62113823	2453144.59356479
BGI1588	Atractylenolide II 白术内酯II	#N/A	73069-14-4	141192785.04547	103618549.195313	77451009.9531158	52211025.1212964	3129853.90002546	59440099.782441			31211876.6423805		42206460.9149063	55137182.2269445	38034488.3523541	61553598.7940053	27656741.9238927			13383225.8442881	9957923.51048816	21861809.8313725	50926965.4778975	33016183.0077988	17992514.2486241
BGI1597	Naringenin chalcone 柚皮苷查尔酮	#N/A	73692-50-9	26379.8645338651	166099.639096158	155838.994244291	257026.453413736	241167.354291306	59885.0957281575			598843.935787628		29954.92774038	123078.546935677	68368.9702028741	48894.8214784231	110835.360400036			77394.7936440342	26146.0641361333	236910.376016948	244608.520601847	169533.45180288	86532.1166009533
BGI1613	(+)-Usniacin 松萝酸	#N/A	7562-61-0	157244.947059021	244902.665991601	194240.321622861	108043.773107524	265610.668044707	181850.812655758			112258.310161836		113595.834276655	111846.706843775	155611.327532441	95627.8225453458	66113.1001303295			240549.46902133	305425.223911942	175011.19287397	131778.891054448	126219.642332653	129817.500201883
BGI1680	Prim-O-glucosylcimifugin 升麻素苷	#N/A	80681-45-4	148899.765411563	876746.768395567	510609.977087432	1428313.11672302	953413.050303861	505703.650663436			2269961.55312866		1223014.62740585	3205824.97364698	2036016.88480522	2090693.22028528	1566455.426107			1273763.64979541	1057017.0430593	1283566.51646876	1075199.58984404	1351150.74024025	1226955.92455521
BGI1692	Baicalin methyl ester 黄芩苷甲酯	#N/A	82475-03-4	1307984.44333372	1337623.86396278	885075.343595831	2490780.04926632	1698925.7126645	421523.782496199			10394642.5066353		15948725.6887158	2136056.41770002	3469060.72684607	3295911.82513807	13805176.3225451			2819239.66035694	2187965.2362234	1922071.15922083	809475.467712903	2304787.92378642	2197229.91908645
BGI1709	5-O-Methylvisammioside 5-O-甲基维斯阿米醇苷	#N/A	84272-85-5	153587.550348077	119969.747592214	128383.120204045	112411.510234161	58975.9335182671	98008.8273045569			81490.2847768801		74689.2094924804	94794.9060117973	77317.5353524876	85409.4690493326	61644.6355810739			80609.2956167731	68419.9434548687	81007.1606302103	82478.0028659362	73400.8063020602	84273.9346842394
BGI1710	Eurycomanone 宽缨酮	#N/A	84633-29-4	2273741.32670894	113074.786591873	726328.444869393	59026.3374032193	10194.7771295298	1696448.31568121			67828.6017705061		18990.7572474249	70330.42678619	26600.4918199066	103917.461818987	29454.0802716765			12808.4643428717	21977.3424366803	28163.3294340168	306.21052172985	3003.30174388533	55202.1039778778
BGI1716	Qingyangshengenin 青阳参苷元	#N/A	84745-94-8	90377.5661178472	37443.2701690054	25654.8578913306	78369.3432667699	278295.480700739	821621.232324896			34117.7217158521		22821.1799860724	950408.35060187	44779.287254229	10611.1214585162	123117.440021072			99894.364568968	49595.4611163717	1765770.29108702	1338477.01037135	1278409.7854834	22454.3544194728
BGI1717	Rosavin 络塞维	#N/A	84954-92-7	152965.465494135	99374.9480717	780339.021273309	131204.681069781	302469.002391263	198130.491458754			178299.607533762		3036421.73294303	90656.4806391881	209533.337456592	555790.084001849	360026.419973715			300819.680986476	499742.722183509	292649.083306359	186821.226525394	496766.769516636	434679.460137153
BGI1721	Pyridoxal 5-phosphate	#N/A	853645-22-4	66018.0328898173	49307.1215625835	141034.030986257	849460.604699058	598573.816375779	66929.310892848			1059146.79041126		1921997.30429485	582173.70943543	670074.064090493	1118637.21838688	1925198.6692511			325403.966699412	316237.086623064	296416.461589533	106655.709612521	287648.739755071	410401.126296241
BGI1722	Curculigoside 仙茅苷	#N/A	85643-19-2	1937.51505592964	25293.4394722194	7152.30363043873	61776.7026619817	16920.4716148631	5521.60399369489			3283966.91214423		709824.933622891	116802.495232262	4833.88417932165	224257.733647347	327946.144351873			875701.641225636	44086.953832959	140035.703851914	52259.5976452258	19999.3650989624	438013.280053525
BGI1727	2''-O-β-L-Galactopyranosylorientin 荭草素-2''-O-β-L半乳糖苷	#N/A	861691-37-4	44754629.46157	12498679.6900111	49313367.0230362	36540257.9183381	36585497.3783563	44841828.5199824			16763396.849633		11407628.2058308	16903372.0291561	36504585.4307337	10111810.1302281	10022870.2794988			4208840.01134103	13549278.6042502	15924195.4528196	32729279.8010148	9461065.92885914	6710903.83516185
BGI1732	N-Acetyl-DL-tryptophan	#N/A	87-32-1	31318.0241793955	23764.8800965733	13054.3808701049	10006.5214606986	4844.02859636852	9031.59341597137			444675.936467584		1102536.0442906	10540.5022106306	11183.6554772954	80999.6108687095	35724.6345989751			3950.85509916264	21537.3456935263	34656.8282428033	2383.0734434625	6592.93137703243	23383.613547618
BGI1771	Ureidosuccinic acid	#N/A	923-37-5	106931.186302455	80992.1984614986	14746.5662716283	24340.3159983596	35862.4729926475	42017.2251232057			75484.6221221428		86037.9461812885	7610.71789086866	34053.2236792567	94241.9583524491	51551.9069664743			43745.010073861	60148.1846413415	46160.9311918507	39835.2051450377	9275.14880060774	44676.8052335148
BGI1781	17-Hydroxyisolathyrol 17-羟基异千金二萜醇	#N/A	93551-00-9	170539.844107811	186710.167478349	287429.96708793	195836.479472035	148711.983621899	300520.390044649			140009.509665967		103186.550672355	239526.971551663	137558.324294375	135606.066186675	135900.480083253			128726.76666957	150038.889415517	133218.158447886	166251.43530919	138579.992645805	120978.025539553
BGI1792	7-O-Ethylmorroniside 7-氧乙基莫诺苷	#N/A	945721-10-8	22254.4597129891	17680.6704208261	8337.49701362332	18125.5140159895	20702.1461959347	7064.17448715677			19057.5829747948		60318.6251434849	9897.17390444771	21644.4615949449	18228.052460336	44826.5557881705			40589.7660703989	32503.9720852666	35372.2441331272	35784.8750621565	31674.7355287863	62821.2064754576
BGI1803	Lactobionic acid	#N/A	96-82-2	108782.033189879	223630.095522484	137796.979853461	586368.114191462	393122.95693545	63389.3824868722			683390.031272819		607925.64881824	299266.48607338	196383.495259554	569627.437694367	678738.136535066			665826.428563086	386137.182721058	313055.042446551	141598.505739921	255312.291322689	313253.252097742
BGI1807	N-Acetyl-DL-serine	#N/A	97-14-3	7519478.59842923	5075057.34975949	6383049.41894857	5134154.79033186	7510272.7326853	6151925.09984215			7220593.81539284		1931613.25204057	8326168.58122789	6051461.48531583	5004303.444371	4645771.20505021			11008514.2119509	8636328.95752298	7910007.01181583	8825963.53083979	9182794.7126155	4770330.35314984

## Sheet: Table S2. DEMs
Supplementry Table S2: CaO NPs exhibited change in metabolite expression compared to control plants following the and drought treatment
Ck Vs Drought								Drought Vs Ca-NPs+Drought								Ck Vs D Vs D+Ca-NPs
BGI_num	Name	Class	P.value	VIP	Ratio			BGI_num	Name	Class	P.value	VIP	Ratio			BGI_num	Name	Class	P.value	VIP	ratio
BGI0176	4-Acetamidophenol	Phenols	0.0910465	1.33598	2.10256			BGI0176	4-Acetamidophenol	Phenols	0.271862	0.557007	0.752934			BGI0176	4-Acetamidophenol	Phenols	0.177286	1.15925	1.58309
BGI0181	Octopamine	Phenols	0.72922	0.534437	1.13767			BGI0181	Octopamine	Phenols	0.793932	0.28004	0.888759			BGI0181	Octopamine	Phenols	0.873114	0.299148	1.01112
BGI0202	5-Aminolevulinic acid	Carboxylic acids and derivatives	0.0183739	0.970379	1.72145			BGI0202	5-Aminolevulinic acid	Carboxylic acids and derivatives	0.444697	0.739526	0.841907			BGI0202	5-Aminolevulinic acid	Carboxylic acids and derivatives	0.00104786	0.906655	1.4493
BGI0215	m-Cresol	Phenols	0.0753625	0.963204	1.60316			BGI0215	m-Cresol	Phenols	0.25873	0.390578	1.12001			BGI0215	m-Cresol	Phenols	0.0358035	1.22673	1.79556
BGI0218	Melamine	Triazines	0.533446	1.02663	0.574755			BGI0218	Melamine	Triazines	0.463314	0.445736	0.861747			BGI0218	Melamine 三聚氰胺	Triazines	0.369018	1.5584	0.495293
BGI0225	Succinic acid	Carboxylic acids and derivatives	0.18032	0.540085	0.796259			BGI0225	Succinic acid	Carboxylic acids and derivatives	0.90335	0.161393	0.991204			BGI0225	Succinic acid	Carboxylic acids and derivatives	0.172365	0.512692	0.789255
BGI0226	Maleic acid	Carboxylic acids and derivatives	0.124186	0.443049	0.837939			BGI0226	Maleic acid	Carboxylic acids and derivatives	0.802505	0.196063	0.981569			BGI0226	Maleic acid 马来酸	Carboxylic acids and derivatives	0.102004	0.502158	0.822494
BGI0227	Fumaric acid	Carboxylic acids and derivatives	0.0953638	0.409643	0.835732			BGI0227	Fumaric acid	Carboxylic acids and derivatives	0.404687	0.332868	0.924712			BGI0227	Fumaric acid 富马酸	Carboxylic acids and derivatives	0.0353123	0.658122	0.772811
BGI0232	Agnuside	Prenol lipids	0.687277	0.322001	0.991561			BGI0232	Agnuside	Prenol lipids	0.0220893	0.785155	1.28987			BGI0232	Agnuside 慧花牡荆苷	Prenol lipids	0.172548	0.703597	1.27898
BGI0268	All trans-Retinal	Prenol lipids	0.972875	0.304523	1.00013			BGI0268	All trans-Retinal	Prenol lipids	0.0174622	0.940682	1.29937			BGI0268	All trans-Retinal	Prenol lipids	0.0275412	0.692761	1.29953
BGI0273	Quercetin	Flavonoids	0.984322	0.273178	1.08833			BGI0273	Quercetin	Flavonoids	0.817714	0.362458	0.904979			BGI0273	Quercetin 槲皮素	Flavonoids	0.745068	0.586069	0.984921
BGI0276	Guanosine	Purine nucleosides	0.843689	0.772711	0.792996			BGI0276	Guanosine	Purine nucleosides	0.623355	0.321569	0.95552			BGI0276	Guanosine 鸟苷	Purine nucleosides	0.630629	1.49385	0.757723
BGI0284	N-Acetyl-L-leucine	Carboxylic acids and derivatives	0.225635	0.92383	4.41106			BGI0284	N-Acetyl-L-leucine	Carboxylic acids and derivatives	0.0623091	2.22206	0.104171			BGI0284	N-Acetyl-L-leucine	Carboxylic acids and derivatives	0.329413	0.62919	0.459503
BGI0286	L-Homocitrulline	Carboxylic acids and derivatives	0.00896755	0.916828	1.6724			BGI0286	L-Homocitrulline	Carboxylic acids and derivatives	0.283484	0.578994	0.839981			BGI0286	L-Homocitrulline	Carboxylic acids and derivatives	0.125056	0.809389	1.40479
BGI0295	Dihydrocoumarin	3,4-dihydrocoumarins	0.268025	0.576083	0.78208			BGI0295	Dihydrocoumarin	3,4-dihydrocoumarins	0.983017	0.350839	0.985605			BGI0295	Dihydrocoumarin	3,4-dihydrocoumarins	0.240768	0.482042	0.770822
BGI0300	Vanillin	Phenols	0.645544	0.307228	1.08826			BGI0300	Vanillin	Phenols	0.793006	0.510221	0.992972			BGI0300	Vanillin 香兰素	Phenols	0.449154	0.660798	1.08061
BGI0312	1-Caffeoylquinic acid 1	Organooxygen compounds	0.605004	0.430809	0.716459			BGI0312	1-Caffeoylquinic acid	Organooxygen compounds	0.306775	0.518085	1.32553			BGI0312	1-Caffeoylquinic acid 1-咖啡酰奎宁酸	Organooxygen compounds	0.865995	0.875332	0.949691
BGI0313	Spermidine	Organonitrogen compounds	0.508823	0.539664	0.765614			BGI0313	Spermidine	Organonitrogen compounds	0.390639	0.604416	1.34254			BGI0313	Spermidine	Organonitrogen compounds	0.332394	1.20911	1.02787
BGI0340	Decursinol angelate	Coumarins and derivatives	0.514707	0.306583	1.26121			BGI0340	Decursinol angelate	Coumarins and derivatives	0.166769	1.00171	0.641681			BGI0340	Decursinol angelate 紫花前胡醇当归酸酯	Coumarins and derivatives	0.285854	0.615992	0.809296
BGI0348	Camelliaside B	Flavonoids	0.00460913	1.72393	4.3375			BGI0348	Camelliaside B	Flavonoids	0.390847	0.546834	0.673564			BGI0348	Camelliaside B 山茶苷B	Flavonoids	0.00957785	1.51818	2.92158
BGI0381	D-Erythronic acid	Organooxygen compounds	0.0467681	0.544772	0.725621			BGI0381	D-Erythronic acid	Organooxygen compounds	0.914101	0.745244	1.09342			BGI0381	D-Erythronic acid	Organooxygen compounds	0.25706	0.734045	0.793409
BGI0386	Agomelatine	Carboxylic acids and derivatives	0.499212	0.756371	0.82797			BGI0386	Agomelatine	Carboxylic acids and derivatives	0.792234	0.353036	1.00595			BGI0386	Agomelatine	Carboxylic acids and derivatives	0.557164	0.514133	0.832896
BGI0388	Marmesin	Coumarins and derivatives	0.0761006	0.773	1.59601			BGI0388	Marmesin	Coumarins and derivatives	0.29933	0.960967	0.817968			BGI0388	Marmesin 异紫花前胡内酯	Coumarins and derivatives	0.783519	0.316223	1.30549
BGI0390	Shikimic acid	Organooxygen compounds	0.138045	0.310175	0.857648			BGI0390	Shikimic acid	Organooxygen compounds	0.289265	0.720165	0.861099			BGI0390	Shikimic acid 莽草酸	Organooxygen compounds	0.0917705	0.892068	0.73852
BGI0418	Pregnenolone	Steroids and steroid derivatives	0.0433165	1.19749	3.19174			BGI0418	Pregnenolone	Steroids and steroid derivatives	0.906055	0.946145	0.996522			BGI0418	Pregnenolone	Steroids and steroid derivatives	0.0495224	1.41123	3.18065
BGI0423	Flavin mononucleotide	Flavin nucleotides	0.474366	0.420916	0.979736			BGI0423	Flavin mononucleotide	Flavin nucleotides	0.0389412	1.03021	1.83156			BGI0423	Flavin mononucleotide	Flavin nucleotides	0.10079	1.35861	1.79444
BGI0436	Bicine	Carboxylic acids and derivatives	0.753971	0.189742	1.09525			BGI0436	Bicine	Carboxylic acids and derivatives	0.954765	0.54044	0.989529			BGI0436	Bicine	Carboxylic acids and derivatives	0.660144	0.203931	1.08378
BGI0445	Ginkgolide B	Prenol lipids	0.0393767	1.8794	3.30017			BGI0445	Ginkgolide B	Prenol lipids	0.728421	0.355496	0.801538			BGI0445	Ginkgolide B 银杏内酯B	Prenol lipids	0.0465205	2.04176	2.64522
BGI0449	Rutin	Flavonoids	0.0670734	1.16492	0.571944			BGI0449	Rutin	Flavonoids	0.212052	1.0813	1.46117			BGI0449	Rutin 芦丁	Flavonoids	0.329321	0.497317	0.835709
BGI0478	Doxepin	Benzoxepines	0.855145	0.217847	0.831894			BGI0478	Doxepin	Benzoxepines	0.659139	0.444723	0.882239			BGI0478	Doxepin	Benzoxepines	0.632552	0.430583	0.733929
BGI0515	3-Methoxyphenylacetic acid	Phenol ethers	0.589819	0.305783	0.730662			BGI0515	3-Methoxyphenylacetic acid	Phenol ethers	0.759399	0.127678	0.98165			BGI0515	3-Methoxyphenylacetic acid	Phenol ethers	0.538715	0.451636	0.717254
BGI0539	1-Deoxynojirimycin	Piperidines	0.0373406	0.998647	0.454184			BGI0539	1-Deoxynojirimycin	Piperidines	0.15058	0.884506	1.59524			BGI0539	1-Deoxynojirimycin 1-脱氧野尻霉素	Piperidines	0.376032	0.52741	0.724532
BGI0551	N-α-Acetyl-L-lysine	Carboxylic acids and derivatives	0.00311443	1.12522	1.92893			BGI0551	N-α-Acetyl-L-lysine	Carboxylic acids and derivatives	0.160369	0.696128	0.796024			BGI0551	N-α-Acetyl-L-lysine	Carboxylic acids and derivatives	0.059982	0.887462	1.53548
BGI0572	Diosmetin-7-O-β-D-glucopyranoside	Flavonoids	0.951779	0.739944	0.939059			BGI0572	Diosmetin-7-O-β-D-glucopyranoside	Flavonoids	0.61551	1.19461	1.0699			BGI0572	Diosmetin-7-O-β-D-glucopyranoside 香叶木素-7-O-β-D-葡萄糖苷	Flavonoids	0.65981	0.825511	1.0047
BGI0608	5-Methylcytidine	Pyrimidine nucleosides	0.0920189	0.857831	0.540065			BGI0608	5-Methylcytidine	Pyrimidine nucleosides	0.24044	0.579937	1.19637			BGI0608	5-Methylcytidine	Pyrimidine nucleosides	0.255898	0.719639	0.646118
BGI0611	Glucoraphanin	Organooxygen compounds	0.0224694	1.53476	2.69376			BGI0611	Glucoraphanin	Organooxygen compounds	0.214119	0.850643	0.621686			BGI0611	Glucoraphanin 萝卜硫苷	Organooxygen compounds	0.0758168	1.2137	1.67467
BGI0614	S-Allyl-L-cysteine	Carboxylic acids and derivatives	0.634232	0.418606	0.958604			BGI0614	S-Allyl-L-cysteine	Carboxylic acids and derivatives	0.267716	0.661959	1.18307			BGI0614	S-Allyl-L-cysteine	Carboxylic acids and derivatives	0.354541	0.534435	1.13409
BGI0616	N-Propionylglycine	Carboxylic acids and derivatives	0.046226	0.673612	1.44101			BGI0616	N-Propionylglycine	Carboxylic acids and derivatives	0.0240685	0.800636	1.35914			BGI0616	N-Propionylglycine	Carboxylic acids and derivatives	0.0029203	1.44169	1.95853
BGI0642	1H-imidazole-1-acetic acid	Carboxylic acids and derivatives	0.101942	0.46839	0.793529			BGI0642	1H-imidazole-1-acetic acid	Carboxylic acids and derivatives	0.163437	0.49195	1.13789			BGI0642	1H-imidazole-1-acetic acid	Carboxylic acids and derivatives	0.479712	0.302908	0.902952
BGI0645	Neferine	Isoquinolines and derivatives	0.025902	1.5213	0.318604			BGI0645	Neferine	Isoquinolines and derivatives	0.059153	1.78106	1.98021			BGI0645	Neferine 甲基莲心碱	Isoquinolines and derivatives	0.390969	0.699942	0.630902
BGI0659	Norisoboldine	Aporphines	0.00154775	2.29699	7.19255			BGI0659	Norisoboldine	Aporphines	0.0446644	0.632306	0.605385			BGI0659	Norisoboldine 去甲异波尔定	Aporphines	0.00547876	2.10477	4.35426
BGI0682	Isomangiferin	Benzopyrans	0.0989187	1.06695	3.70656			BGI0682	Isomangiferin	Benzopyrans	0.201233	1.18883	0.321113			BGI0682	Isomangiferin 异芒果苷	Benzopyrans	0.534347	0.433972	1.19022
BGI0683	N-α-Acetyl-L-glutamine	Carboxylic acids and derivatives	0.00027624	1.29782	2.19258			BGI0683	N-α-Acetyl-L-glutamine	Carboxylic acids and derivatives	0.0349621	1.03974	0.686203			BGI0683	N-α-Acetyl-L-glutamine	Carboxylic acids and derivatives	0.0603775	0.747957	1.50455
BGI0684	Bisdemethoxycurcumin	Diarylheptanoids	0.000942886	1.79879	4.7162			BGI0684	Bisdemethoxycurcumin	Diarylheptanoids	0.015568	1.50706	0.410736			BGI0684	Bisdemethoxycurcumin 双脱氧基姜黄素	Diarylheptanoids	0.0418374	0.958687	1.93711
BGI0693	Dexchlorpheniramine	Pyridines and derivatives	0.38336	0.501552	0.831132			BGI0693	Dexchlorpheniramine	Pyridines and derivatives	0.921648	0.349675	0.974096			BGI0693	Dexchlorpheniramine	Pyridines and derivatives	0.3152	0.401498	0.809602
BGI0697	cis-4-Hydroxy-D-proline	Carboxylic acids and derivatives	0.0062852	0.895902	1.6016			BGI0697	cis-4-Hydroxy-D-proline	Carboxylic acids and derivatives	0.271412	0.400967	1.13006			BGI0697	cis-4-Hydroxy-D-proline	Carboxylic acids and derivatives	0.0015143	1.26068	1.80991
BGI0709	Amoxicillin	Lactams	0.0472149	0.919471	1.7082			BGI0709	Amoxicillin	Lactams	0.425335	0.589648	0.802848			BGI0709	Amoxicillin	Lactams	0.0691249	0.693591	1.37143
BGI0733	Orientin	Flavonoids	0.399393	0.67543	1.15681			BGI0733	Orientin	Flavonoids	0.52163	0.388747	1.11462			BGI0733	Orientin 荭草苷	Flavonoids	0.193444	0.906945	1.28941
BGI0761	Astilbin	Flavonoids	0.0679664	1.56756	2.77913			BGI0761	Astilbin	Flavonoids	0.951864	0.414204	1.14841			BGI0761	Astilbin 落新妇苷	Flavonoids	0.0668831	1.36257	3.19159
BGI0787	L-Theanine	Carboxylic acids and derivatives	0.774468	0.36003	1.00395			BGI0787	L-Theanine	Carboxylic acids and derivatives	0.191869	0.393704	1.14275			BGI0787	L-Theanine L-茶氨酸	Carboxylic acids and derivatives	0.306055	0.40256	1.14726
BGI0789	Cynarin	Organooxygen compounds	0.0748162	0.990685	0.537694			BGI0789	Cynarin	Organooxygen compounds	0.436662	1.4594	0.700254			BGI0789	Cynarin	Organooxygen compounds	0.0623059	1.88103	0.376523
BGI0794	Monocrotaline	Pyrrolizines	0.111848	0.768467	1.41212			BGI0794	Monocrotaline	Pyrrolizines	0.576819	0.179111	0.956282			BGI0794	Monocrotaline 野百合碱	Pyrrolizines	0.164362	0.856063	1.35039
BGI0796	Allopurinol	Pyrazolopyrimidines	0.58089	0.4108	0.948516			BGI0796	Allopurinol	Pyrazolopyrimidines	0.981776	0.146352	0.969229			BGI0796	Allopurinol	Pyrazolopyrimidines	0.466884	0.336556	0.919329
BGI0798	5,7-Dihydroxychromone	Benzopyrans	0.0118514	1.45492	2.36656			BGI0798	5,7-Dihydroxychromone	Benzopyrans	0.00175692	0.993888	0.633688			BGI0798	5,7-Dihydroxychromone 5,7-二羟基色原酮	Benzopyrans	0.0901035	0.917946	1.49966
BGI0800	L-(+)-Selenomethionine	Carboxylic acids and derivatives	0.0639561	0.705235	0.67908			BGI0800	L-(+)-Selenomethionine	Carboxylic acids and derivatives	0.0718275	0.754016	1.27197			BGI0800	L-(+)-Selenomethionine	Carboxylic acids and derivatives	0.512922	0.401139	0.863768
BGI0803	D-Glucuro-3,6-lactone	Furofurans	0.631373	0.654038	0.765857			BGI0803	D-Glucuro-3,6-lactone	Furofurans	0.0039628	1.19504	0.575151			BGI0803	D-Glucuro-3,6-lactone	Furofurans	0.0633504	1.25149	0.440484
BGI0810	L-Norleucine	Carboxylic acids and derivatives	0.506066	0.459519	1.09041			BGI0810	L-Norleucine	Carboxylic acids and derivatives	0.0579804	0.79351	1.2667			BGI0810	L-Norleucine	Carboxylic acids and derivatives	0.0413388	0.803597	1.38122
BGI0812	Chlorogenic acid	Organooxygen compounds	0.620483	0.939534	1.13595			BGI0812	Chlorogenic acid	Organooxygen compounds	0.460458	0.814308	1.12711			BGI0812	Chlorogenic acid 绿原酸	Organooxygen compounds	0.220958	0.573363	1.28033
BGI0819	8-Desoxygartanin	Benzopyrans	0.42374	0.439833	0.818486			BGI0819	8-Desoxygartanin	Benzopyrans	0.953403	0.396664	1.0143			BGI0819	8-Desoxygartanin 1,3,5-三羟基-2,4-双(3-甲基-2-丁烯基)氧杂蒽酮	Benzopyrans	0.460297	0.519347	0.830189
BGI0821	Alnustone	Diarylheptanoids	0.323867	0.475681	1.15167			BGI0821	Alnustone	Diarylheptanoids	0.445629	0.460259	1.08988			BGI0821	Alnustone 桤木酮	Diarylheptanoids	0.110899	0.696179	1.25518
BGI0824	Bilobalide	Prenol lipids	0.00104059	2.45729	7.97482			BGI0824	Bilobalide	Prenol lipids	0.0101446	1.13338	0.463582			BGI0824	Bilobalide 白果内酯	Prenol lipids	0.00687728	1.82262	3.69698
BGI0825	Acesulfame	Organic sulfuric acids and derivatives	0.379229	0.439741	0.795651			BGI0825	Acesulfame	Organic sulfuric acids and derivatives	0.894104	0.476186	1.02984			BGI0825	Acesulfame	Organic sulfuric acids and derivatives	0.412397	0.497887	0.819397
BGI0836	D-Proline	Carboxylic acids and derivatives	0.00172148	2.14896	6.45813			BGI0836	D-Proline	Carboxylic acids and derivatives	0.151843	0.87229	0.536935			BGI0836	D-Proline	Carboxylic acids and derivatives	0.00738891	1.84126	3.46759
BGI0845	Ipriflavone	Isoflavonoids	0.0120422	1.80069	0.125954			BGI0845	Ipriflavone	Isoflavonoids	0.554402	0.596665	2.58193			BGI0845	Ipriflavone	Isoflavonoids	0.0502942	1.79185	0.325204
BGI0848	Methyl p-tert-butylphenylacetate	Benzene and substituted derivatives	0.0132428	0.975079	0.55871			BGI0848	Methyl p-tert-butylphenylacetate	Benzene and substituted derivatives	0.970372	0.279334	1.00014			BGI0848	Methyl p-tert-butylphenylacetate	Benzene and substituted derivatives	0.0134272	1.0766	0.558787
BGI0863	Puerarin	Isoflavonoids	0.0494349	0.771013	1.4884			BGI0863	Puerarin	Isoflavonoids	0.5181	0.511402	0.959188			BGI0863	Puerarin 葛根素	Isoflavonoids	0.392067	0.530616	1.42766
BGI0870	Betamethasone	Steroids and steroid derivatives	0.0553527	0.652868	1.3832			BGI0870	Betamethasone	Steroids and steroid derivatives	0.583732	0.426929	0.944663			BGI0870	Betamethasone	Steroids and steroid derivatives	0.244541	0.656157	1.30665
BGI0892	Methyl vanillate	Benzene and substituted derivatives	0.866265	0.464923	0.903408			BGI0892	Methyl vanillate	Benzene and substituted derivatives	0.313508	0.521152	0.829493			BGI0892	Methyl vanillate 香草酸甲酯	Benzene and substituted derivatives	0.69658	0.308727	0.749371
BGI0928	Dacarbazine	Carboxylic acids and derivatives	0.345191	0.50589	0.838563			BGI0928	Dacarbazine	Carboxylic acids and derivatives	0.524424	0.307041	1.0689			BGI0928	Dacarbazine	Carboxylic acids and derivatives	0.603096	0.221551	0.896337
BGI0929	L-5-Hydroxytryptophan	Indoles and derivatives	0.584039	0.924833	0.694551			BGI0929	L-5-Hydroxytryptophan	Indoles and derivatives	0.0688455	0.653636	0.783686			BGI0929	L-5-Hydroxytryptophan	Indoles and derivatives	0.219041	1.35718	0.54431
BGI0934	Phosphonoacetic acid	Organic phosphonic acids and derivatives	0.613934	1.1025	0.531303			BGI0934	Phosphonoacetic acid	Organic phosphonic acids and derivatives	0.0604977	0.910158	0.663044			BGI0934	Phosphonoacetic acid	Organic phosphonic acids and derivatives	0.226445	1.59301	0.352277
BGI0941	Genistein	Isoflavonoids	0.02656	0.748116	0.675102			BGI0941	Genistein	Isoflavonoids	0.444015	0.333662	0.929837			BGI0941	Genistein 染料木素	Isoflavonoids	0.0119027	0.973285	0.627734
BGI0950	4-Guanidinobutyric acid	Carboxylic acids and derivatives	0.0739504	0.87537	1.48292			BGI0950	4-Guanidinobutyric acid	Carboxylic acids and derivatives	0.834088	0.310448	0.957211			BGI0950	4-Guanidinobutyric acid	Carboxylic acids and derivatives	0.0854991	0.991843	1.41947
BGI0963	(+)-Nootkatone	Prenol lipids	0.0608971	0.787725	0.709115			BGI0963	Nootkatone	Prenol lipids	0.739813	0.348055	0.938025			BGI0963	(+)-Nootkatone 诺卡酮	Prenol lipids	0.0213686	0.873835	0.665167
BGI0968	Isoalantolactone	Prenol lipids	0.32546	0.723057	1.20242			BGI0968	Isoalantolactone	Prenol lipids	0.342385	0.377187	1.16663			BGI0968	Isoalantolactone 异土木香内酯	Prenol lipids	0.176908	0.939346	1.40279
BGI0978	α-Cyperone	Prenol lipids	0.597989	0.807363	0.903425			BGI0978	α-Cyperone	Prenol lipids	0.889827	0.547908	0.97711			BGI0978	α-Cyperone α-香附酮	Prenol lipids	0.639206	0.397316	0.882746
BGI0996	Rheic acid	Anthracenes	0.0741982	1.23364	2.34297			BGI0996	Rheic acid	Anthracenes	0.230529	0.918626	0.554539			BGI0996	Rheic acid 大黄酸	Anthracenes	0.262405	0.658661	1.29927
BGI1003	Aucubin	Prenol lipids	0.0257186	0.641676	0.725561			BGI1003	Aucubin	Prenol lipids	0.410411	0.318977	1.13644			BGI1003	Aucubin 桃叶珊瑚苷	Prenol lipids	0.195521	0.786462	0.824556
BGI1004	Astragalin	Flavonoids	0.0258256	0.973146	0.631335			BGI1004	Astragalin	Flavonoids	0.604346	0.340341	0.878672			BGI1004	Astragalin 紫云英苷	Flavonoids	0.00299877	1.18647	0.554737
BGI1009	DIHYDROKAEMPFEROL	Flavonoids	0.63193	0.948058	0.845467			BGI1009	DIHYDROKAEMPFEROL	Flavonoids	0.791737	0.423575	0.914846			BGI1009	DIHYDROKAEMPFEROL	Flavonoids	0.770259	0.641001	0.773473
BGI1014	Naringenin	Flavonoids	0.248303	0.813545	1.27227			BGI1014	Naringenin	Flavonoids	0.00896817	1.02436	1.51636			BGI1014	Naringenin 柚皮素	Flavonoids	0.0293829	1.33958	1.92923
BGI1024	Isoquercitrin	Flavonoids	0.0239495	1.61263	10.8805			BGI1024	Isoquercitrin	Flavonoids	0.0782148	2.5931	0.464605			BGI1024	Isoquercitrin 异槲皮苷	Flavonoids	0.912628	0.669283	5.05514
BGI1046	Ononin	Isoflavonoids	0.0230343	1.03534	1.93937			BGI1046	Ononin	Isoflavonoids	0.00895845	2.40731	0.346847			BGI1046	Ononin 芒柄花苷	Isoflavonoids	0.223204	1.18945	0.672664
BGI1052	Harmol	Harmala alkaloids	0.244671	0.58732	1.26193			BGI1052	Harmol	Harmala alkaloids	0.259051	0.777506	0.795688			BGI1052	Harmol 哈尔酚	Harmala alkaloids	0.965177	0.377864	1.0041
BGI1054	Curcumol	Prenol lipids	0.0878237	0.97392	0.500201			BGI1054	Curcumol	Prenol lipids	0.165001	1.08062	1.53951			BGI1054	Curcumol 莪术醇	Prenol lipids	0.553881	0.489702	0.770065
BGI1062	D-Fructose-1,6-diphosphate	Organooxygen compounds	0.989808	0.335826	0.785843			BGI1062	D-Fructose-1,6-diphosphate	Organooxygen compounds	0.000757467	2.11097	0.288126			BGI1062	D-Fructose-1,6-diphosphate	Organooxygen compounds	0.0254183	1.54374	0.226422
BGI1070	Dehydroascorbic acid	Lactones	0.14446	0.435661	0.784624			BGI1070	Dehydroascorbic acid	Lactones	0.587941	0.434938	1.13328			BGI1070	Dehydroascorbic acid	Lactones	0.485935	0.412176	0.889202
BGI1100	Hydrocortisone	Steroids and steroid derivatives	0.0427161	0.894651	1.53831			BGI1100	Hydrocortisone	Steroids and steroid derivatives	0.0264296	0.843496	0.74309			BGI1100	Hydrocortisone	Steroids and steroid derivatives	0.400185	0.758036	1.1431
BGI1102	Estriol	Steroids and steroid derivatives	0.0192092	1.19703	2.38355			BGI1102	Estriol	Steroids and steroid derivatives	0.41455	0.650912	1.14246			BGI1102	Estriol	Steroids and steroid derivatives	0.00380262	1.60733	2.72312
BGI1119	Serotonin	Indoles and derivatives	0.0321077	0.827502	0.647459			BGI1119	Serotonin	Indoles and derivatives	0.308732	0.698809	1.14419			BGI1119	Serotonin	Indoles and derivatives	0.097983	0.582551	0.740818
BGI1126	Thymidine	Pyrimidine nucleosides	0.629548	0.499676	1.08307			BGI1126	Thymidine	Pyrimidine nucleosides	0.0151206	1.29152	1.69365			BGI1126	Thymidine 胸苷	Pyrimidine nucleosides	0.0178619	1.15791	1.83435
BGI1140	L-Hydroxyproline	Carboxylic acids and derivatives	0.0338427	0.639148	1.37912			BGI1140	L-Hydroxyproline	Carboxylic acids and derivatives	0.0870356	0.65103	1.2733			BGI1140	L-Hydroxyproline L-羟脯氨酸	Carboxylic acids and derivatives	0.00354674	1.24517	1.75604
BGI1147	2-Methylmalonic acid	Carboxylic acids and derivatives	0.891888	0.471423	1.08231			BGI1147	2-Methylmalonic acid	Carboxylic acids and derivatives	0.490387	0.819947	1.13107			BGI1147	2-Methylmalonic acid	Carboxylic acids and derivatives	0.352582	0.559631	1.22417
BGI1150	Tyramine	Benzene and substituted derivatives	0.0324312	0.800398	0.701832			BGI1150	Tyramine	Benzene and substituted derivatives	0.0319625	1.14673	1.48786			BGI1150	Tyramine	Benzene and substituted derivatives	0.835191	0.186628	1.04423
BGI1156	Acetylcholine	Organonitrogen compounds	0.205488	0.617433	1.26885			BGI1156	Acetylcholine	Organonitrogen compounds	0.0168537	1.62301	0.503549			BGI1156	Acetylcholine	Organonitrogen compounds	0.41176	0.63546	0.638929
BGI1170	Tricetin	Flavonoids	0.296329	0.941008	0.496039			BGI1170	Tricetin	Flavonoids	0.691323	0.793248	1.61079			BGI1170	Tricetin	Flavonoids	0.52038	0.590622	0.799014
BGI1175	Medroxyprogesterone	Steroids and steroid derivatives	0.00254861	1.67633	4.5841			BGI1175	Medroxyprogesterone	Steroids and steroid derivatives	0.0270402	1.6024	0.368322			BGI1175	Medroxyprogesterone	Steroids and steroid derivatives	0.0800218	0.779234	1.68842
BGI1198	Tryptophol	Indoles and derivatives	0.0831099	1.21626	2.82095			BGI1198	Tryptophol	Indoles and derivatives	0.160981	1.15771	0.404654			BGI1198	Tryptophol	Indoles and derivatives	0.424271	0.729057	1.14151
BGI1199	D-(-)-Penicillamine	Carboxylic acids and derivatives	0.590082	0.596039	0.850605			BGI1199	D-(-)-Penicillamine	Carboxylic acids and derivatives	0.0579363	0.79222	1.28345			BGI1199	D-(-)-Penicillamine	Carboxylic acids and derivatives	0.427991	0.498348	1.09171
BGI1200	Mucic acid	Organooxygen compounds	0.183051	0.528331	1.22623			BGI1200	Mucic acid	Organooxygen compounds	0.0133088	1.49967	0.582498			BGI1200	Mucic acid	Organooxygen compounds	0.0929495	0.737962	0.714277
BGI1218	3-[(Carboxycarbonyl)amino]-L-alanine	Carboxylic acids and derivatives	0.540415	0.966215	0.743837			BGI1218	3-[(Carboxycarbonyl)amino]-L-alanine	Carboxylic acids and derivatives	0.0137845	0.919268	0.703054			BGI1218	3-[(Carboxycarbonyl)amino]-L-alanine 三七素	Carboxylic acids and derivatives	0.100902	1.06965	0.522958
BGI1220	Sinapic acid	Cinnamic acids and derivatives	0.989811	0.434538	0.984103			BGI1220	Sinapic acid	Cinnamic acids and derivatives	0.236767	0.631779	0.75			BGI1220	Sinapic acid 芥子酸	Cinnamic acids and derivatives	0.282862	0.498873	0.738077
BGI1225	7-Methoxycoumarin	Coumarins and derivatives	0.0116699	0.554207	0.643128			BGI1225	7-Methoxycoumarin	Coumarins and derivatives	0.633244	0.661084	1.09306			BGI1225	7-Methoxycoumarin 甲氧基香豆素	Coumarins and derivatives	0.249139	1.19787	0.702978
BGI1230	Coixol	Benzoxazoles	0.567874	0.338404	0.942941			BGI1230	Coixol	Benzoxazoles	0.351368	1.00168	1.78922			BGI1230	Coixol 薏苡素	Benzoxazoles	0.226333	0.980307	1.68713
BGI1235	Trigonelline	null	0.206807	0.87227	1.23726			BGI1235	Trigonelline	null	0.0294468	1.40444	0.469996			BGI1235	Trigonelline	null	0.932982	0.210415	0.581509
BGI1241	Feruloyltryptamine	Cinnamic acids and derivatives	0.000227813	2.06336	6.33027			BGI1241	Feruloyltryptamine	Cinnamic acids and derivatives	0.0212182	1.50149	0.400723			BGI1241	Feruloyltryptamine	Cinnamic acids and derivatives	0.0161557	1.1667	2.53669
BGI1242	Hordenine	Benzene and substituted derivatives	0.533748	0.253988	1.14599			BGI1242	Hordenine	Benzene and substituted derivatives	0.498414	0.432545	1.17692			BGI1242	Hordenine 大麦芽碱	Benzene and substituted derivatives	0.185775	0.772817	1.34874
BGI1247	L-(-)-Nicotine	Pyridines and derivatives	0.230333	0.696505	0.687622			BGI1247	L-(-)-Nicotine	Pyridines and derivatives	0.339132	0.951492	1.85365			BGI1247	L-(-)-Nicotine	Pyridines and derivatives	0.923854	1.17498	1.27461
BGI1248	L(-)-Carnitine	Organonitrogen compounds	0.754274	1.12517	0.689613			BGI1248	L(-)-Carnitine	Organonitrogen compounds	0.162058	0.980771	0.698253			BGI1248	L(-)-Carnitine 左旋肉碱	Organonitrogen compounds	0.694842	1.34532	0.481524
BGI1251	5-Iodo-2'-deoxyuridine	Pyrimidine nucleosides	0.923368	0.442547	0.931488			BGI1251	5-Iodo-2'-deoxyuridine	Pyrimidine nucleosides	0.737015	0.362376	0.945909			BGI1251	5-Iodo-2'-deoxyuridine	Pyrimidine nucleosides	0.739891	0.501742	0.881103
BGI1270	Isorhamnetin-3-O-nehesperidine	Flavonoids	0.0154993	1.52382	3.85401			BGI1270	Isorhamnetin-3-O-nehesperidine	Flavonoids	0.149037	1.23094	0.457691			BGI1270	Isorhamnetin-3-O-nehesperidine 异鼠李素-3-O-新橙皮苷	Flavonoids	0.0688884	0.888725	1.76395
BGI1278	Isonicotinic acid	Pyridines and derivatives	0.0510876	0.898273	0.736414			BGI1278	Isonicotinic acid	Pyridines and derivatives	0.489802	0.344401	1.1159			BGI1278	Isonicotinic acid	Pyridines and derivatives	0.192955	0.742188	0.821767
BGI1281	Eriodictyol	Flavonoids	0.00926754	1.52502	4.23337			BGI1281	Eriodictyol	Flavonoids	0.48395	0.903325	0.671244			BGI1281	Eriodictyol 圣草酚	Flavonoids	0.01599	1.27175	2.84163
BGI1294	Glycylglycine	Carboxylic acids and derivatives	0.165299	0.691814	0.738328			BGI1294	Glycylglycine	Carboxylic acids and derivatives	0.163426	0.892404	1.34962			BGI1294	Glycylglycine	Carboxylic acids and derivatives	0.997905	0.461358	0.996465
BGI1305	N-Acetyl-L-carnosine	Peptidomimetics	0.0239804	1.15621	0.477136			BGI1305	N-Acetyl-L-carnosine	Peptidomimetics	0.00342253	1.75446	2.1045			BGI1305	N-Acetyl-L-carnosine	Peptidomimetics	0.760267	0.416478	1.00414
BGI1306	Clareolide	Naphthofurans	0.696157	0.817588	0.669371			BGI1306	Clareolide	Naphthofurans	0.0688667	1.08068	0.554348			BGI1306	Clareolide 香紫苏内酯	Naphthofurans	0.146708	1.40325	0.371065
BGI1307	L-Serine	Carboxylic acids and derivatives	0.344279	0.374305	0.84242			BGI1307	L-Serine	Carboxylic acids and derivatives	0.395104	0.403199	1.14637			BGI1307	L-Serine	Carboxylic acids and derivatives	0.874204	0.491862	0.965728
BGI1312	L-Glutamic acid	Carboxylic acids and derivatives	0.13652	0.370336	0.83034			BGI1312	L-Glutamic acid	Carboxylic acids and derivatives	0.576304	0.428263	0.944014			BGI1312	L-Glutamic acid L-谷氨酸	Carboxylic acids and derivatives	0.103738	0.818162	0.783853
BGI1315	DL-β-Leucine	Carboxylic acids and derivatives	0.00167069	1.29218	2.27837			BGI1315	DL-β-Leucine	Carboxylic acids and derivatives	0.22121	0.804676	0.774638			BGI1315	DL-β-Leucine	Carboxylic acids and derivatives	0.00225267	1.14253	1.76491
BGI1321	Isochlorogenic acid C	Organooxygen compounds	0.851902	0.598263	0.821152			BGI1321	Isochlorogenic acid	Organooxygen compounds	0.95673	0.868094	1.46532			BGI1321	Isochlorogenic acid C 异绿原酸C	Organooxygen compounds	0.9414	0.37791	1.20325
BGI1330	Apigenin-7-O-β-D-glucoside	Flavonoids	0.0138175	1.42902	3.40337			BGI1330	Apigenin-7-O-β-D-glucoside	Flavonoids	0.0322571	1.67249	0.376934			BGI1330	Apigenin-7-O-β-D-glucoside 芹菜素-7-O-β-D-吡喃葡萄糖苷	Flavonoids	0.40673	0.453817	1.28285
BGI1340	L-Anserine	Peptidomimetics	0.472071	0.983878	0.706703			BGI1340	L-Anserine	Peptidomimetics	0.197698	0.642026	0.819388			BGI1340	L-Anserine	Peptidomimetics	0.184888	1.22206	0.579064
BGI1348	Maltitol	Fatty Acyls	0.786849	1.5995	0.43008			BGI1348	Maltitol	Fatty Acyls	0.0384864	1.15866	0.50163			BGI1348	Maltitol	Fatty Acyls	0.299808	2.08268	0.215741
BGI1350	Inosine	Purine nucleosides	0.039751	0.960897	0.558766			BGI1350	Inosine	Purine nucleosides	0.00506333	1.77398	2.0854			BGI1350	Inosine 肌苷	Purine nucleosides	0.382152	0.564436	1.16525
BGI1357	Uridine	Pyrimidine nucleosides	0.701061	0.590434	1.04667			BGI1357	Uridine	Pyrimidine nucleosides	0.125581	0.70622	1.25714			BGI1357	Uridine 尿苷	Pyrimidine nucleosides	0.137387	0.743941	1.3158
BGI1362	Acyclovir	Imidazopyrimidines	0.00631964	2.29019	29.3723			BGI1362	Acyclovir	Imidazopyrimidines	0.089468	1.97525	0.158677			BGI1362	Acyclovir	Imidazopyrimidines	0.00646566	1.27451	4.6607
BGI1366	2-Hydroxyisobutyric acid	Hydroxy acids and derivatives	0.0239107	1.18657	0.451903			BGI1366	2-Hydroxyisobutyric acid	Hydroxy acids and derivatives	0.0113503	2.03831	2.47811			BGI1366	2-Hydroxyisobutyric acid	Hydroxy acids and derivatives	0.540052	0.269167	1.11987
BGI1371	Nicotinic acid	Pyridines and derivatives	0.134696	0.703945	0.799236			BGI1371	Nicotinic acid	Pyridines and derivatives	0.190457	0.705158	1.30167			BGI1371	Nicotinic acid 烟酸	Pyridines and derivatives	0.909383	0.286446	1.04034
BGI1373	2,2-Dimethylsuccinic acid	Fatty Acyls	0.781367	0.517884	0.929875			BGI1373	2,2-Dimethylsuccinic acid	Fatty Acyls	0.295819	0.498569	1.12158			BGI1373	2,2-Dimethylsuccinic acid	Fatty Acyls	0.592785	0.705404	1.04293
BGI1374	Glabridin	Isoflavonoids	0.312411	0.745543	1.22588			BGI1374	Glabridin	Isoflavonoids	0.302808	0.413051	1.17751			BGI1374	Glabridin 光甘草定	Isoflavonoids	0.157459	0.971788	1.44348
BGI1382	2-Oxobutyric acid	Keto acids and derivatives	0.0719178	0.709166	0.662871			BGI1382	2-Oxobutyric acid	Keto acids and derivatives	0.0777129	0.721151	1.26287			BGI1382	2-Oxobutyric acid	Keto acids and derivatives	0.478385	0.302708	0.837118
BGI1385	L-Tyrosine	Carboxylic acids and derivatives	0.939975	0.378577	1.02781			BGI1385	L-Tyrosine	Carboxylic acids and derivatives	0.963609	0.203882	0.991499			BGI1385	L-Tyrosine L-酪氨酸	Carboxylic acids and derivatives	0.896736	0.28078	1.01907
BGI1390	6-Aminocaproic acid	Fatty Acyls	0.0150944	0.921029	1.65598			BGI1390	6-Aminocaproic acid	Fatty Acyls	0.184669	0.437587	1.17896			BGI1390	6-Aminocaproic acid	Fatty Acyls	0.00368671	1.52407	1.95233
BGI1403	Phloretin	Linear 1,3-diarylpropanoids	0.351791	0.460111	0.835364			BGI1403	Phloretin	Linear 1,3-diarylpropanoids	0.746808	0.365183	0.951952			BGI1403	Phloretin 根皮素	Linear 1,3-diarylpropanoids	0.223042	0.485238	0.795226
BGI1404	Galactitol	Organooxygen compounds	0.0242976	0.78537	0.725397			BGI1404	Galactitol	Organooxygen compounds	0.22826	0.574559	1.21149			BGI1404	Galactitol	Organooxygen compounds	0.316289	0.778993	0.878809
BGI1409	(R)-Mandelic acid	Benzene and substituted derivatives	0.0889763	0.745876	1.41298			BGI1409	(R)-Mandelic acid	Benzene and substituted derivatives	0.883264	0.259187	0.990328			BGI1409	(R)-Mandelic acid 扁桃酸	Benzene and substituted derivatives	0.0513499	0.80665	1.39932
BGI1412	Verbascoside	Cinnamic acids and derivatives	0.45495	0.556736	1.09638			BGI1412	Verbascoside	Cinnamic acids and derivatives	0.0490286	0.687613	1.2795			BGI1412	Verbascoside 毛蕊花糖苷	Cinnamic acids and derivatives	0.108803	0.912285	1.40282
BGI1426	L-Leucine	Carboxylic acids and derivatives	0.0246883	0.768169	1.54569			BGI1426	L-Leucine	Carboxylic acids and derivatives	0.348921	0.43089	1.17261			BGI1426	L-Leucine L-亮氨酸	Carboxylic acids and derivatives	0.00677627	1.34674	1.81249
BGI1437	2-Aminoisobutyric acid	Carboxylic acids and derivatives	0.023377	0.432298	1.15631			BGI1437	2-Aminoisobutyric acid	Carboxylic acids and derivatives	0.019272	0.417169	0.907283			BGI1437	2-Aminoisobutyric acid	Carboxylic acids and derivatives	0.321646	0.219521	1.0491
BGI1439	L-homocystine	Carboxylic acids and derivatives	0.438246	0.774948	1.60015			BGI1439	L-homocystine	Carboxylic acids and derivatives	0.782017	0.461149	0.69755			BGI1439	L-homocystine	Carboxylic acids and derivatives	0.353296	0.371553	1.11619
BGI1443	Mulberrin	Flavonoids	0.347939	0.652936	0.610762			BGI1443	Mulberrin	Flavonoids	0.153231	1.3387	1.707			BGI1443	Mulberrin 桑黄酮	Flavonoids	0.699085	0.347168	1.04257
BGI1462	L-Phenylalanine	Carboxylic acids and derivatives	0.733315	0.19543	1.02612			BGI1462	L-Phenylalanine	Carboxylic acids and derivatives	0.502956	0.381734	1.09624			BGI1462	L-Phenylalanine L-苯丙氨酸	Carboxylic acids and derivatives	0.410484	0.489374	1.12487
BGI1464	Traumatic acid	Fatty Acyls	0.00300804	1.62996	3.4378			BGI1464	Traumatic acid	Fatty Acyls	0.36869	0.658756	0.810962			BGI1464	Traumatic acid	Fatty Acyls	0.0186212	1.46464	2.78792
BGI1470	Imidazole-4-acetic acid	Azoles	0.0963717	0.532676	0.767329			BGI1470	Imidazole-4-acetic acid	Azoles	0.0470498	0.695925	1.22842			BGI1470	Imidazole-4-acetic acid	Azoles	0.77144	0.213536	0.942598
BGI1481	Deoxyadenosine monophosphate	Purine nucleotides	0.573857	0.353759	0.788753			BGI1481	Deoxyadenosine monophosphate	Purine nucleotides	0.070596	0.871626	1.3784			BGI1481	Deoxyadenosine monophosphate	Purine nucleotides	0.523456	0.49433	1.08721
BGI1483	Cytidine	Pyrimidine nucleosides	0.0862857	0.541879	0.741738			BGI1483	Cytidine	Pyrimidine nucleosides	0.260907	0.455292	1.16672			BGI1483	Cytidine 胞苷	Pyrimidine nucleosides	0.427484	0.353075	0.8654
BGI1488	Orotic acid	Diazines	0.387393	0.452034	1.22418			BGI1488	Orotic acid	Diazines	0.0813965	1.03497	0.635287			BGI1488	Orotic acid	Diazines	0.564104	0.346429	0.777708
BGI1489	Glycyl-L-tyrosine	Carboxylic acids and derivatives	0.0262617	0.925641	0.628135			BGI1489	Glycyl-L-tyrosine	Carboxylic acids and derivatives	0.819991	0.556834	1.09187			BGI1489	Glycyl-L-tyrosine	Carboxylic acids and derivatives	0.0809505	0.919936	0.685845
BGI1493	Uracil	Diazines	0.525945	0.629118	0.827786			BGI1493	Uracil	Diazines	0.128051	1.29962	0.516692			BGI1493	Uracil	Diazines	0.0161438	1.17471	0.42771
BGI1499	Pyridoxal	Pyridines and derivatives	0.973898	0.539908	1.05431			BGI1499	Pyridoxal	Pyridines and derivatives	0.690766	0.454481	0.982057			BGI1499	Pyridoxal	Pyridines and derivatives	0.595292	0.67101	1.03539
BGI1510	5-Hydroxymethylfurfural	Organooxygen compounds	0.166834	0.520896	0.786189			BGI1510	5-Hydroxymethylfurfural	Organooxygen compounds	0.0920497	0.628529	1.18806			BGI1510	5-Hydroxymethylfurfural 5-羟甲基糠醛	Organooxygen compounds	0.772728	0.20128	0.934038
BGI1529	D-cycloserine	Azolines	0.644906	1.1165	0.615096			BGI1529	D-cycloserine	Azolines	0.0514987	0.60361	0.754657			BGI1529	D-cycloserine	Azolines	0.308073	1.52624	0.464186
BGI1537	D-Glutamic acid	Carboxylic acids and derivatives	0.234187	0.698408	0.817617			BGI1537	D-Glutamic acid	Carboxylic acids and derivatives	0.223413	1.15361	1.46598			BGI1537	D-Glutamic acid	Carboxylic acids and derivatives	0.676513	0.531545	1.19861
BGI1548	Hesperetin 5-O-glucoside	Flavonoids	0.875948	1.13758	0.928995			BGI1548	Hesperetin 5-O-glucoside	Flavonoids	0.0199103	1.7859	0.449492			BGI1548	Hesperetin 5-O-glucoside	Flavonoids	0.0786925	1.30313	0.417576
BGI1549	Salicylic acid	Benzene and substituted derivatives	0.792174	0.202523	0.931426			BGI1549	Salicylic acid	Benzene and substituted derivatives	0.521529	0.335834	1.11399			BGI1549	Salicylic acid 水杨酸	Benzene and substituted derivatives	0.580855	0.835938	1.0376
BGI1564	Cytosine	Diazines	0.0265879	0.427861	0.814438			BGI1564	Cytosine	Diazines	0.451645	0.246956	1.08765			BGI1564	Cytosine 胞嘧啶	Diazines	0.242998	0.423525	0.885823
BGI1566	Spermine	Organonitrogen compounds	0.292655	0.585187	0.583883			BGI1566	Spermine	Organonitrogen compounds	0.198633	0.944763	1.74799			BGI1566	Spermine	Organonitrogen compounds	0.878101	1.15316	1.02062
BGI1591	L-Tryptophan	Indoles and derivatives	0.0278243	1.22356	2.1614			BGI1591	L-Tryptophan	Indoles and derivatives	0.011828	1.08062	1.78386			BGI1591	L-Tryptophan L-色氨酸	Indoles and derivatives	0.00405463	2.16808	3.85563
BGI1592	Adenine	Imidazopyrimidines	0.00468746	1.08608	0.613682			BGI1592	Adenine	Imidazopyrimidines	0.000507547	1.39815	1.68579			BGI1592	Adenine 腺嘌呤	Imidazopyrimidines	0.719978	0.205835	1.03454
BGI1594	L-Isoleucine	Carboxylic acids and derivatives	0.00115021	1.19988	2.11527			BGI1594	L-Isoleucine	Carboxylic acids and derivatives	0.0916433	0.994055	0.710859			BGI1594	L-Isoleucine	Carboxylic acids and derivatives	0.0468488	0.748608	1.50366
BGI1600	p-Hydroxy-cinnamic acid	Cinnamic acids and derivatives	0.0520081	1.1736	0.522248			BGI1600	p-Hydroxy-cinnamic acid	Cinnamic acids and derivatives	0.675808	1.56062	0.903904			BGI1600	p-Hydroxy-cinnamic acid 对羟基肉桂酸	Cinnamic acids and derivatives	0.116379	1.72773	0.472062
BGI1605	8-Geranyloxypsoralen	Prenol lipids	0.906576	0.451009	1.16232			BGI1605	8-Geranyloxypsoralen	Prenol lipids	0.449264	1.40578	0.736573			BGI1605	8-Geranyloxypsoralen 8-香叶草氧基补骨脂素	Prenol lipids	0.502699	1.94842	0.856133
BGI1621	L-Arabitol	Organooxygen compounds	0.134992	0.71235	0.744993			BGI1621	L-Arabitol	Organooxygen compounds	0.206139	0.640021	1.24363			BGI1621	L-Arabitol	Organooxygen compounds	0.715657	0.356455	0.926499
BGI1630	Gibberellic acid	Prenol lipids	0.0132036	1.78723	0.113335			BGI1630	Gibberellic acid	Prenol lipids	0.457187	1.15737	1.65393			BGI1630	Gibberellic acid	Prenol lipids	0.053031	1.61357	0.187449
BGI1631	3-Indolecarboxylic acid	Indoles and derivatives	0.17033	1.00973	0.338229			BGI1631	3-Indolecarboxylic acid	Indoles and derivatives	0.0134678	1.90733	2.49187			BGI1631	3-Indolecarboxylic acid	Indoles and derivatives	0.668805	0.523045	0.842821
BGI1640	Tomatidin	Steroids and steroid derivatives	0.0248109	0.782222	0.646365			BGI1640	Tomatidin	Steroids and steroid derivatives	0.0340491	1.13188	1.47952			BGI1640	Tomatidin 番茄碱	Steroids and steroid derivatives	0.694181	0.382989	0.956309
BGI1645	α-Pinene	Prenol lipids	0.405296	0.553865	0.801935			BGI1645	α-Pinene	Prenol lipids	0.99139	0.167505	0.989012			BGI1645	α-Pinene	Prenol lipids	0.38386	0.482864	0.793123
BGI1646	(1R)-(+)-ALPHA-PINENE	Prenol lipids	0.0171566	1.82777	0.138425			BGI1646	(1R)-(+)-ALPHA-PINENE	Prenol lipids	0.387089	0.821846	1.95264			BGI1646	(1R)-(+)-ALPHA-PINENE	Prenol lipids	0.0645988	1.66462	0.270294
BGI1649	Triethyl citrate	Carboxylic acids and derivatives	0.000100568	1.71357	3.99281			BGI1649	Triethyl citrate	Carboxylic acids and derivatives	0.135647	0.832412	0.674117			BGI1649	Triethyl citrate	Carboxylic acids and derivatives	0.00304446	1.36702	2.69162
BGI1665	Sertraline	Tetralins	0.0020321	1.37627	2.50257			BGI1665	Sertraline	Tetralins	0.21448	0.46711	0.794719			BGI1665	Sertraline	Tetralins	0.0071338	1.27193	1.98884
BGI1681	Hydroxymalonic acid	Carboxylic acids and derivatives	0.289088	0.656831	0.637697			BGI1681	Hydroxymalonic acid	Carboxylic acids and derivatives	0.00316559	0.897991	0.699165			BGI1681	Hydroxymalonic acid	Carboxylic acids and derivatives	0.0480948	1.22322	0.445855
BGI1699	Deoxycholic acid	Steroids and steroid derivatives	0.0209312	0.935964	0.652011			BGI1699	Deoxycholic acid 去氧胆酸	Steroids and steroid derivatives	0.0711546	0.92569	1.33863			BGI1699	Deoxycholic acid 去氧胆酸	Steroids and steroid derivatives	0.272042	0.51656	0.872799
BGI1726	Benztropine	Benzene and substituted derivatives	0.162865	0.992707	1.46439			BGI1726	Benztropine	Benzene and substituted derivatives	0.847239	0.254011	0.918593			BGI1726	Benztropine	Benzene and substituted derivatives	0.144266	0.689681	1.34518
BGI1750	Phthalic acid	Benzene and substituted derivatives	0.00443798	1.06945	0.400246			BGI1750	Phthalic acid	Benzene and substituted derivatives	0.316223	0.76545	0.839273			BGI1750	Phthalic acid	Benzene and substituted derivatives	0.00786168	1.68421	0.335916
BGI1752	5-Aminosalicylic acid	Benzene and substituted derivatives	0.514554	0.336368	0.992793			BGI1752	5-Aminosalicylic acid	Benzene and substituted derivatives	0.959227	0.286719	1.13484			BGI1752	5-Aminosalicylic acid	Benzene and substituted derivatives	0.62992	0.756729	1.12666
BGI1762	2-Phenylbutyric acid	Benzene and substituted derivatives	0.0117484	0.918743	1.62291			BGI1762	2-Phenylbutyric acid	Benzene and substituted derivatives	0.00307188	1.34784	0.619061			BGI1762	2-Phenylbutyric acid	Benzene and substituted derivatives	0.874132	0.0532315	1.00468
BGI1773	Scopoletin	Coumarins and derivatives	0.874142	0.531676	1.12865			BGI1773	Scopoletin	Coumarins and derivatives	0.830585	0.347178	0.757277			BGI1773	Scopoletin 东莨菪内酯	Coumarins and derivatives	0.981857	0.234315	0.854703
BGI1776	Methyl eugenol	Benzene and substituted derivatives	0.301985	0.874944	0.584427			BGI1776	Methyl eugenol	Benzene and substituted derivatives	0.00838814	0.829179	0.695866			BGI1776	Methyl eugenol 甲基丁香酚	Benzene and substituted derivatives	0.0685602	1.35334	0.406683
BGI1785	D-(-)-Synephrine	Phenols	0.120792	0.80695	0.658407			BGI1785	D-(-)-Synephrine	Phenols	0.18288	0.831035	1.24419			BGI1785	D-(-)-Synephrine	Phenols	0.489194	0.552393	0.819181
BGI1806	Epigallocatechin	Flavonoids	0.012853	1.23275	0.409644			BGI1806	Epigallocatechin	Flavonoids	0.871383	0.435932	1.00914			BGI1806	Epigallocatechin (-)-表没食子儿茶素	Flavonoids	0.0138641	1.28285	0.413387
BGI1822	(-)-Epigallocatechin gallate	Flavonoids	0.0208504	1.28626	0.345545			BGI1822	(-)-Epigallocatechin gallate	Flavonoids	0.905234	1.15383	1.29975			BGI1822	(-)-Epigallocatechin gallate 表没食子儿茶素没食子酸酯	Flavonoids	0.0994023	1.52135	0.449122
BGI1823	2-Picolinic acid	Pyridines and derivatives	0.747795	0.473459	0.997091			BGI1823	2-Picolinic acid	Pyridines and derivatives	0.581846	0.384247	0.851598			BGI1823	2-Picolinic acid	Pyridines and derivatives	0.251816	0.433085	0.849121
BGI1828	N-Acetyl-L-aspartic acid	Carboxylic acids and derivatives	0.846089	0.30216	0.676781			BGI1828	N-Acetyl-L-aspartic acid	Carboxylic acids and derivatives	0.00225701	2.03316	3.14567			BGI1828	N-Acetyl-L-aspartic acid	Carboxylic acids and derivatives	0.0658888	1.43056	2.12893
BGI0173	Huperzine B	NA	0.534663	0.438689	0.913548			BGI0173	Huperzine B 石杉碱乙	NA	0.813117	0.248521	0.962527			BGI0173	Huperzine B 石杉碱乙	NA	0.358036	0.391746	0.879315
BGI0199	trans,trans-Farnesol	NA	0.480562	0.589487	0.792747			BGI0199	trans,trans-Farnesol	NA	0.783329	0.198596	0.964202			BGI0199	trans,trans-Farnesol	NA	0.390927	0.580031	0.764368
BGI0310	Topotecan	Benzopyrans	0.48804	0.513999	0.657411			BGI0310	Topotecan	Benzopyrans	0.0690118	0.821803	1.40507			BGI0310	Topotecan 拓扑替康	Benzopyrans	0.75935	0.590999	0.923706
BGI0332	Aurantio-obtusin β-D-glucoside	NA	0.0135335	1.34192	0.338796			BGI0332	Aurantio-obtusin β-D-glucoside	NA	0.951819	0.481566	0.932194			BGI0332	Aurantio-obtusin β-D-glucoside 橙黄决明素-6-O-葡萄糖苷	NA	0.00887504	1.47334	0.315824
BGI0364	Linderane	NA	0.448348	0.802994	0.824146			BGI0364	Linderane	NA	0.739453	0.342981	1.00923			BGI0364	Linderane 乌药醚内酯	NA	0.51266	0.487463	0.831753
BGI0403	Aloin	NA	0.204941	0.851749	0.570712			BGI0403	Aloin	NA	0.293623	0.655039	0.858935			BGI0403	Aloin 芦荟苷	NA	0.0962075	1.3175	0.490205
BGI0405	Sweroside	NA	0.0530047	1.09102	0.472545			BGI0405	Sweroside	NA	0.579399	0.919908	0.696153			BGI0405	Sweroside 獐芽菜苷	NA	0.00516006	1.60297	0.328963
BGI0437	3-Methyl-2-oxindole	NA	0.268897	0.959456	0.327298			BGI0437	3-Methyl-2-oxindole	NA	0.510124	1.0588	1.18195			BGI0437	3-Methyl-2-oxindole	NA	0.495092	0.877447	0.38685
BGI0496	Swertiamarin	NA	0.00574427	1.49647	0.317667			BGI0496	Swertiamarin	NA	0.00372014	2.16508	2.79934			BGI0496	Swertiamarin 獐牙菜苦甙	NA	0.944158	0.37706	0.889258
BGI0521	Isoguanosine	NA	0.578322	0.80805	0.710631			BGI0521	Isoguanosine	NA	0.745337	0.233756	0.997291			BGI0521	Isoguanosine 巴豆苷	NA	0.493983	1.52319	0.708706
BGI0527	quercetin-3-O-sophoroside	NA	0.0261503	2.0333	0.0693095			BGI0527	quercetin-3-O-sophoroside	NA	0.0628169	1.51534	2.00841			BGI0527	quercetin-3-O-sophoroside	NA	0.144394	1.32213	0.139202
BGI0557	10-Hydroxycamptothecin	NA	0.133713	0.589823	0.73373			BGI0557	10-Hydroxycamptothecin	NA	0.886892	0.125535	0.968893			BGI0557	10-Hydroxycamptothecin 羟基喜树碱	NA	0.094762	0.78274	0.710906
BGI0563	kaempferol 3-O-sophoroside	NA	0.0874214	1.17219	0.604218			BGI0563	kaempferol 3-O-sophoroside	NA	0.230106	1.05062	1.43154			BGI0563	kaempferol 3-O-sophoroside	NA	0.422044	0.457268	0.864961
BGI0600	Gentiopicrin	NA	0.0429371	1.3227	3.41698			BGI0600	Gentiopicrin	NA	0.0746026	1.44864	0.352672			BGI0600	Gentiopicrin 龙胆苦苷	NA	0.461983	0.849075	1.20507
BGI0668	Catalpol	NA	0.324278	0.687679	0.658055			BGI0668	Catalpol	NA	0.0567176	0.965233	1.52963			BGI0668	Catalpol 梓醇	NA	0.713259	0.726658	1.00658
BGI0700	Byakangelicol	NA	0.985655	0.160368	0.875057			BGI0700	Byakangelicol	NA	0.529022	0.475756	0.853151			BGI0700	Byakangelicol 白当归脑	NA	0.672306	0.416268	0.746556
BGI0859	Jatrorrhizine	NA	0.562889	0.743398	0.815516			BGI0859	Jatrorrhizine	NA	0.433646	0.567478	1.36302			BGI0859	Jatrorrhizine 药根碱	NA	0.82426	0.775243	1.11156
BGI0862	Vitexin	NA	0.617298	0.450869	0.689635			BGI0862	Vitexin	NA	0.0701004	0.931678	1.51642			BGI0862	Vitexin 牡荆素	NA	0.543814	0.570375	1.04577
BGI0922	Homoorientin	NA	0.0618404	0.977893	0.44069			BGI0922	Homoorientin	NA	0.109619	0.957452	1.58285			BGI0922	Homoorientin 异荭草素	NA	0.462421	0.958017	0.697548
BGI0947	Ferulaldehyde	Phenols	0.0369588	0.793387	0.624687			BGI0947	Ferulaldehyde	Phenols	0.749847	0.485428	1.08811			BGI0947	Ferulaldehyde 松柏醛	Phenols	0.0840473	0.752377	0.679731
BGI0955	Asiatic acid	NA	0.235471	0.706954	1.62113			BGI0955	Asiatic acid	NA	0.704184	0.31832	1.00788			BGI0955	Asiatic acid 积雪草酸	NA	0.0370013	0.887032	1.6339
BGI0956	Gamabufotalin	NA	0.935253	0.243534	0.86252			BGI0956	Gamabufotalin	NA	0.161649	1.00982	1.53746			BGI0956	Gamabufotalin 和蟾蜍他灵	NA	0.270166	0.745169	1.32609
BGI0958	Bufalin	NA	0.00417588	1.06502	0.4266			BGI0958	Bufalin	NA	0.0945411	1.42276	2.95051			BGI0958	Bufalin 蟾毒灵	NA	0.788954	0.751481	1.25869
BGI0986	Lycorine	NA	0.10086	0.562983	0.804378			BGI0986	Lycorine	NA	0.165687	0.917241	1.27138			BGI0986	Lycorine 石蒜碱	NA	0.977512	0.363748	1.02267
BGI1007	Taxifolin	NA	0.34879	1.06735	0.966242			BGI1007	Taxifolin	NA	0.0440758	1.63888	2.97468			BGI1007	Taxifolin 二氢槲皮素	NA	0.0330743	1.78034	2.87426
BGI1017	Orsellinic acid	NA	0.0369841	1.08375	0.513563			BGI1017	Orsellinic acid	NA	0.960012	0.863819	1.10164			BGI1017	Orsellinic acid 苔色酸	NA	0.100228	1.14806	0.565762
BGI1034	Osthole	NA	0.00112812	1.7999	5.73561			BGI1034	Osthole	NA	0.0273916	1.79472	0.343258			BGI1034	Osthole 蛇床子素	NA	0.117258	0.751523	1.96879
BGI1049	4-Quinolinecarboxylic acid	NA	0.321222	0.959998	4.60489			BGI1049	4-Quinolinecarboxylic acid	NA	0.167166	1.76241	0.104791			BGI1049	4-Quinolinecarboxylic acid	NA	0.629188	0.642029	0.482551
BGI1072	Baicalein	Flavonoids	0.164381	1.34126	2.03945			BGI1072	Baicalein	Flavonoids	0.684034	0.756502	0.688852			BGI1072	Baicalein 黄芩素	Flavonoids	0.18344	1.23656	1.40488
BGI1088	Apocynin	NA	0.0652978	0.810729	0.607982			BGI1088	Apocynin	NA	0.991924	0.664696	1.21741			BGI1088	Apocynin	NA	0.224959	0.813865	0.740165
BGI1154	Evodiamine	NA	0.0778064	0.828132	0.540513			BGI1154	Evodiamine	NA	0.157797	0.516444	1.20206			BGI1154	Evodiamine 吴茱萸碱	NA	0.233576	0.689319	0.649731
BGI1159	Matrine	NA	0.0958201	0.764521	0.610627			BGI1159	Matrine	NA	0.170366	0.952385	1.4443			BGI1159	Matrine 苦参碱	NA	0.701038	0.49776	0.881927
BGI1212	Scutellarein	Flavonoids	0.0316176	0.82106	0.601281			BGI1212	Scutellarein	Flavonoids	0.29776	0.440217	1.1503			BGI1212	Scutellarein 高黄芩素	Flavonoids	0.10839	0.804074	0.691656
BGI1295	Maleamic Acid	NA	0.00164407	2.1229	6.38575			BGI1295	Maleamic Acid	NA	0.117108	0.968662	0.497604			BGI1295	Maleamic Acid	NA	0.00876473	1.73379	3.17757
BGI1310	5-Hydroxytryptophan	NA	0.774614	1.06086	0.76271			BGI1310	5-Hydroxytryptophan	NA	0.0760262	0.658321	0.784828			BGI1310	5-Hydroxytryptophan 5-羟基色氨酸	NA	0.32706	1.38635	0.598596
BGI1397	3-n-Butylphathlide	Benzofurans	0.496602	0.584182	0.870212			BGI1397	3-n-Butylphathlide	Benzofurans	0.424617	0.448526	1.0903			BGI1397	3-n-Butylphathlide 正丁基苯酞	Benzofurans	0.931935	0.356078	0.948792
BGI1415	Schisandrin C	NA	0.934022	1.54939	0.611347			BGI1415	Schisandrin C	NA	0.112355	0.984687	0.578719			BGI1415	Schisandrin C 五味子丙素	NA	0.441812	1.85914	0.353798
BGI1452	Lithosprmoside	NA	0.872811	0.287071	0.849077			BGI1452	Lithosprmoside	NA	0.271435	0.688013	1.38678			BGI1452	Lithosprmoside 紫草氰苷	NA	0.507053	0.649673	1.17749
BGI1485	Metformin	Organonitrogen compounds	0.744248	0.136074	0.968012			BGI1485	Metformin	Organonitrogen compounds	0.559825	0.491439	0.920778			BGI1485	Metformin	Organonitrogen compounds	0.387629	0.436767	0.891325
BGI1541	Germacrone	NA	0.0645806	0.774132	1.43579			BGI1541	Germacrone	NA	0.0191939	0.713437	1.28457			BGI1541	Germacrone 吉马酮	NA	0.0103403	1.28782	1.84437
BGI1624	Danshensu	NA	0.0222107	1.5195	2.80507			BGI1624	Danshensu	NA	0.0139733	1.18997	0.539263			BGI1624	Danshensu 丹参素	NA	0.189093	1.0329	1.51267
BGI1687	Purpurin	NA	0.0255269	1.14681	2.0008			BGI1687	Purpurin	NA	0.2363	0.403666	1.13448			BGI1687	Purpurin 羟基茜草素	NA	0.0134857	1.52227	2.26988
BGI1707	Sudan I	NA	0.00122822	1.67454	0.39766			BGI1707	Sudan I	NA	0.00440767	1.73754	2.18889			BGI1707	Sudan I 苏丹红I	NA	0.402761	0.375073	0.870432
BGI0158	Protosappanin B	NA	0.232239	0.799123	1.81175			BGI0158	Protosappanin B	NA	0.392806	0.825053	0.637513			BGI0158	Protosappanin B 原苏木素B	NA	0.627059	0.514217	1.15502
BGI0164	Ethyl caffeate	NA	0.114206	1.11092	2.11724			BGI0164	Ethyl caffeate	NA	0.112132	1.37501	0.476597			BGI0164	Ethyl caffeate 咖啡酸乙酯	NA	0.833554	0.559839	1.00907
BGI0204	Epigoitrin	NA	0.0308124	1.06879	1.8736			BGI0204	Epigoitrin	NA	0.027557	0.998838	0.657168			BGI0204	Epigoitrin 表告依春	NA	0.299325	0.650122	1.23127
BGI0255	Epimagnolin B	NA	0.114097	1.05761	1.77979			BGI0255	Epimagnolin B	NA	0.776865	0.175432	1.00671			BGI0255	Epimagnolin B 表木兰脂素B	NA	0.0506652	1.07924	1.79173
BGI0256	Ferulic acid	NA	0.00565581	1.5201	0.310522			BGI0256	Ferulic acid	NA	0.594884	0.792446	1.27694			BGI0256	Ferulic acid 阿魏酸	NA	0.022484	1.47913	0.396518
BGI0257	Baohuoside	NA	0.0520201	1.249	1.8141			BGI0257	Baohuoside I	NA	0.196998	0.680459	0.729291			BGI0257	Baohuoside I 宝藿苷I	NA	0.193891	0.645762	1.32301
BGI0288	Scutellarin methyl ester	NA	0.0148924	1.856	4.6116			BGI0288	Scutellarin methyl ester	NA	0.213603	1.17369	0.588697			BGI0288	Scutellarin methyl ester 灯盏花乙素甲酯	NA	0.148245	1.0182	2.71483
BGI0296	alpha-Methylcinnamic acid	NA	0.436764	0.738607	0.836396			BGI0296	alpha-Methylcinnamic acid	NA	0.531398	0.478834	1.06683			BGI0296	alpha-Methylcinnamic acid	NA	0.701901	0.461844	0.892291
BGI0349	(2R,3S)-3-Phenylisoserine hydrochloride	NA	0.0102289	0.871741	0.58001			BGI0349	(2R,3S)-3-Phenylisoserine hydrochloride	NA	0.397658	0.834002	1.51764			BGI0349	(2R,3S)-3-Phenylisoserine hydrochloride	NA	0.393151	0.695174	0.880248
BGI0357	Oxypeucedan hydrate	NA	0.243828	0.873613	4.24812			BGI0357	Oxypeucedan hydrate	NA	0.0962032	1.88951	0.128099			BGI0357	Oxypeucedan hydrate 水合氧化前胡素	NA	0.348357	0.469441	0.544182
BGI0359	DL-Tartaric acid	NA	0.250791	0.807664	0.53736			BGI0359	DL-Tartaric acid	NA	0.123634	0.739895	0.756237			BGI0359	DL-Tartaric acid	NA	0.0731644	1.37231	0.406372
BGI0373	Lobetyolin	NA	0.00907861	2.32659	7.18318			BGI0373	Lobetyolin	NA	0.466249	0.77211	0.555004			BGI0373	Lobetyolin 党参炔苷	NA	0.0173348	2.23654	3.98669
BGI0380	Diacerein	NA	0.220523	0.969288	1.30023			BGI0380	Diacerein	NA	0.40038	0.396239	1.17512			BGI0380	Diacerein 双醋瑞因	NA	0.126145	1.13286	1.52792
BGI0383	Taxifolin 7-rhamnoside	NA	0.00448631	1.53859	0.274964			BGI0383	Taxifolin 7-rhamnoside	NA	0.897968	0.603635	1.13406			BGI0383	Taxifolin 7-rhamnoside 二氢田基黄苷	NA	0.0179589	1.67707	0.311825
BGI0413	Abscisic acid	NA	0.253133	0.521503	0.805222			BGI0413	Abscisic acid	NA	0.707596	0.202083	0.983646			BGI0413	Abscisic acid 脱落酸	NA	0.253897	0.673546	0.792054
BGI0424	Lactose	NA	0.402583	0.443936	0.734555			BGI0424	Lactose	NA	0.182242	0.793789	1.48688			BGI0424	Lactose 乳糖	NA	0.719185	0.698951	1.09219
BGI0510	D-Histidine methyl ester	NA	0.607295	0.832561	0.556142			BGI0510	D-Histidine methyl ester	NA	0.709067	0.358456	1.41232			BGI0510	D-Histidine methyl ester	NA	0.838524	1.6686	0.785452
BGI0517	Phytolaccagenin	NA	0.706232	0.696712	1.06488			BGI0517	Phytolaccagenin	NA	0.856796	0.369781	0.911825			BGI0517	Phytolaccagenin 商陆皂苷元	NA	0.764585	0.158456	0.970981
BGI0532	(+)-Corynoline	NA	0.0174945	1.20881	0.432495			BGI0532	(+)-Corynoline	NA	0.00742646	1.75086	2.06833			BGI0532	(+)-Corynoline 紫堇灵	NA	0.975816	0.566519	0.894544
BGI0533	Acetylcorynoline	NA	0.0360333	1.04413	0.533697			BGI0533	Acetylcorynoline	NA	0.0121284	1.54809	1.87001			BGI0533	Acetylcorynoline 乙酰紫堇灵	NA	0.824941	0.461451	0.998018
BGI0560	Bavachinin	NA	0.937941	0.279892	1.01239			BGI0560	Bavachinin	NA	0.248556	1.84578	0.488025			BGI0560	Bavachinin 甲基补骨脂黄酮A	NA	0.228411	2.39323	0.494074
BGI0561	Bavachin	NA	0.87109	0.487331	1.01981			BGI0561	Bavachin	NA	0.085125	1.20583	1.4879			BGI0561	Bavachin 补骨脂甲素	NA	0.07569	0.955967	1.51738
BGI0580	Rosmarinic acid	NA	0.428062	0.876808	1.30254			BGI0580	Rosmarinic acid	NA	0.0438444	1.81094	0.349768			BGI0580	Rosmarinic acid 迷迭香酸	NA	0.249878	1.08453	0.455589
BGI0598	4'-O-Methylbroussochalcone B	NA	0.896478	0.457006	1.16093			BGI0598	4'-O-Methylbroussochalcone	NA	0.449222	1.40738	0.736759			BGI0598	4'-O-Methylbroussochalcone B 4'-O-甲基补骨脂查耳酮B	NA	0.511815	1.9251	0.855326
BGI0620	Lycorine chloride	NA	0.0638489	0.584878	0.78458			BGI0620	Lycorine chloride	NA	0.0899559	1.03682	1.36199			BGI0620	Lycorine chloride 盐酸石蒜碱	NA	0.778281	0.407252	1.06859
BGI0622	Butin	NA	0.726061	0.826193	1.08147			BGI0622	Butin	NA	0.827228	0.50363	0.848099			BGI0622	Butin	NA	0.87832	0.689251	0.91719
BGI0629	Dehydroglaucine	NA	0.0514042	0.967849	1.57937			BGI0629	Dehydroglaucine	NA	0.907908	0.074914	1.00006			BGI0629	Dehydroglaucine 脱氢海罂粟碱	NA	0.0384411	0.980087	1.57947
BGI0632	4-Methoxysalicylic acid	NA	0.0483559	1.79293	0.044927			BGI0632	4-Methoxysalicylic acid	NA	0.0420401	0.869171	0.557171			BGI0632	4-Methoxysalicylic acid 4-甲氧基水杨酸	NA	0.017278	2.49652	0.025032
BGI0662	Nardosinone	NA	0.125138	0.494605	0.746343			BGI0662	Nardosinone	NA	0.950966	0.141031	1.01677			BGI0662	Nardosinone 甘松新酮	NA	0.171587	0.771112	0.758859
BGI0666	Sibiricose A6	NA	0.186958	0.778557	1.57508			BGI0666	Sibiricose A6	NA	0.482881	0.799131	0.768446			BGI0666	Sibiricose A6 西伯利亚远志糖A6	NA	0.40127	0.419183	1.21037
BGI0687	Aristolone	NA	0.00577536	1.17792	2.3158			BGI0687	Aristolone	NA	0.787082	0.437108	0.934207			BGI0687	Aristolone 马兜铃酮	NA	0.00976675	1.22888	2.16344
BGI0694	7-Methoxy-4-methylcoumarin	NA	0.0672058	0.824519	1.68289			BGI0694	7-Methoxy-4-methylcoumarin	NA	0.0316342	1.1597	1.63699			BGI0694	7-Methoxy-4-methylcoumarin 7-甲氧基-4-甲基香豆素	NA	0.00332056	1.66328	2.75487
BGI0703	N-(2-Acetamido)-2-Iminodiacetic acid	NA	0.627203	1.19785	0.420761			BGI0703	N-(2-Acetamido)-2-Iminodiacetic acid	NA	0.0957605	1.09152	0.609548			BGI0703	N-(2-Acetamido)-2-Iminodiacetic acid	NA	0.215242	1.92035	0.256474
BGI0704	Oxypeucedanin hydrate	NA	0.324033	0.729655	0.491095			BGI0704	Oxypeucedanin hydrate	NA	0.0768793	1.45633	1.78291			BGI0704	Oxypeucedanin hydrate 水合氧化前胡素	NA	0.684284	0.493801	0.875577
BGI0707	Alisol C 23-acetate	NA	0.000757906	1.54044	0.297236			BGI0707	Alisol C 23-acetate	NA	0.000537919	2.03943	2.80401			BGI0707	Alisol C 23-acetate 泽泻醇C-23-醋酸酯	NA	0.566747	0.420028	0.833452
BGI0710	Dehydrodiisoeugenol	NA	0.0650562	0.589359	0.773587			BGI0710	Dehydrodiisoeugenol	NA	0.679417	0.186636	0.971831			BGI0710	Dehydrodiisoeugenol 去氢二异丁香酚	NA	0.0439688	0.712721	0.751795
BGI0731	5-Hydroxy-1-tetralone	NA	0.245988	0.664861	0.584832			BGI0731	5-Hydroxy-1-tetralone	NA	0.0823958	0.876097	0.717578			BGI0731	5-Hydroxy-1-tetralone 5-羟基-四氢萘酮	NA	0.0496986	1.37662	0.419663
BGI0737	Fraxinellone	NA	0.891296	0.496446	1.02928			BGI0737	Fraxinellone	NA	0.0943895	1.21511	1.48917			BGI0737	Fraxinellone 梣酮	NA	0.0731837	0.932361	1.53278
BGI0742	Pectolinarin	NA	0.0444348	1.26604	3.06518			BGI0742	Pectolinarin	NA	0.0943624	1.46631	0.385575			BGI0742	Pectolinarin 大蓟苷	NA	0.387497	0.328476	1.18186
BGI0753	Fisetinidin chloride	NA	0.00473323	1.37039	0.381834			BGI0753	Fisetinidin chloride	NA	0.319321	0.625073	1.17923			BGI0753	Fisetinidin chloride	NA	0.0049287	1.14468	0.450268
BGI0757	Apigenin 7-O-glucuronide	NA	0.119729	1.27433	8.17282			BGI0757	Apigenin 7-O-glucuronide	NA	0.303364	1.21644	0.18671			BGI0757	Apigenin 7-O-glucuronide 芹菜素-7-O-葡萄糖醛酸苷	NA	0.261868	0.604867	1.52594
BGI0760	Shanzhiside	NA	0.406824	0.67035	0.220956			BGI0760	Shanzhiside	NA	0.032678	1.75841	3.60111			BGI0760	Shanzhiside 山栀苷	NA	0.447596	1.15795	0.795688
BGI0766	Sparteine sulfate	NA	0.748138	0.81094	1.18775			BGI0766	Sparteine sulfate	NA	0.5021	0.701407	1.01988			BGI0766	Sparteine sulfate 硫酸司巴丁	NA	0.329396	0.635847	1.21136
BGI0783	L-Alanyl-L-phenylalanine	NA	0.840875	0.344084	1.03622			BGI0783	L-Alanyl-L-phenylalanine	NA	0.846723	0.406274	0.901564			BGI0783	L-Alanyl-L-phenylalanine	NA	0.549774	0.270002	0.934215
BGI0795	Isobavachin	NA	0.129105	1.0128	1.55351			BGI0795	Isobavachin	NA	0.630927	0.332811	0.851528			BGI0795	Isobavachin 异补骨脂二氢黄酮	NA	0.158682	0.641321	1.32286
BGI0806	Isorhapontigenin	NA	0.481077	0.843368	1.07073			BGI0806	Isorhapontigenin	NA	0.356319	0.619694	1.21116			BGI0806	Isorhapontigenin 异丹叶大黄素	NA	0.199146	1.05863	1.29681
BGI0826	Gallocatechin	NA	0.210841	0.425707	0.854759			BGI0826	Gallocatechin	NA	0.0608844	1.10037	1.43946			BGI0826	(-)-Gallocatechin 没食子儿茶素	NA	0.207408	0.44411	1.23039
BGI0879	Aloenin	NA	0.508212	0.710093	0.859132			BGI0879	Aloenin	NA	0.19803	1.12999	1.26091			BGI0879	Aloenin 芦荟宁	NA	0.491902	0.386721	1.08329
BGI0882	4'-O-Glucosylvitexin	NA	0.0254828	1.37765	2.2682			BGI0882	4'-O-Glucosylvitexin	NA	0.0456345	0.934688	0.654085			BGI0882	4'-O-Glucosylvitexin 牡荆素葡萄糖苷	NA	0.170168	0.866017	1.4836
BGI0889	9-Methoxycamptothecin	NA	0.0146562	1.3035	0.406895			BGI0889	9-Methoxycamptothecin	NA	0.0151157	1.69633	2.08271			BGI0889	9-Methoxycamptothecin 9-甲氧基喜树碱	NA	0.695334	0.680415	0.847446
BGI0893	Ethyl 3,4-dihydroxybenzoate	NA	0.178777	1.06072	1.44385			BGI0893	Ethyl 3,4-dihydroxybenzoate	NA	0.232879	0.662734	0.708479			BGI0893	Ethyl 3,4-dihydroxybenzoate 3,4-二羟基苯甲酸乙酯	NA	0.416823	0.665282	1.02294
BGI0903	trans-Nerolidol	NA	0.230354	0.641897	0.727144			BGI0903	trans-Nerolidol	NA	0.68374	0.202971	1.03854			BGI0903	trans-Nerolidol	NA	0.30255	0.543578	0.75517
BGI0908	Neobavaisoflavone	NA	0.262575	0.556344	1.18745			BGI0908	Neobavaisoflavone	NA	0.934573	0.184115	0.988009			BGI0908	Neobavaisoflavone 新补骨脂异黄酮	NA	0.27981	0.53106	1.17321
BGI0971	α-Boswellic acid	NA	0.290707	0.676993	0.477608			BGI0971	α-Boswellic acid	NA	0.546156	0.643755	1.53584			BGI0971	α-Boswellic acid α-乳香酸	NA	0.662992	0.322706	0.733527
BGI0984	Aristolochic acid	NA	0.0696377	0.946754	2.11042			BGI0984	Aristolochic acid B	NA	0.535394	0.686854	0.715768			BGI0984	Aristolochic acid B 马兜铃酸B	NA	0.0438367	0.784226	1.51057
BGI0985	Nuciferine	NA	0.533497	0.421856	0.844417			BGI0985	Nuciferine	NA	0.478643	0.70391	1.01489			BGI0985	Nuciferine 荷叶碱	NA	0.972753	0.794749	0.856988
BGI1098	p-Coumaric acid	NA	0.0520081	1.1736	0.522248			BGI1098	p-Coumaric acid	NA	0.675808	1.56062	0.903904			BGI1098	p-Coumaric acid 对羟基肉桂酸	NA	0.116379	1.72773	0.472062
BGI1124	Hastatoside	NA	0.0651261	1.42926	2.94563			BGI1124	Hastatoside	NA	0.00357721	2.87434	0.137276			BGI1124	Hastatoside 5-羟基马鞭草苷	NA	0.114321	1.06711	0.404363
BGI1146	(±)-α-Bisabolol	NA	0.269477	0.597463	0.748426			BGI1146	(±)-α-Bisabolol	NA	0.735915	0.1845	1.0272			BGI1146	(±)-α-Bisabolol	NA	0.32943	0.499454	0.768787
BGI1179	Luteolin 3',7-di-O-glucoside	NA	0.0251685	1.32261	0.385797			BGI1179	Luteolin 3',7-di-O-glucoside	NA	0.312798	0.910725	1.27987			BGI1179	Luteolin 3',7-di-O-glucoside	NA	0.0507215	0.957831	0.493768
BGI1185	Tetrahydroberberine THB	NA	0.125139	1.04963	2.9707			BGI1185	Tetrahydroberberine THB	NA	0.322142	1.1465	0.607612			BGI1185	Tetrahydroberberine THB 四氢小檗碱	NA	0.817433	0.222192	1.80504
BGI1192	Isobutyrylshikonin	NA	0.247679	0.624325	0.642556			BGI1192	Isobutyrylshikonin	NA	0.173211	0.874518	1.52795			BGI1192	Isobutyrylshikonin 异丁酰紫草素	NA	0.940029	0.924755	0.981791
BGI1211	Ajugol	NA	0.480338	0.638012	1.25077			BGI1211	Ajugol	NA	0.622569	0.573025	0.849315			BGI1211	Ajugol 益母草苷	NA	0.834037	0.78696	1.0623
BGI1215	Tropic acid	NA	0.26265	0.575555	0.782723			BGI1215	Tropic acid	NA	0.308964	1.03658	1.75717			BGI1215	Tropic acid	NA	0.794495	0.648978	1.37538
BGI1246	D-Glucose 6-phosphate	NA	0.135626	0.63512	1.51295			BGI1246	D-Glucose 6-phosphate	NA	0.767414	0.53391	0.892107			BGI1246	D-Glucose 6-phosphate	NA	0.118961	0.71595	1.34971
BGI1280	Di-O-methylquercetin	NA	0.26215	0.487317	0.777126			BGI1280	Di-O-methylquercetin	NA	0.831891	0.290304	1.00175			BGI1280	Di-O-methylquercetin	NA	0.267086	0.491326	0.778486
BGI1313	Tanshinone IIA	NA	0.595286	0.321072	1.41968			BGI1313	Tanshinone IIA	NA	0.430609	0.893709	1.09096			BGI1313	Tanshinone IIA 丹参酮IIA	NA	0.13213	1.02772	1.5488
BGI1323	8-O-Acetyl shanzhiside methyl ester	NA	0.0379417	0.651863	0.739791			BGI1323	8-O-Acetyl shanzhiside methyl ester	NA	0.493481	0.285634	1.0538			BGI1323	8-O-Acetyl shanzhiside methyl ester 8-O-乙酰山栀苷甲酯	NA	0.0789615	0.654398	0.779588
BGI1343	Schisandrol B	NA	0.0281997	1.0449	0.491486			BGI1343	Schisandrol B	NA	0.0157837	1.83126	2.35255			BGI1343	Schisandrol B 五味子醇乙	NA	0.47276	0.564883	1.15625
BGI1387	Thiocolchicoside	NA	0.00350547	1.33806	2.03544			BGI1387	Thiocolchicoside	NA	0.0555004	0.942585	0.670154			BGI1387	Thiocolchicoside 硫秋水仙苷	NA	0.0224582	0.804464	1.36406
BGI1395	Narcissoside	NA	0.00883087	1.55515	3.74247			BGI1395	Narcissoside	NA	0.128379	1.1549	0.50716			BGI1395	Narcissoside 水仙苷	NA	0.0678208	0.970588	1.89803
BGI1417	Trigonelline HCl	NA	0.184491	0.995917	1.18404			BGI1417	Trigonelline HCl	NA	0.0817772	1.18759	0.524886			BGI1417	Trigonelline HCl 盐酸胡芦巴碱	NA	0.747412	0.32152	0.621486
BGI1466	Picroside III	NA	0.442234	0.385388	1.31384			BGI1466	Picroside III	NA	0.722562	0.556704	0.900478			BGI1466	Picroside III 胡黄连苷III	NA	0.718475	0.324916	1.18309
BGI1473	Neomangiferin	NA	0.487941	0.580222	1.14837			BGI1473	Neomangiferin	NA	0.27371	0.913252	1.33254			BGI1473	Neomangiferin 新芒果苷	NA	0.113003	0.842546	1.53024
BGI1490	Punicalin	NA	0.962177	0.214148	0.894975			BGI1490	Punicalin	NA	0.340453	0.583117	1.36432			BGI1490	Punicalin 安石榴林	NA	0.489069	0.673992	1.22103
BGI1502	Jatrorrhizine hydrochloride	NA	0.992579	0.262103	0.868983			BGI1502	Jatrorrhizine hydrochloride	NA	0.174554	0.868411	1.59633			BGI1502	Jatrorrhizine hydrochloride 盐酸药根碱	NA	0.298864	0.678834	1.38719
BGI1530	S-Methyl-L-cysteine sulfoxide	NA	0.517496	0.657267	1.11628			BGI1530	S-Methyl-L-cysteine sulfoxide	NA	0.0887248	1.02557	0.570151			BGI1530	S-Methyl-L-cysteine sulfoxide	NA	0.587156	0.677312	0.636448
BGI1543	Harpagide	NA	0.0140992	0.967029	0.521015			BGI1543	Harpagide	NA	0.5998	0.403141	1.17804			BGI1543	Harpagide	NA	0.0727752	0.901543	0.613776
BGI1586	Atractylenolide III	NA	0.133074	0.881344	1.85287			BGI1586	Atractylenolide III	NA	0.576884	0.588727	0.731023			BGI1586	Atractylenolide III 白术内酯III	NA	0.0589737	0.588405	1.35449
BGI1588	Atractylenolide II	NA	0.814794	1.26878	0.585297			BGI1588	Atractylenolide II	NA	0.0440228	1.21218	0.575209			BGI1588	Atractylenolide II 白术内酯II	NA	0.231726	1.76077	0.336668
BGI1597	Naringenin chalcone	NA	0.743089	0.844085	1.08118			BGI1597	Naringenin chalcone	NA	0.82595	0.528322	0.858312			BGI1597	Naringenin chalcone 柚皮苷查尔酮	NA	0.900911	0.681549	0.927987
BGI1613	(+)-Usniacin	NA	0.0103206	0.985781	0.568675			BGI1613	(+)-Usniacin	NA	0.0269635	1.21929	1.69269			BGI1613	(+)-Usniacin 松萝酸	NA	0.783666	0.453486	0.962591
BGI1680	Prim-O-glucosylcimifugin	NA	0.0118825	1.62456	2.80128			BGI1680	Prim-O-glucosylcimifugin	NA	0.0129403	1.03473	0.586481			BGI1680	Prim-O-glucosylcimifugin 升麻素苷	NA	0.0814095	1.01813	1.6429
BGI1692	Baicalin methyl ester	NA	0.00389176	1.76203	6.02433			BGI1692	Baicalin methyl ester	NA	0.0188459	1.98528	0.249559			BGI1692	Baicalin methyl ester 黄芩苷甲酯	NA	0.153259	0.605454	1.50343
BGI1709	5-O-Methylvisammioside	NA	0.071201	0.675126	0.708059			BGI1709	5-O-Methylvisammioside	NA	0.943123	0.149194	0.989151			BGI1709	5-O-Methylvisammioside 5-O-甲基维斯阿米醇苷	NA	0.0642918	0.761838	0.700378
BGI1710	Eurycomanone	NA	0.112409	1.50029	0.0649998			BGI1710	Eurycomanone	NA	0.0927323	1.806	0.38301			BGI1710	Eurycomanone 宽缨酮	NA	0.0172532	2.74348	0.0248955
BGI1716	Qingyangshengenin	NA	0.490703	0.801232	0.890441			BGI1716	Qingyangshengenin	NA	0.17405	2.00722	3.84077			BGI1716	Qingyangshengenin 青阳参苷元	NA	0.369373	1.1684	3.41998
BGI1717	Rosavin	NA	0.400737	0.940052	2.66192			BGI1717	Rosavin	NA	0.96384	0.692573	0.499123			BGI1717	Rosavin 络塞维	NA	0.18995	0.632016	1.32863
BGI1721	Pyridoxal 5-phosphate	NA	0.00974363	1.91443	4.10836			BGI1721	Pyridoxal 5-phosphate	NA	0.000575225	2.14935	0.239482			BGI1721	Pyridoxal 5-phosphate	NA	0.354313	1.10377	0.983877
BGI1722	Curculigoside	NA	0.0207447	2.14669	39.3554			BGI1722	Curculigoside	NA	0.582466	1.39668	0.33638			BGI1722	Curculigoside 仙茅苷	NA	0.0135237	1.9207	13.2384
BGI1727	2''-O-β-L-Galactopyranosylorientin	NA	0.0175965	1.01426	0.452998			BGI1727	2''-O-β-L-Galactopyranosylorientin	NA	0.408137	0.869866	0.811922			BGI1727	2''-O-β-L-Galactopyranosylorientin 荭草素-2''-O-β-L半乳糖苷	NA	0.0117052	1.6521	0.367799
BGI1732	N-Acetyl-DL-tryptophan	NA	0.0764273	1.49289	18.3185			BGI1732	N-Acetyl-DL-tryptophan	NA	0.0584534	2.57334	0.0548774			BGI1732	N-Acetyl-DL-tryptophan	NA	0.674923	0.367414	1.00527
BGI1771	Ureidosuccinic acid	NA	0.853736	0.759399	1.14461			BGI1771	Ureidosuccinic acid	NA	0.633071	0.983802	0.698725			BGI1771	Ureidosuccinic acid	NA	0.735664	0.348332	0.799768
BGI1781	17-Hydroxyisolathyrol	NA	0.0461522	0.780695	0.691443			BGI1781	17-Hydroxyisolathyrol	NA	0.791024	0.40985	0.939454			BGI1781	17-Hydroxyisolathyrol 17-羟基异千金二萜醇	NA	0.0163475	0.87873	0.649579
BGI1792	7-O-Ethylmorroniside	NA	0.152493	0.889051	1.84754			BGI1792	7-O-Ethylmorroniside	NA	0.152031	1.18852	1.37233			BGI1792	7-O-Ethylmorroniside 7-氧乙基莫诺苷	NA	0.00281692	1.56801	2.53542
BGI1803	Lactobionic acid	NA	0.0578953	1.32046	2.00605			BGI1803	Lactobionic acid	NA	0.217204	0.850597	0.683676			BGI1803	Lactobionic acid	NA	0.253466	0.932843	1.37149
BGI1807	N-Acetyl-DL-serine	NA	0.380929	0.519924	0.878381			BGI1807	N-Acetyl-DL-serine	NA	0.0828596	1.25091	1.517			BGI1807	N-Acetyl-DL-serine	NA	0.0812825	0.639328	1.3325

## Sheet: Table S3. Classification
Supplementry Table S2: Classification of CaO NPs exhibited change in metabolite expression compared to control plants following the drought treatment
Phenols and derivatives					Amino acids, peptides, and analogues						Terpenoids
Name	Log FC value				Name	Log FC value						Log FC value
	Ck	Drought	Ca-NPs+Drought			Ck	Drought	Ca-NPs+Drought			Name	Ck	Drought	Ca-NPs+Drought
4-Acetamidophenol	581495	712814	970834		5-Aminolevulinic acid	2.7587e+07	4.67754e+07	3.08951e+07			Agnuside	150179	139673	169757
Octopamine	637805	387472	393201		N-Acetyl-L-leucine	13834.2	299073	3505.93			Ginkgolide	3241.38	892969	304647
m-Cresol	398508	574250	687218		L-Homocitrulline	182656	413391	310299			Bilobalide	5924.25	105411	55428.5
Vanillin	509318	494302	383482		Bicine	150009	133922	175056			Nootkatone	584504	361170	288788
D-Synephrine	1.59763e+06	1.44653e+06	3.41649e+06		N-α-Acetyl-L-lysine	2.43764e+06	6.51919e+06	4.53896e+06			Isoalantolactone	1.63113e+06	4.48441e+06	7.43071e+06
					S-Allyl-L-cysteine	142621	156851	167141			α-Cyperone	2.0274e+07	1.01075e+07	2.8079e+07
Organic acids					N-Propionylglycine	475706	1.13077e+06	2.01338e+06			Aucubin	149622	123930	155260
					1H-imidazole-1-acetic acid	2.99484e+07	2.06443e+07	3.10484e+07			Curcumol	48349.3	59471.8	190144
Name	Log FC value				N-α-Acetyl-L-glutamine	2.21265e+06	7.90746e+06	4.67111e+06			Gibberellic acid	18560.5	3445.65	12934.8
	Ck	Drought	Ca-NPs+Drought		cis-4-Hydroxy-D-proline	822778	2212279	2.60667e+06			α-Pinene	1.48457e+06	1.34579e+06	1.22283e+06
Succinic acid	5.22352e+06	3.32269e+06	3.45274e+06		L-Theanine	390117	269024	359669			ALPHA-PINENE	2.47649e+06	46949.7	185581
Maleic acid	3.78036e+06	2.46375e+06	2.77498e+06		L-Norleucine	9.61406e+06	1.60768e+07	1.77454e+07			Linderane	5.8855e+07	2.88947e+07	4.0168e+07
Fumaric acid	3.99562e+06	2.71872e+06	2.42174e+06		D-Proline	2.23595e+07	5.4199e+08	1.47716e+08			Swertiamarin	43859.9	11503.5	72750.3
Agomelatine	588003	271205	393186		4-Guanidinobutyric acid	2.98916e+06	6.62318e+06	7.66157e+06			Gentiopicrin	256632	227490	112841
Acesulfame	340417	335710	199852		L-Hydroxyproline	861472	1.28232e+06	1.82892e+06			Catalpol	172310	112220	236165
Dacarbazine	1.46109e+07	1.19375e+07	1.51989e+07		D-Penicillamine	367901	442703	745081			Asiatic acid	21441.7	15906.8	59262.8
Phosphonoacetic acid	2.84305e+06	715750	582463		3-[(Carboxycarbonyl)amino]-L-alanine	247634	76807.1	88282.7
2-Methylmalonic acid	711469	928949	1.40382e+06		Glycylglycine	382372	519227	673835			Flavonoids
N-Acetyl-L-carnosine	784938	814327	2.70387e+06		L-Serine	5.02194e+06	2.90309e+06	2.89878e+06
L-Anserine	184696	75415.6	56541.8		L-Glutamic acid	810257	789017	906051				Log FC value
2-Hydroxyisobutyric acid	82731.5	38597	140350		DL-β-Leucine	3.89946e+06	1.05848e+07	5.15397e+06			Name	Ck	Drought	Ca-NPs+Drought
					L-Tyrosine	1.78456e+06	2.53429e+06	2.09012e+06			Quercetin	17231.5	26988.5	26623.3
Purines and derivatives					L-Leucine	136391	256434	334738			Camelliaside B	5508.24	150798	40581
					2-Aminoisobutyric acid	9.52702e+07	1.3026e+08	1.1994e+08			Rutin	1.74707e+06	391254	533294
Name	Log FC value				L-homocystine	131229	163580	280195			Diosmetin-7-O-β-D-glucopyranoside	47245.7	22342.3	72588.1
	Ck	Drought	Ca-NPs+Drought		L-Phenylalanine	1.38028e+06	1.02081e+06	1.85584e+06			Orientin	65919.8	40869.1	75449
Guanosine	199348	233839	151062		Glycyl-L-tyrosine	163073	120191	61214.4			Astilbin	28219.2	632519	183738
Inosine	1.3033e+06	952967	3.62367e+06		D-Glutamic acid	7.59462e+06	5.25168e+06	1.19215e+07			Ipriflavone	1.99597e+06	86577.3	116732
Acyclovir	157434	9.92491e+06	251221		L-Isoleucine	3.41561e+06	6.2901e+06	2.92168e+06			Puerarin	65232.2	160651	65279.9
Deoxyadenosine monophosphate	1.04608e+06	1.03818e+06	2.73022e+06		N-Acetyl-L-aspartic acid	160159	106446	564617			Genistein	511670	293965	275455
Adenine	2.67113e+07	2.35536e+07	4.90526e+07		L-Tryptophan	107661	779008	1.83184e+06			Astragalin	417155	334991	124895
											DIHYDROKAEMPFEROL	13836.1	165835	26390.2
Pyrimidine					Alcohols						Naringenin	1.64401e+06	1.34342e+06	2.89951e+06
											Isoquercitrin	76264.1	495576	4314.17
Name	Log FC value				Name	Log FC value					Ononin	198306	375969	152397
	Ck	Drought	Ca-NPs+Drought			Ck	Drought	Ca-NPs+Drought			Tricetin	5117.27	10515.9	3474.84
L-(-)-Nicotine	66653.6	47648.5	145765		1-Caffeoylquinic acid	1.36103e+06	1.87456e+06	3.17818e+06			Isorhamnetin-3-O-nehesperidine	63069.4	241914	99351.3
Isonicotinic acid	4.01911e+07	2.29426e+07	4.62361e+07		Cynarin	745785	64554.9	5684.88			Eriodictyol	15933.5	220436	129014
Nicotinic acid	816129	606307	979698		Chlorogenic acid	153037	140376	117527			Apigenin-7-O-β-D-glucoside	244319	715436	278575
2-Picolinic acid	3.63166e+06	2.53827e+06	1.84851e+06		Isochlorogenic acid C	25838.7	24051.6	10207.9			Glabridin	663273	1.84581e+06	3.00593e+06
trans-Farnesol	1.36498e+06	1.38059e+06	1.06061e+06								Mulberrin	17377.9	25483.1	73734.4
											Hesperetin 5-O-glucoside	808597	756022	97299.6
Steroids					Benzene and derivatives						Epigallocatechin	86577.6	16882.4	33019.3
											Epigallocatechin gallate	372656	24833.3	2898.78
Name	Log FC value				Name	Log FC value					quercetin-3-O-sophoroside	99930.3	1400.45	4012.05
	Ck	Drought	Ca-NPs+Drought			Ck	Drought	Ca-NPs+Drought			kaempferol 3-O-sophoroside	2.90898e+06	689016	838764
Pregnenolone	66160.6	171485	66816.8		3-Methoxyphenylacetic acid	4.42985e+06	1.91092e+06	1.92326e+06			Vitexin	5.55421e+06	1.73355e+06	5.96414e+06
Betamethasone	72081	223907	215289		Methyl p-tert-butylphenylacetate	5.25644e+06	1.97323e+06	2.11738e+06			Homoorientin	605593	74338.1	105997
Hydrocortisone	287532	1.01052e+06	650465		Methyl vanillate	946601	1.47395e+06	560003			Taxifolin	141271	424222	1.22349e+06
Estriol	205001	801243	1.44348e+06		Rheic acid	30133.6	53852	85349.9			Baicalein	65715.6	224971	159386
Medroxyprogesterone	831891	5.05579e+06	3.86321e+06		(R)-Mandelic acid	558195	962060	732527			Scutellarein	544238	200458	235283
					Pyridoxal	2.42317e+06	2.4754e+06	3.09201e+06
Corbohydrates					Salicylic acid	575758	2.17344e+06	2.36804e+06			Coumarins
					Sertraline	5935.81	30718	20985.1
Name	Log FC value				Benztropine	75455.2	57089.8	94946.8			Name	Log FC value
	Ck	Drought	Ca-NPs+Drought		Phthalic acid	1.73891e+06	496654	92628				Ck	Drought	Ca-NPs+Drought
D-Erythronic acid	833553	241306	350523		5-Aminosalicylic acid	130961	383400	376999			Decursinol angelate	86892.9	34057.7	47173.2
Shikimic acid	4.7114e+06	2.52393e+06	3.90422e+06		2-Phenylbutyric acid	239555	447107	161542			Marmesin	233270	1.02246e+06	180770
D-Fructose-1,6-diphosphate	288692	181711	41557.3								Dihydrocoumarin	4.11973e+06	4.51014e+06	3.96893e+06
Mucic acid	1.85262e+06	3.11537e+06	1.65897e+06								7-Methoxycoumarin	8.30172e+06	5.90985e+06	4.70575e+06
Galactitol	8.39093e+06	6.07307e+06	1.3309e+07		Alkaloids						8-Geranyloxypsoralen	7.95391e+06	1.26358e+07	1.83501e+08
L-Arabitol	235202	241003	228464								Scopoletin	702328	254869	1.293e+06
					Name	Log FC value					Methyl eugenol	3.59249e+06	1.26949e+06	1.00615e+06
						Ck	Drought	Ca-NPs+Drought			Osthole	49680.1	318886	172677
					Evodiamine	5.55401e+06	3.05307e+06	3.9619e+06
					Matrine	92006.9	93452.6	226906
					Jatrorrhizine	181479	288572	254205
					Topotecan	1.56187e+06	523544	1.39737e+06
					Tomatidin	887686	794282	635840
					Harmol	570473	522506	293648

## Sheet: Table S4. Up.down DEMs
Supplementry Table S1: Deferentially up and down regulated metabolites identified in rapeseed plants following the CaO NPs and drought treatment
Ck Vs Ca-NPs+D						Ck Vs D
BGI_num	Name	logFC	VIP	Expression		BGI_num	Name	logFC	VIP	Expression
NA	NA	1.44607	1.22673	Up		BGI0050	Epigoitrin	0.905812	1.06879	Up
BGI0175	Camelliaside B	2.01873	1.51818	Up		BGI0119	Scutellarin methyl ester	2.20527	1.856	Up
BGI0196	Lobetyolin	1.76108	2.23654	Up		BGI0175	Camelliaside B	2.11686	1.72393	Up
BGI0239	Pregnenolone	1.3052	1.41123	Up		BGI0196	Lobetyolin	2.84462	2.32659	Up
BGI0266	Ginkgolide B	1.33236	2.04176	Up		BGI0239	Pregnenolone	1.67435	1.19749	Up
BGI0414	N-Propionylglycine	2.53457	1.44169	Up		BGI0266	Ginkgolide B	1.72254	1.8794	Up
BGI0473	Aristolone	2.01025	1.22888	Up		BGI0361	N-α-Acetyl-L-lysine	0.947802	1.12522	Up
BGI0480	7-Methoxy-4-methylcoumarin	2.47879	1.66328	Up		BGI0401	Gentiopicrin	1.77272	1.3227	Up
BGI0483	cis-4-Hydroxy-D-proline	2.81979	1.26068	Up		BGI0410	Glucoraphanin	1.42962	1.53476	Up
BGI0599	Bilobalide	2.16258	1.82262	Up		BGI0448	Norisoboldine	2.8465	2.29699	Up
BGI0611	D-Proline	2.13142	1.84126	Up		BGI0526	Pectolinarin	1.61597	1.26604	Up
BGI0765	Taxifolin	1.48051	1.78034	Up		BGI0574	5,7-Dihydroxychromone	1.24279	1.45492	Up
BGI0770	Naringenin	1.53191	1.33958	Up		BGI0599	Bilobalide	2.99545	2.45729	Up
BGI0839	Estriol	2.41992	1.60733	Up		BGI0611	D-Proline	2.69112	2.14896	Up
BGI0847	Thymidine	1.74807	1.15791	Up		BGI0654	4'-O-Glucosylvitexin	1.18155	1.37765	Up
BGI0868	L-Hydroxyproline	2.45017	1.24517	Up		BGI0780	Isoquercitrin	3.44367	1.61263	Up
NA	NA	1.79167	1.1667	Up		BGI0789	Osthole	2.51995	1.7999	Up
BGI0995	Eriodictyol	1.79615	1.27175	Up		BGI0799	Ononin	0.955588	1.03534	Up
BGI1008	Maleamic Acid	2.05726	1.73379	Up		BGI0839	Estriol	1.25311	1.19703	Up
BGI1026	DL-β-Leucine	2.6473	1.14253	Up		BGI0908	Medroxyprogesterone	2.19664	1.67633	Up
BGI1069	Acyclovir	2.18939	1.27451	Up		NA	NA	2.66227	2.06336	Up
BGI1085	6-Aminocaproic acid	2.43336	1.52407	Up		BGI0988	Isorhamnetin-3-O-nehesperidine	1.94636	1.52382	Up
BGI1107	L-Leucine	2.16901	1.34674	Up		BGI0995	Eriodictyol	2.08181	1.52502	Up
BGI1155	Traumatic acid	1.72999	1.46464	Up		BGI1008	Maleamic Acid	2.67486	2.1229	Up
BGI1221	Germacrone	1.98547	1.28782	Up		BGI1026	DL-β-Leucine	1.188	1.29218	Up
BGI1259	L-Tryptophan	2.39205	2.16808	Up		BGI1037	Apigenin-7-O-β-D-glucoside	1.76697	1.42902	Up
BGI1300	Triethyl citrate	2.51649	1.36702	Up		BGI1091	Thiocolchicoside	1.02534	1.33806	Up
BGI1329	Sertraline	2.14668	1.27193	Up		BGI1096	Narcissoside	1.90399	1.55515	Up
BGI1347	Purpurin	1.87013	1.52227	Up		BGI1155	Traumatic acid	1.78149	1.62996	Up
BGI1383	Curculigoside	1.8689	1.9207	Up		BGI1259	L-Tryptophan	1.11197	1.22356	Up
BGI1440	7-O-Ethylmorroniside	2.55022	1.56801	Up		BGI1262	L-Isoleucine	1.08084	1.19988	Up
						BGI1294	Danshensu	1.48804	1.5195	Up
						BGI1300	Triethyl citrate	1.9974	1.71357	Up
BGI_num	Name	logFC	VIP	Expression		BGI1329	Sertraline	1.32341	1.37627	Up
BGI0090	Ferulic acid	-1.33454	1.47913	Down		BGI1341	Prim-O-glucosylcimifugin	1.48608	1.62456	Up
BGI0160	Aurantio-obtusin β-D-glucoside	-1.66281	1.47334	Down		BGI1347	Purpurin	1.00058	1.14681	Up
BGI0206	Taxifolin 7-rhamnoside	-1.68119	1.67707	Down		BGI1352	Baicalin methyl ester	2.5908	1.76203	Up
BGI0227	Sweroside	-1.604	1.60297	Down		Ck Vs Drought
BGI0515	5-Hydroxy-1-tetralone	-1.2527	1.37662	Down
NA	NA	-1.15114	1.14468	Down		BGI_num	Name	logFC	VIP	Expression
BGI0622	Methyl p-tert-butylphenylacetate	-0.839628	1.0766	Down		BGI0090	Ferulic acid	-1.68723	1.5201	Down
BGI0762	Astragalin	-0.850124	1.18647	Down		BGI0160	Aurantio-obtusin β-D-glucoside	-1.56151	1.34192	Down
BGI0812	D-Fructose-1,6-diphosphate	-2.14291	1.54374	Down		BGI0206	Taxifolin 7-rhamnoside	-1.86268	1.53859	Down
BGI1177	Uracil	-1.22529	1.17471	Down		BGI0311	Swertiamarin	-1.65441	1.49647	Down
BGI1332	Hydroxymalonic acid	-1.16535	1.22322	Down		NA	NA	-3.8508	2.0333	Down
BGI1369	Eurycomanone	-5.32797	2.74348	Down		BGI0344	(+)-Corynoline	-1.20924	1.20881	Down
BGI1387	2''-O-β-L-Galactopyranosylorientin 荭草素-2''-O-β-L半乳糖苷	-1.44301	1.6521	Down		BGI0345	Acetylcorynoline	-0.905906	1.04413	Down
NA	NA	-1.57383	1.68421	Down		BGI0427	4-Methoxysalicylic acid	-4.47627	1.79293	Down
NA	Epigallocatechin	-1.27443	1.28285	Down		BGI0436	Neferine	-1.65017	1.5213	Down
						BGI0492	Alisol C 23-acetate	-1.75032	1.54044	Down
						NA	NA	-1.38898	1.37039	Down
						BGI0619	Ipriflavone	-2.98903	1.80069	Down
						BGI0659	9-Methoxycamptothecin	-1.29727	1.3035	Down
						BGI0719	Bufalin	-1.22905	1.06502	Down
						BGI0773	Orsellinic acid	-0.961387	1.08375	Down
						NA	NA	-1.37409	1.32261	Down
						BGI1022	N-Acetyl-L-carnosine	-1.06753	1.15621	Down
						BGI1055	Schisandrol	-1.02478	1.0449	Down
						BGI1260	Adenine	-0.704436	1.08608	Down
						NA	NA	-3.14133	1.78723	Down
						NA	NA	-2.85282	1.82777	Down
						BGI1367	Sudan I	-1.33039	1.67454	Down
						BGI1387	2''-O-β-L-Galactopyranosylorientin	-1.14242	1.01426	Down
						NA	NA	-1.32104	1.06945	Down
						BGI1454	Epigallocatechin	-1.28756	1.23275	Down
						BGI1468	(-)-Epigallocatechin gallate	-1.53305	1.28626	Down
